# Supplementary material
Source: PubMed Central journal article supplement (PMC6827293)
Supplement: supp_RA119.010316_154667_1_supp_384113_pwpp6r.pdf [file supp_RA119.010316_154667_1_supp_384113_pwpp6r.pdf]

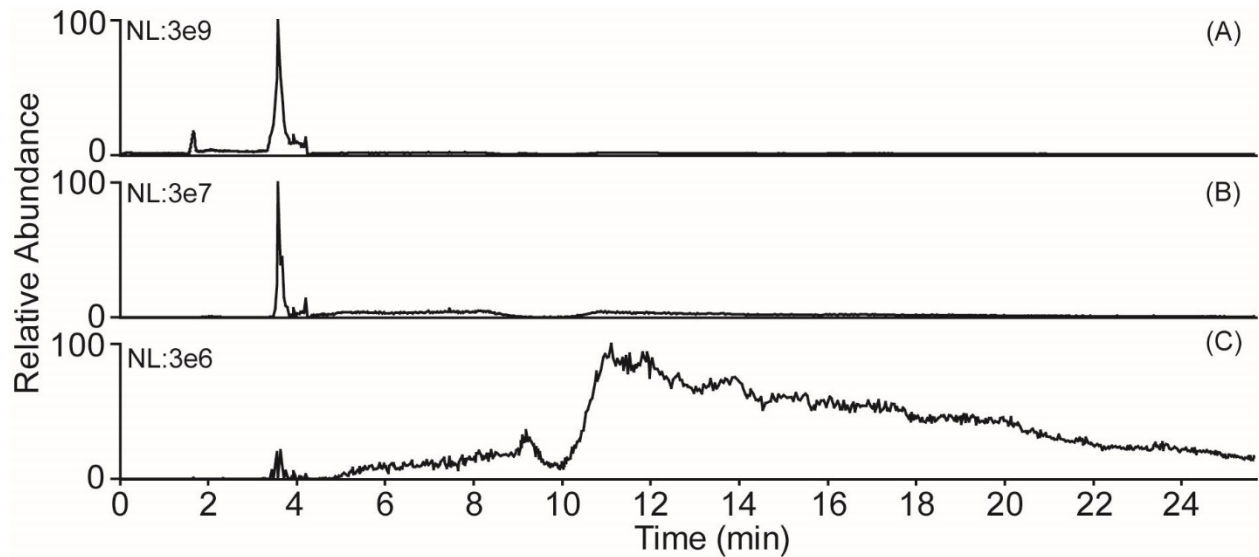

Figure S1: (A) Total ion current chromatogram of isocratically eluted proteins. (B) Extracted ion chromatogram of the protamine RRRRRRRRRRRRRRRRRRRRGRK\* (where \* = di-aminopropylation). Proteins that did not retain on column were primarily detected from minutes 3-4. (C) Extracted ion chromatogram of the protamine RRRRRRKSRRRRRRRRRRRSKGSRSPRRR\*. Proteins that were washed off the column started eluting at ~10 minutes.

Supplementary Fig 1. D'Ippolito et al. 2019

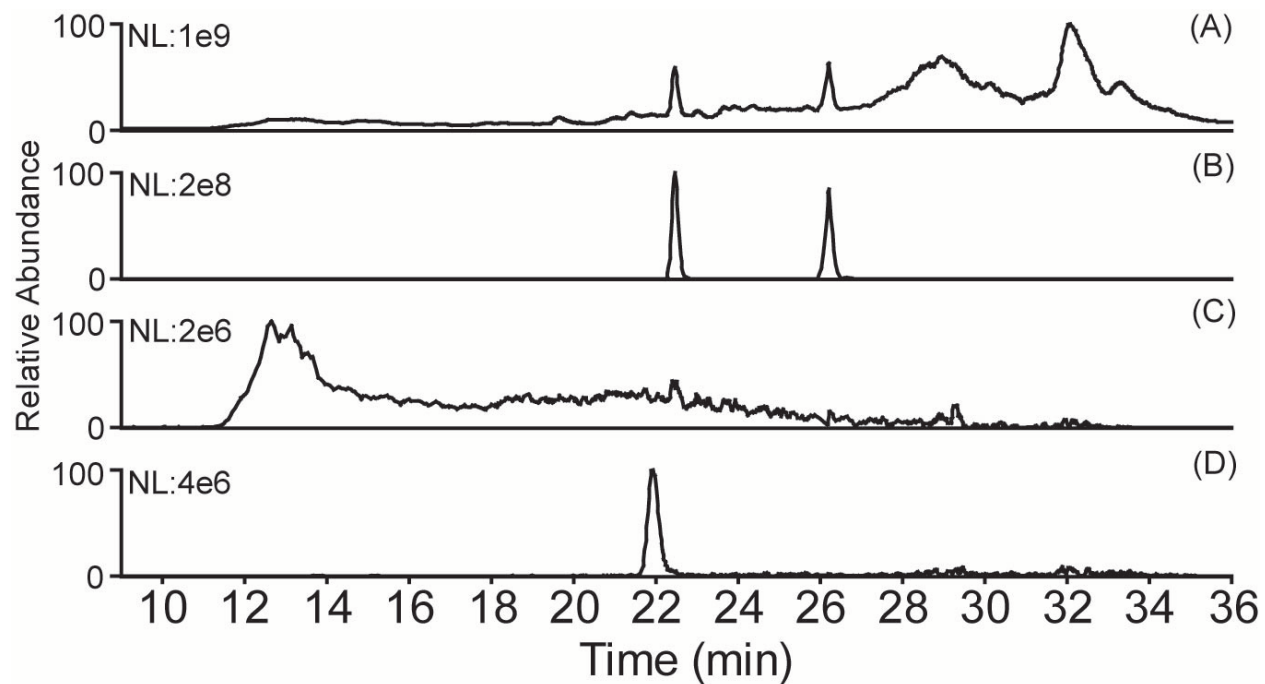

Figure S2: (A) Total ion chromatogram of the gradient elution of proteins. (B) The extracted ion chromatogram of 100 fmol of vasoactive intestinal peptide and angiotensin I. These peptides are used as internal standards. (C) The extracted ion chromatogram of the protamine RRRRRRRHGRKGKKPKRHHRRRRRRRRRGRKKAHRGRKKKRGGRKGGRRKGRKRRHHRRRR\* (where \* = diaminopropylation). The protamines detected eluted from the column from ~11 minutes to ~22 minutes with the maximum height at ~13 minutes. (D) The extracted ion chromatogram of Ribosomal Protein S30. Unlike the protamines, these proteins eluted as a defined peak shape.

Supplementary Fig 2. D'Ippolito et al. 2019

Supplemental Table 1: Additional Mass Spectrometry Information for Identified Protamines.  
 The lower portion contain protamines identified in low abundance. Amino acid in brackets do not have a corresponding fragment ion to confirm sequence.

| Protein Name | NCBI Accession Number | Sequence                                              | Modifications                      | M+H     | Observed m/z | Precursor Charge | HCD MS <sup>3</sup> Taken? | Notes                                                                                                                                              |
|--------------|-----------------------|-------------------------------------------------------|------------------------------------|---------|--------------|------------------|----------------------------|----------------------------------------------------------------------------------------------------------------------------------------------------|
| PL-1 (MpPRM) | BAU71552              | RRRRRRKSRRRRRRRRRSKGSRSRRR*                           | Di-aminopropanelation (C-terminus) | 3955.51 | 495.3208     | 8                | No                         |                                                                                                                                                    |
| PL-1 (MpPRM) | BAU71552              | RRRRRRKSRRRRRRRRRSKGSRSRRR*                           | Di-aminopropanelation (C-terminus) | 3799.41 | 543.6367     | 7                | No                         |                                                                                                                                                    |
| PL-1 (MpPRM) | BAU71552              | RRRRRRHHKKGKKKGRRRRRKRRGRR*                           | Di-aminopropanelation (C-terminus) | 3942.56 | 438.9591     | 9                | Yes                        |                                                                                                                                                    |
| PL-1 (MpPRM) | BAU71552              | RRRRRRRRRRRRRSRRRRGK*                                 | Di-aminopropanelation (C-terminus) | 3313.16 | 553.0345     | 6                | No                         |                                                                                                                                                    |
| PL-3         | PTQ32223              | RRRRRRHGRKPKRHRRRRRRRRGRKKAHRGKKKGGRRKGRHRRRRR*       | Di-aminopropanelation (C-terminus) | 7466.75 | 575.2967     | 13               | No                         |                                                                                                                                                    |
| PL-2         | PTQ35141              | RSTSRSRSGRRRRRRRRRGRRRRGRK*                           | Di-aminopropanelation (C-terminus) | 4082.51 | 584.0801     | 7                | No                         |                                                                                                                                                    |
| PL-1 (MpPRM) | BAU71552              | RRRRRRKSRRRRRRRRR[SKGSH]SPRR*                         | Di-aminopropanelation (C-terminus) | 3780.36 | 540.9152     | 7                | No                         | Very poor C-terminal coverage limits the deduction of sequence. The residues within the brackets are unknown and may contain different amino acids |
| PL-1 (MpPRM) | BAU71552              | RRRRRRKSRRRR[RRTVDRRRRRRRRR]                          |                                    | 4139.33 | 690.7283     | 6                |                            |                                                                                                                                                    |
| PL-1 (MpPRM) | BAU71552              | RRRRRRKSRRRRRRRRRSKGSRSRRRHSSR                        |                                    | 4366.65 | 546.7151     | 8                |                            |                                                                                                                                                    |
| PL-3         | PTQ32223              | RRRRRRHGRKPKRHRRRRRRRRGRKKAHRGKKKGGRRKGRHRRRRR[SKGSH] |                                    | 7819.01 | 602.4605     | 13               |                            |                                                                                                                                                    |

# Annotated ETD MS<sup>2</sup> Spectra

This document contains the spectra obtained from the analysis of *Marchantia polymorpha* protamines. Each observed protamine in this document contains a page with the spectrum on a single axis, multiple pages for the manual annotation, and a page containing theoretical fragment masses.

## Table of Contents

| <u>Pages</u> | <u>Sequence</u>                                                   |
|--------------|-------------------------------------------------------------------|
| 2-6          | RRRRRRKSRRRRRRRRRRRSKGSRSPPRR*                                    |
| 7-12         | RRRRRRKSRRRRRRRRRRRSKGSRSPPR*                                     |
| 13-16        | RRRRRRRHHKKGKKKGRRRRRRKRRRGRR*                                    |
| 17-22        | RRRRRRRRRRRRRRRRRSRRRRGRK*                                        |
| 23-30        | RRRRRRRHGRKGKKPKRHRRRRRRRRRRGRRKAHRGRKKKRGGRKGGRRKGRHRRRR*        |
| 31-35        | RSTSRSRGRRRRRRRRHRRRRGRRRRGRK*                                    |
| 36-38        | RRRRRRKSRRRRRRRRRR[SKGSH]SPRR*                                    |
| 39-41        | RRRRRRKSRRRR[RRTVDRRRRRRRRRRR]                                    |
| 42-45        | RRRRRRKSRRRRRRRRRRSKGSRSPPRRHSSR                                  |
| 46-51        | RRRRRRRHGRKGKKPKRHRRRRRRRRRRGRRKAHRGRKKKRGGRKGGRRKGRHRRRRRR[GKSH] |

021519\_0p2perYellowTube\_Gradient\_DD\_Heat15 #2679-3590 RT: 11.45-13.86 AV: 11 NL: 1.19E5  
T: FTMS + p NSI d Full ms2 495.4470@etd6.66 [120.0000-2000.0000]

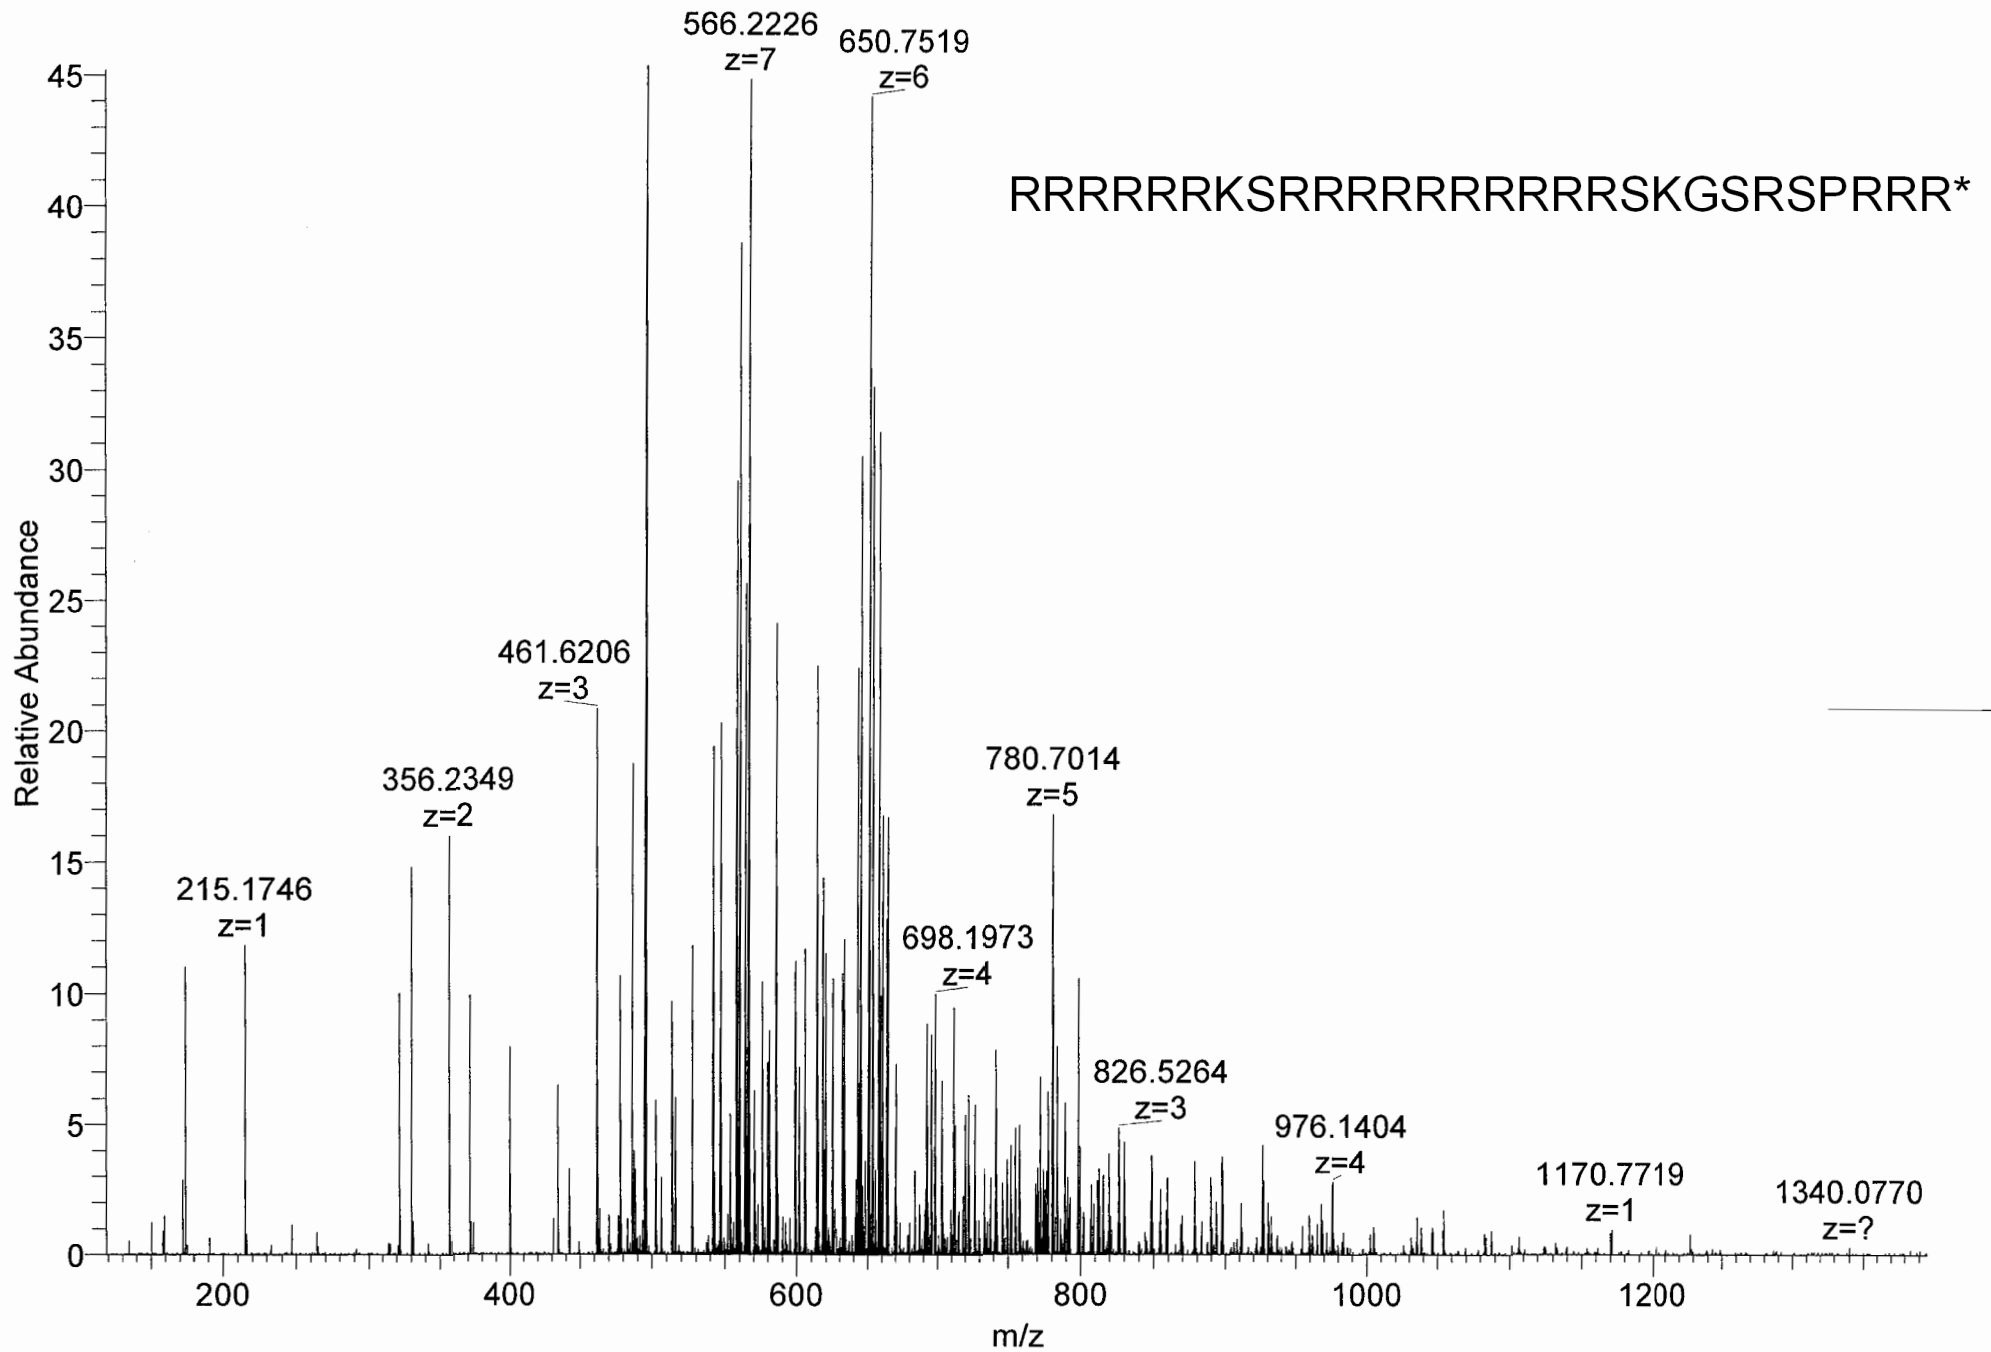

021519\_0p2perYellowTube\_Gradient\_DD\_Heat15 #2680-3590 RT: 11.45-13.86 AV: 11 NL: 1.19E5  
T: FTMS + p NSI d Full ms2 495.4470@etd6.66 [120.0000-2000.0000]

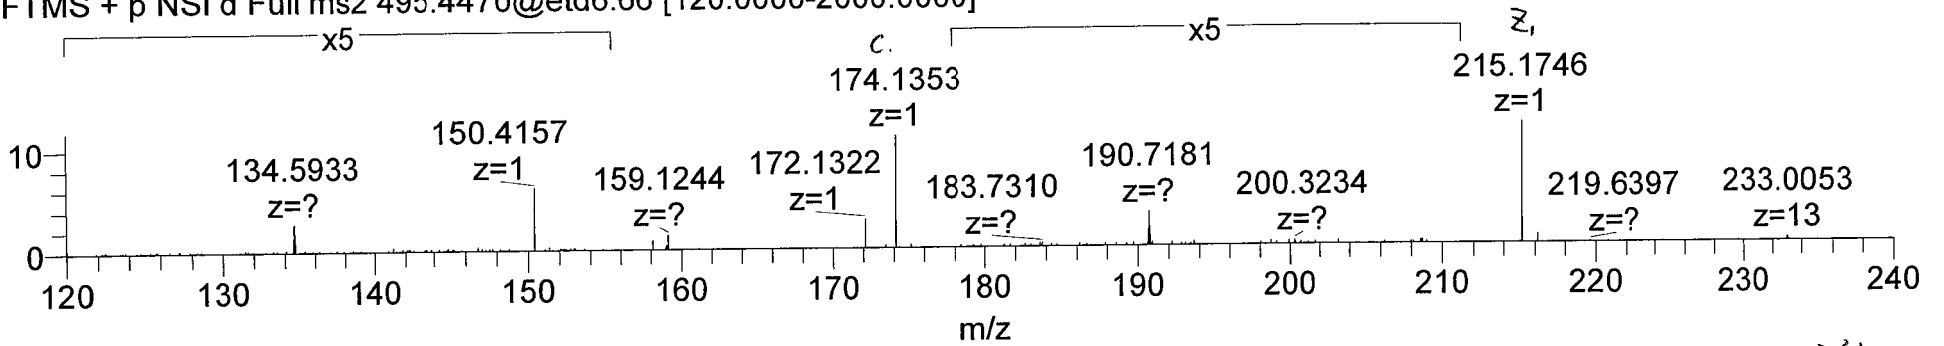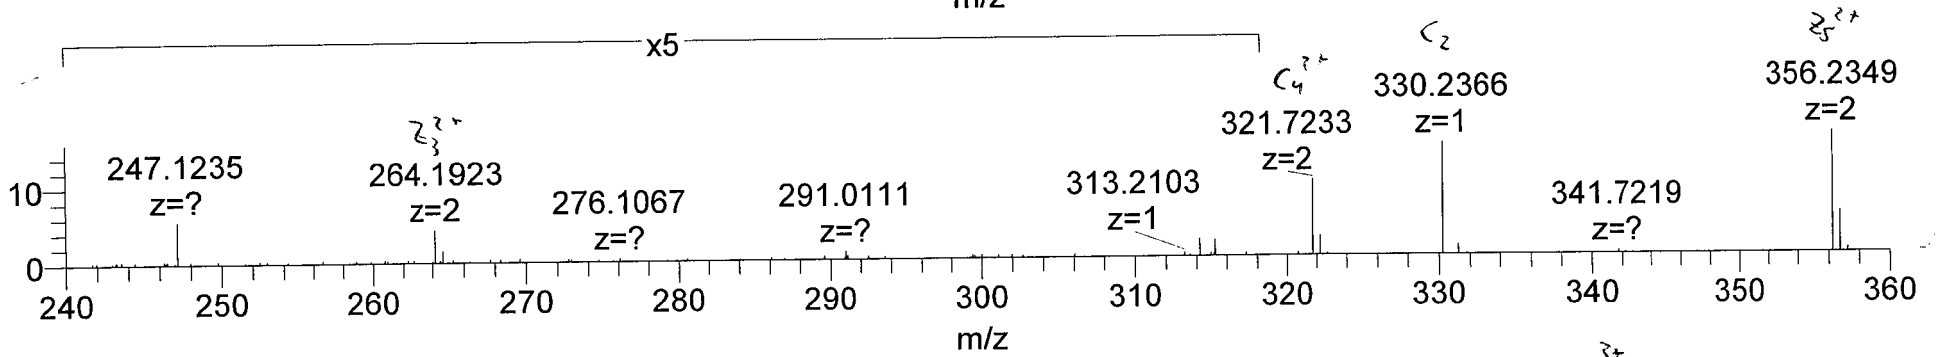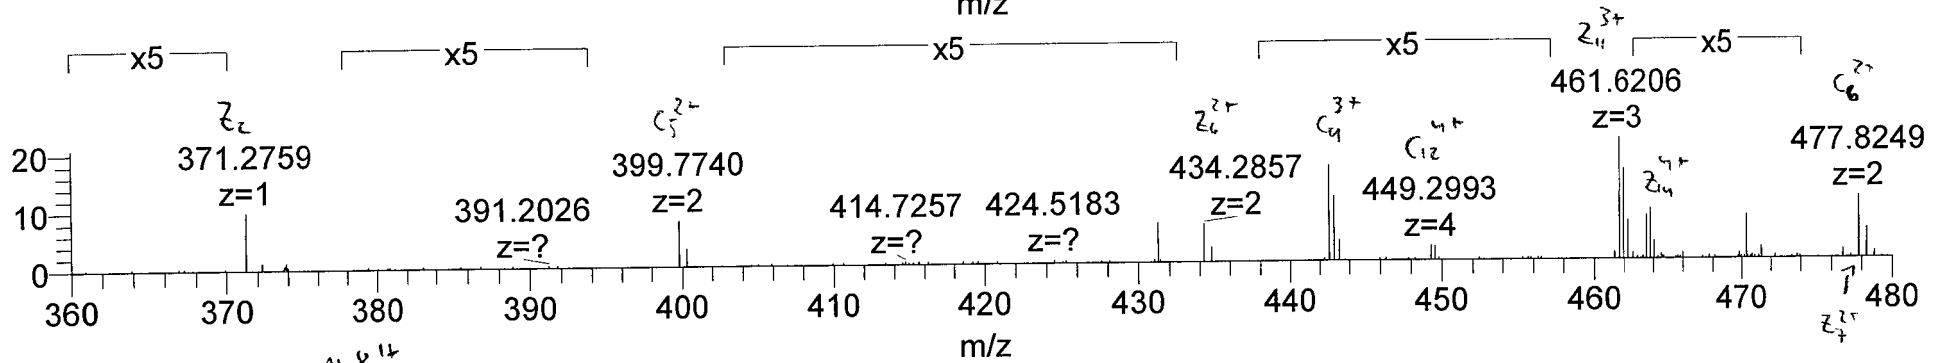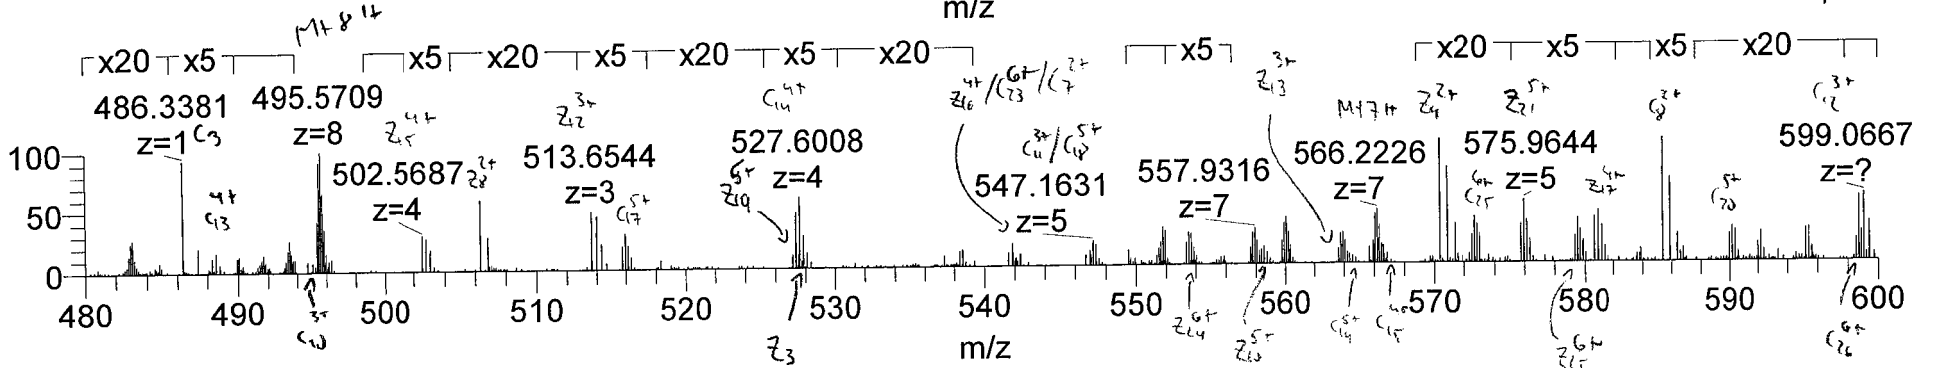

021519\_Op2perYellowTube\_Gradient\_DD\_Heat15 #2680-3590 RT: 11.45-13.86 AV: 11 NL: 5.25E4

T: FTMS + p NSI d Full ms2 495.4470@etd6.66 [120.0000-2000.0000]

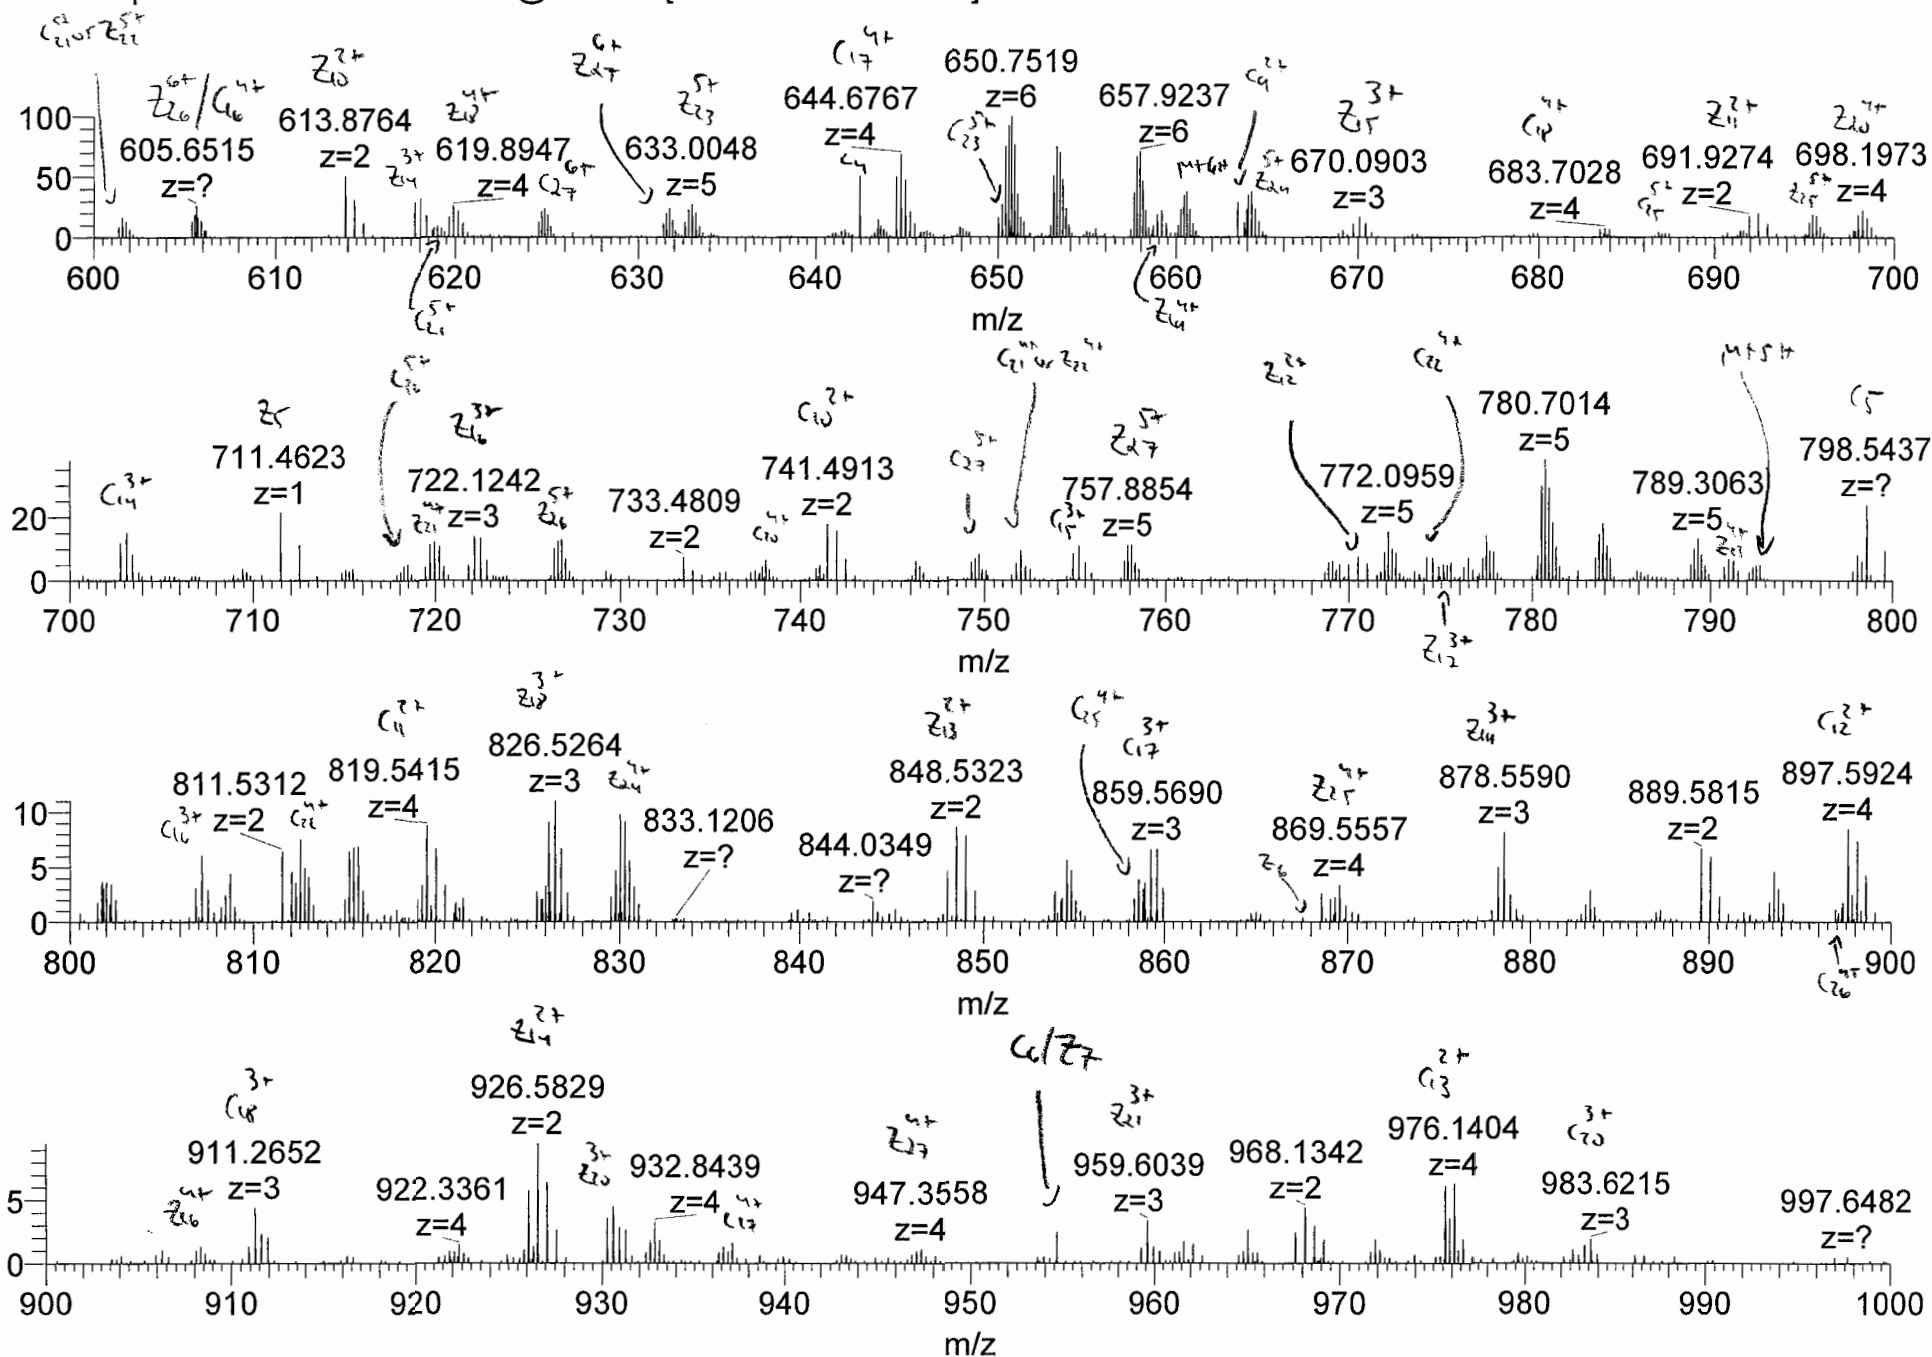

021519\_0p2perYellowTube\_Gradient\_DD\_Heat15 #2680-3590 RT: 11.45-13.86 AV: 11 NL: 2.03E3  
T: FTMS + p NSI d Full ms2 495.4470@etd6.66 [120.0000-2000.0000]

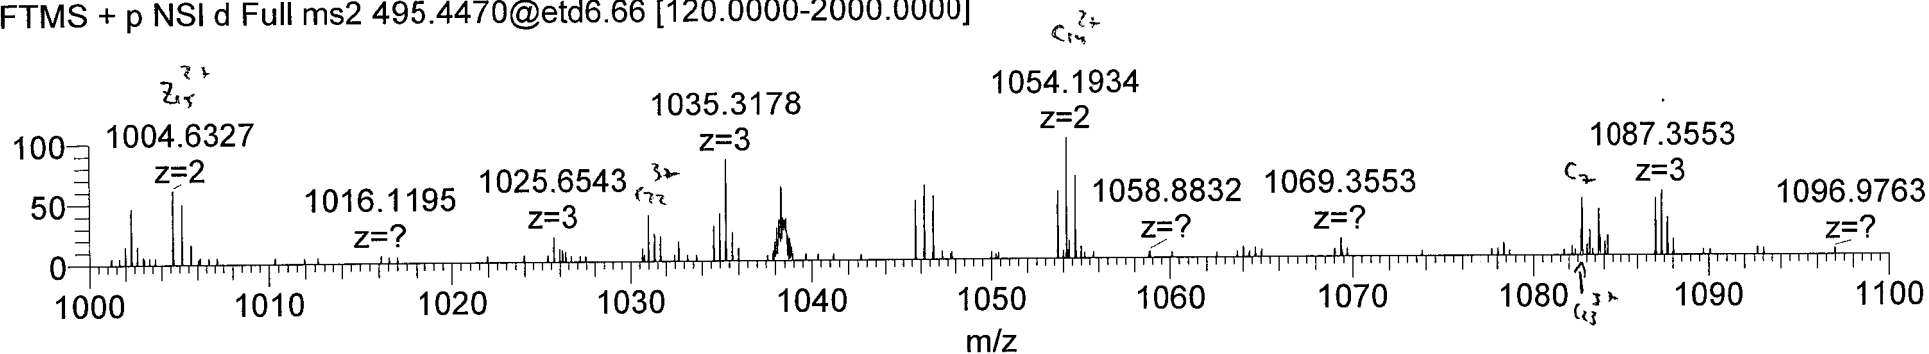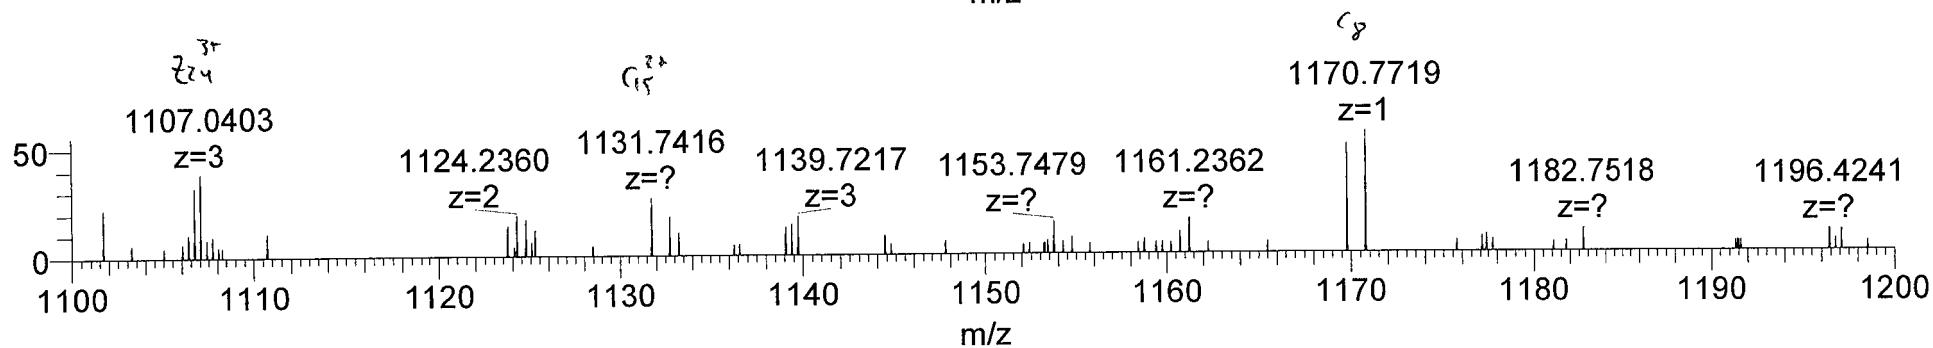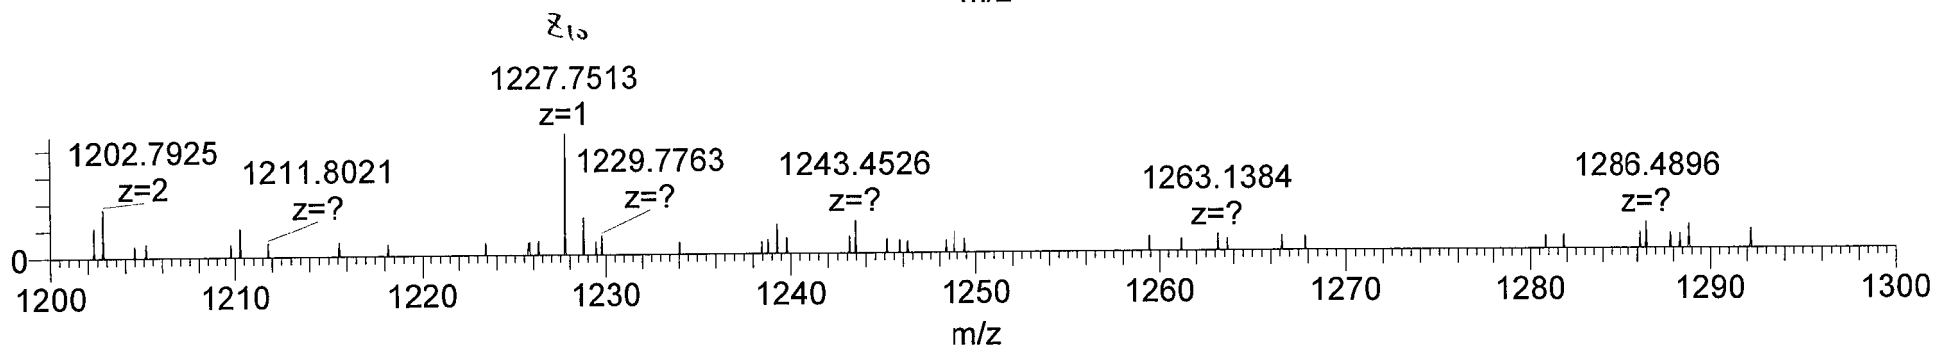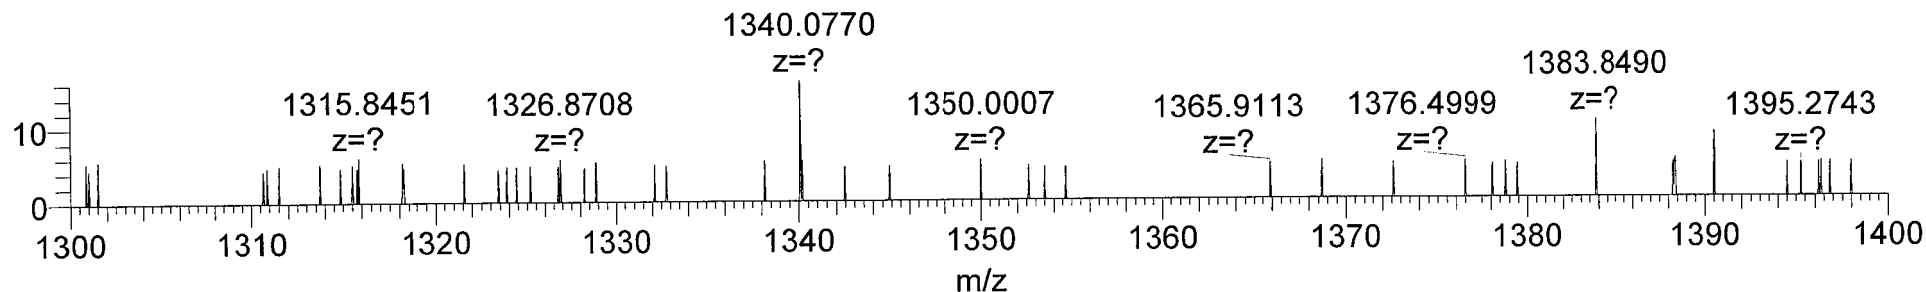



# Fragment Masses

| +6 c ions | +5 c ions | +4 c ions | +3 c ions | +2 c ions | +1 c ions | Sequence      | +1 z ions | +2 z ions | +3 z ions | +4 z ions | +5 z ions | +6 z ions |
|-----------|-----------|-----------|-----------|-----------|-----------|---------------|-----------|-----------|-----------|-----------|-----------|-----------|
| 29.8619   | 35.6328   | 44.2892   | 58.7165   | 87.5711   | 174.1349  | 1 R           | 3955.5063 | 1978.2568 | 1319.1736 | 989.6320  | 791.9071  | 660.0905  |
| 55.8787   | 66.8530   | 83.3145   | 110.7502  | 165.6217  | 330.2360  | 2 R           | 3783.3865 | 1892.1969 | 1261.8003 | 946.6021  | 757.4831  | 631.4038  |
| 81.8956   | 98.0733   | 122.3397  | 162.7839  | 243.6722  | 486.3372  | 3 R           | 3627.2854 | 1814.1463 | 1209.7666 | 907.5768  | 726.2629  | 605.3870  |
| 107.9124  | 129.2935  | 161.3650  | 214.8176  | 321.7228  | 642.4383  | 4 R           | 3471.1843 | 1736.0958 | 1157.7329 | 868.5515  | 695.0427  | 579.3701  |
| 133.9293  | 160.5137  | 200.3903  | 266.8513  | 399.7733  | 798.5394  | 5 R           | 3315.0832 | 1658.0452 | 1105.6992 | 829.5262  | 663.8225  | 553.3533  |
| 159.9461  | 191.7339  | 239.4156  | 318.8850  | 477.8239  | 954.6405  | 6 R           | 3158.9821 | 1579.9947 | 1053.6655 | 790.5010  | 632.6022  | 527.3364  |
| 181.2953  | 217.3529  | 271.4393  | 361.5833  | 541.8714  | 1082.7355 | 7 K           | 3002.8809 | 1501.9441 | 1001.6318 | 751.4757  | 601.3820  | 501.3196  |
| 195.8006  | 234.7593  | 293.1973  | 390.5940  | 585.3874  | 1169.7675 | 8 S           | 2874.7860 | 1437.8966 | 958.9335  | 719.4520  | 575.7630  | 479.9704  |
| 221.8175  | 265.9795  | 332.2226  | 442.6277  | 663.4379  | 1325.8686 | 9 R           | 2787.7539 | 1394.3806 | 929.9228  | 697.6939  | 558.3566  | 465.4651  |
| 247.8343  | 297.1998  | 371.2479  | 494.6614  | 741.4885  | 1481.9697 | 10 R          | 2631.6528 | 1316.3301 | 877.8891  | 658.6687  | 527.1364  | 439.4482  |
| 273.8512  | 328.4200  | 410.2732  | 546.6951  | 819.5390  | 1638.0708 | 11 R          | 2475.5517 | 1238.2795 | 825.8554  | 619.6434  | 495.9162  | 413.4314  |
| 299.8681  | 359.6402  | 449.2984  | 598.7288  | 897.5896  | 1794.1719 | 12 R          | 2319.4506 | 1160.2289 | 773.8217  | 580.6181  | 464.6959  | 387.4145  |
| 325.8849  | 390.8604  | 488.3237  | 650.7625  | 975.6402  | 1950.2730 | 13 R          | 2163.3495 | 1082.1784 | 721.7880  | 541.5928  | 433.4757  | 361.3976  |
| 351.9018  | 422.0807  | 527.3490  | 702.7962  | 1053.6907 | 2106.3741 | 14 R          | 2007.2484 | 1004.1278 | 669.7543  | 502.5676  | 402.2555  | 335.3808  |
| 377.9186  | 453.3009  | 566.3743  | 754.8299  | 1131.7413 | 2262.4753 | 15 R          | 1851.1473 | 926.0773  | 617.7206  | 463.5423  | 371.0353  | 309.3639  |
| 403.9355  | 484.5211  | 605.3995  | 806.8636  | 1209.7918 | 2418.5764 | 16 R          | 1695.0462 | 848.0267  | 565.6669  | 424.5170  | 339.8151  | 283.3471  |
| 429.9523  | 515.7413  | 644.4248  | 858.8973  | 1287.8424 | 2574.6775 | 17 R          | 1538.9451 | 769.9762  | 513.6532  | 385.4917  | 308.5948  | 257.3302  |
| 455.9692  | 546.9615  | 683.4501  | 910.9310  | 1365.8929 | 2730.7786 | 18 R          | 1382.8439 | 691.9258  | 461.6195  | 346.4694  | 277.3746  | 231.3134  |
| 470.4745  | 564.3679  | 705.2081  | 939.9417  | 1409.4089 | 2817.8106 | 19 S          | 1226.7428 | 613.8751  | 409.5858  | 307.4412  | 246.1544  | 205.2965  |
| 491.8237  | 589.9869  | 737.2319  | 982.6400  | 1473.4564 | 2945.9056 | 20 K          | 1139.7108 | 570.3590  | 380.5751  | 285.6832  | 228.7480  | 190.7912  |
| 501.3272  | 601.3912  | 751.4872  | 1001.6472 | 1501.9672 | 3002.9270 | 21 G          | 1011.6158 | 506.3116  | 337.8768  | 253.6594  | 203.1290  | 169.4420  |
| 515.8326  | 618.7976  | 773.2452  | 1030.6579 | 1545.4832 | 3089.9591 | 22 S          | 954.5944  | 477.8008  | 318.8696  | 239.4041  | 191.7247  | 159.9385  |
| 541.8494  | 650.0179  | 812.2705  | 1082.6916 | 1623.5337 | 3246.0602 | 23 R          | 867.5624  | 434.2848  | 288.8590  | 217.6460  | 174.3183  | 145.4331  |
| 556.3548  | 667.4243  | 834.0285  | 1111.7023 | 1667.0497 | 3333.0922 | 24 S          | 711.4612  | 356.2343  | 237.8253  | 178.6208  | 143.0981  | 119.4163  |
| 572.5302  | 686.8348  | 858.2917  | 1144.0532 | 1715.5761 | 3430.1450 | 25 P          | 624.4292  | 312.7182  | 208.8146  | 156.8628  | 125.0917  | 104.9109  |
| 588.5471  | 718.0550  | 897.3170  | 1196.0869 | 1793.6267 | 3586.2461 | 26 R          | 527.3764  | 264.1919  | 178.4637  | 132.5996  | 106.2811  | 88.7355   |
| 624.5639  | 749.2753  | 936.3423  | 1248.1206 | 1871.6772 | 3742.3472 | 27 R          | 371.2753  | 186.1413  | 124.4300  | 93.5743   | 75.0609   | 62.7186   |
| 660.0905  | 791.9071  | 989.6320  | 1319.1736 | 1978.2568 | 3955.5063 | 28 R          | 215.1742  | 108.0908  | 72.3963   | 54.5490   | 43.8407   | 36.7018   |
|           |           |           |           |           |           | (stem + 56... |           |           |           |           |           |           |

021519\_0p2perYellowTube\_Gradient\_DD\_Heat15 #2877-4040 RT: 12.14-15.39 AV: 16 NL: 1.04E5  
T: FTMS + p NSI d Full ms2 543.9236@etd8.70 [120.0000-2000.0000]

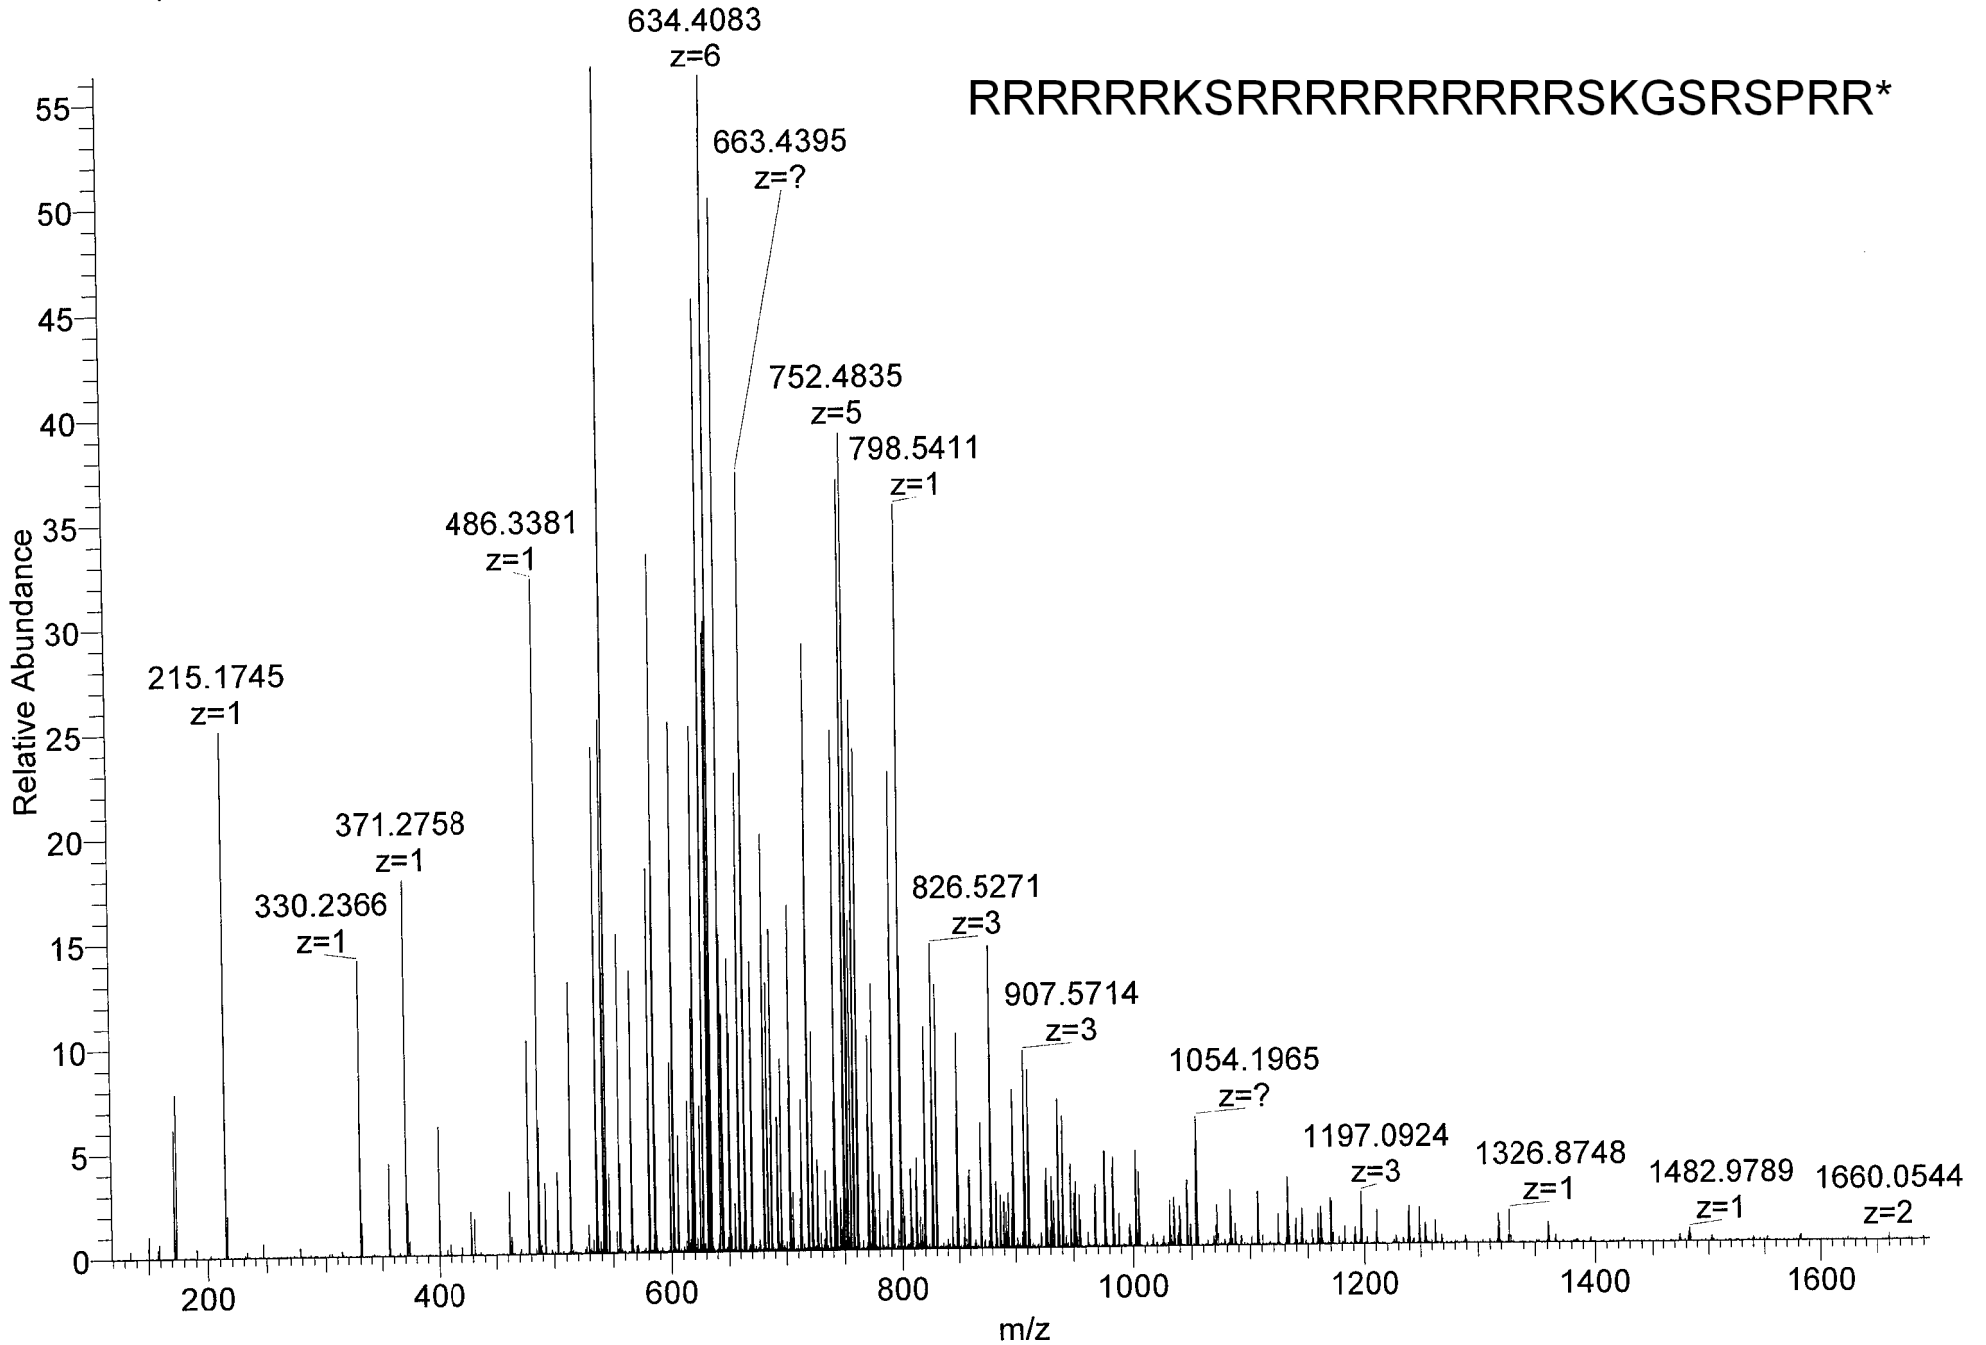

021519\_0p2perYellowTube\_Gradient\_DD\_Heat15 #2877-4039 RT: 12.14-15.39 AV: 16 NL: 1.04E5  
T: FTMS + p NSI d Full ms2 543.9236@etd8.70 [120.0000-2000.0000]

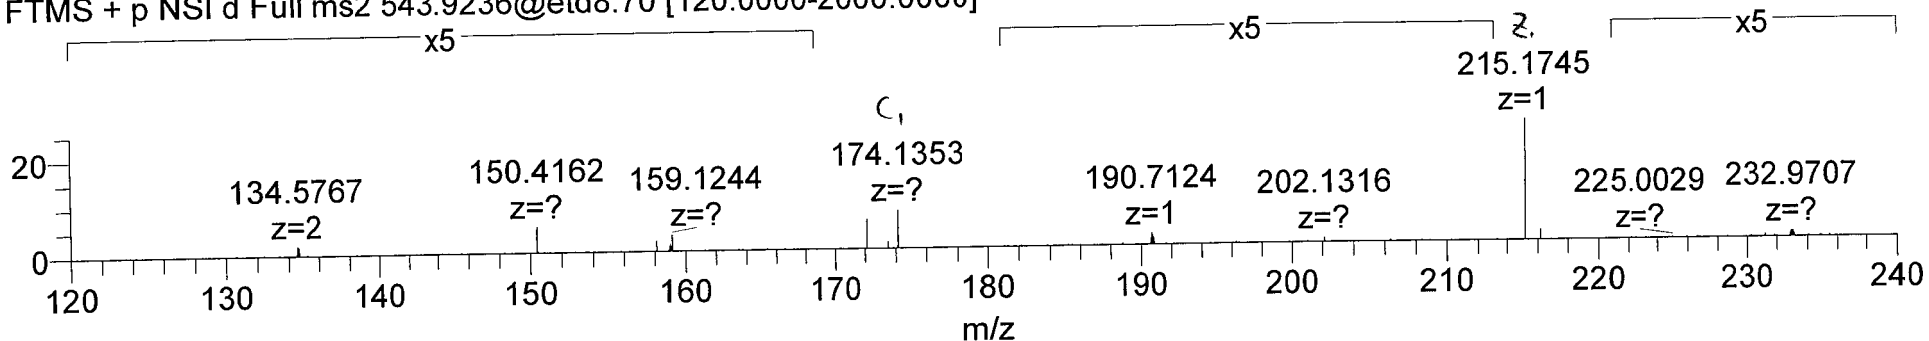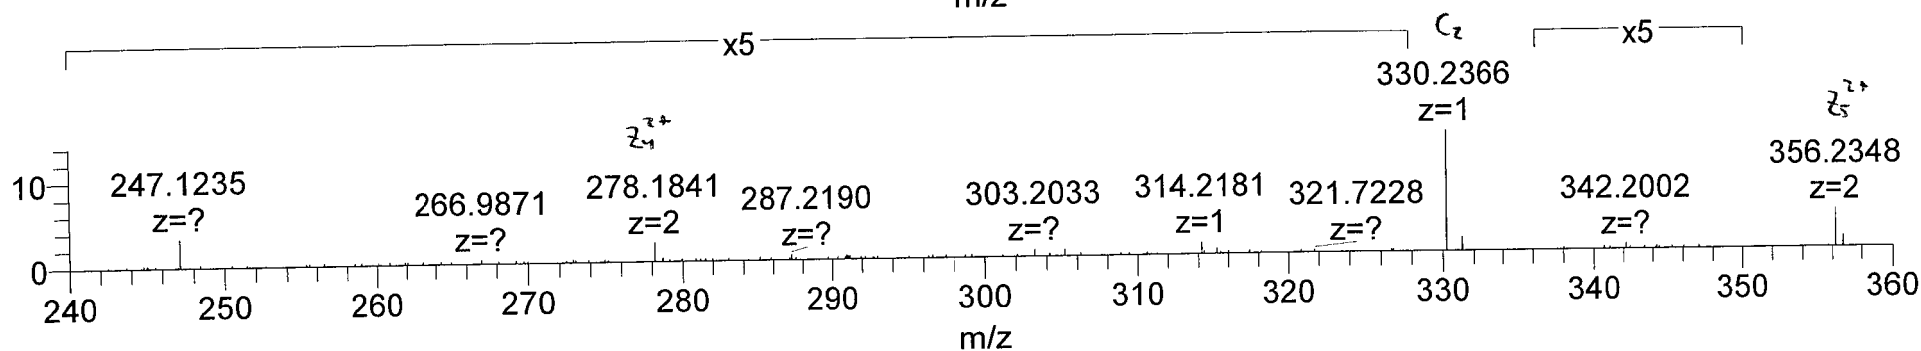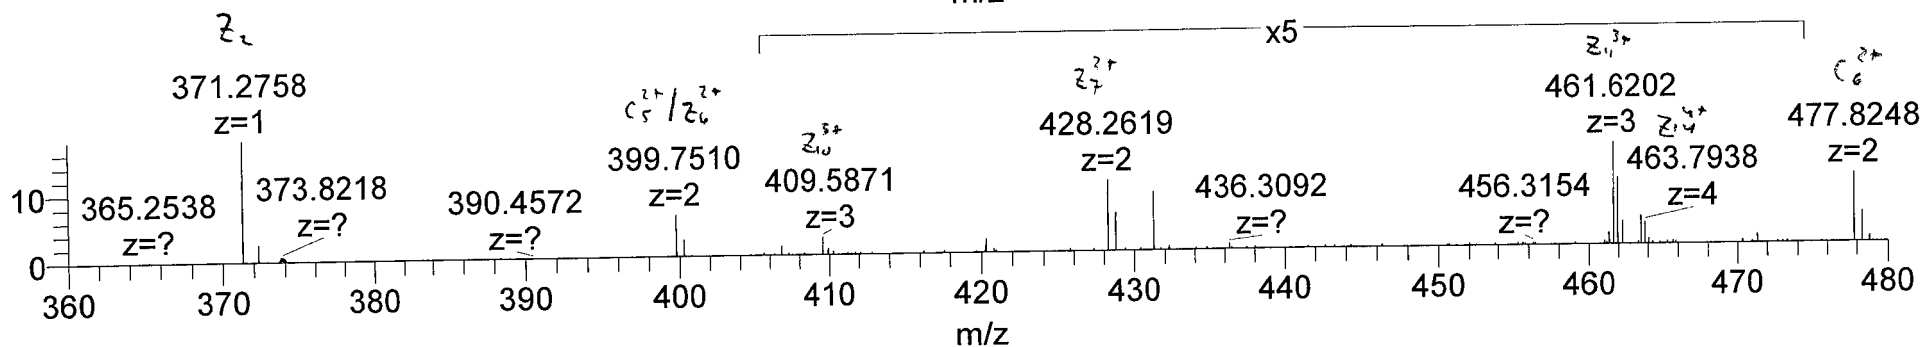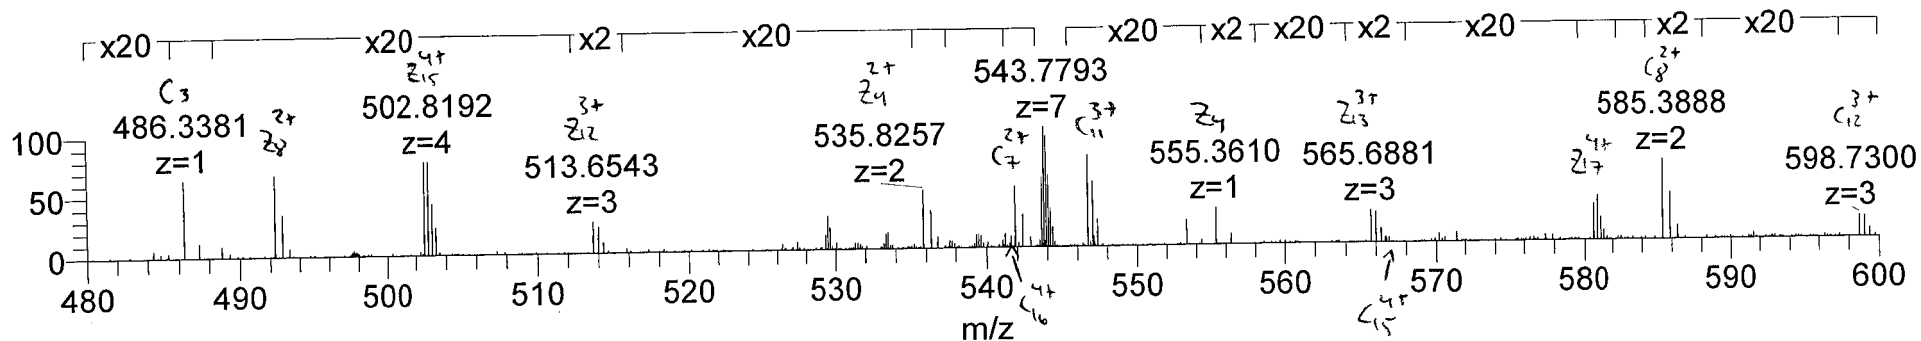

021519\_0p2perYellowTube\_Gradient\_DD\_Heat15 #2877-4039 RT: 12.14-15.39 AV: 16 NL: 5.83E4  
T: FTMS + p NSI d Full ms2 543.9236@etd8.70 [120.0000-2000.0000]

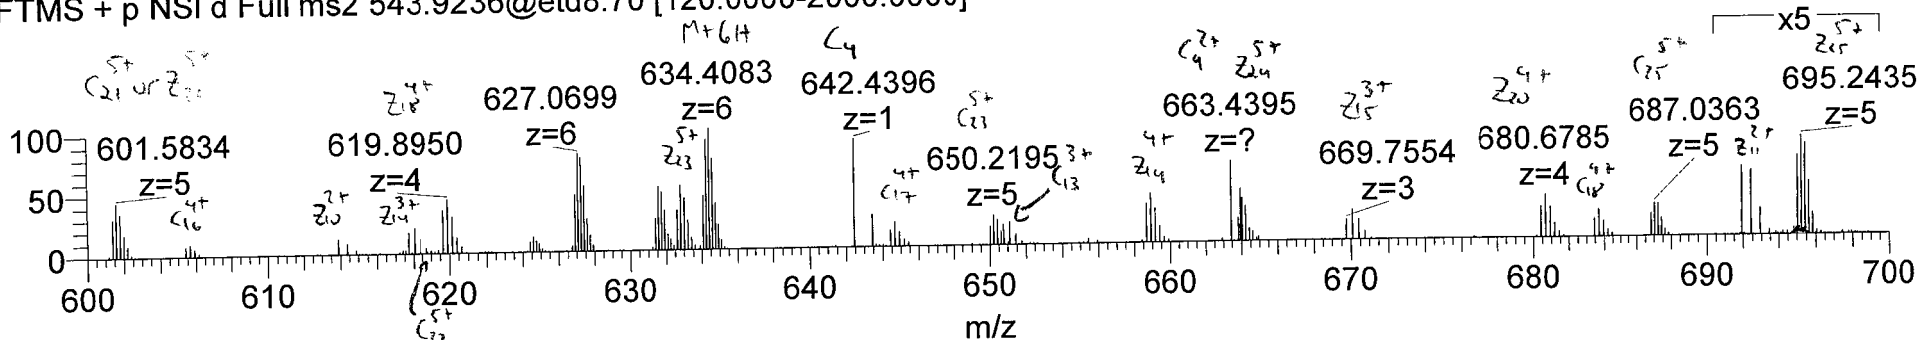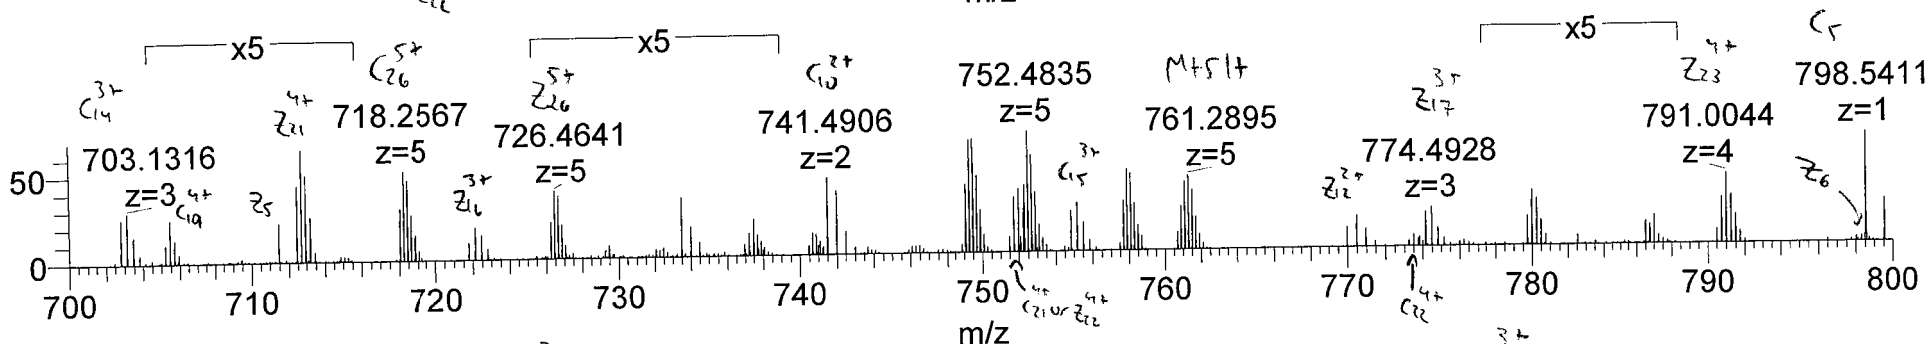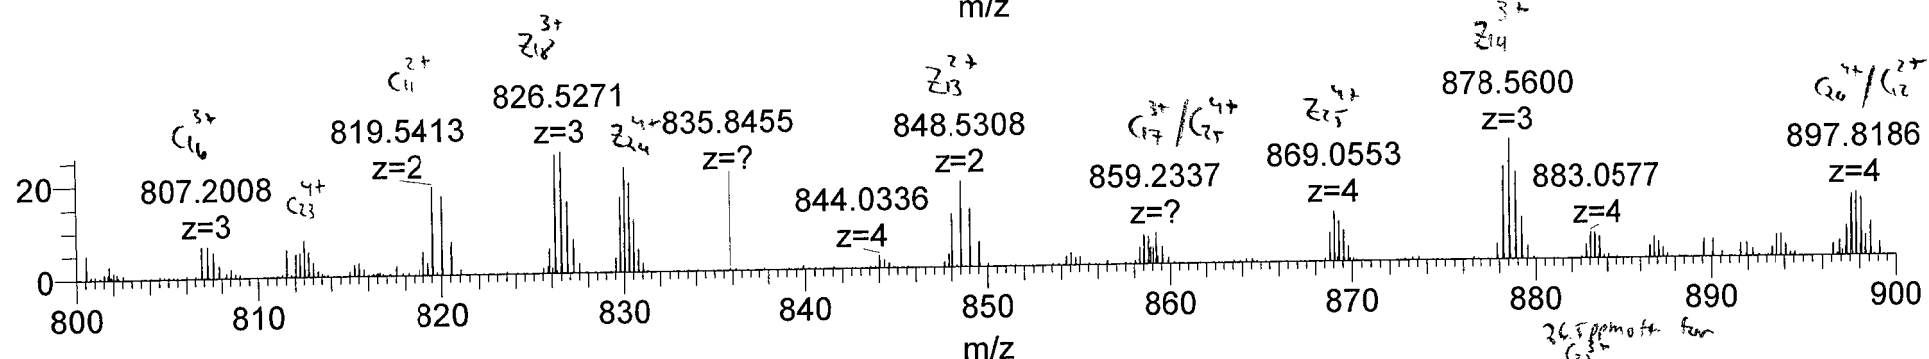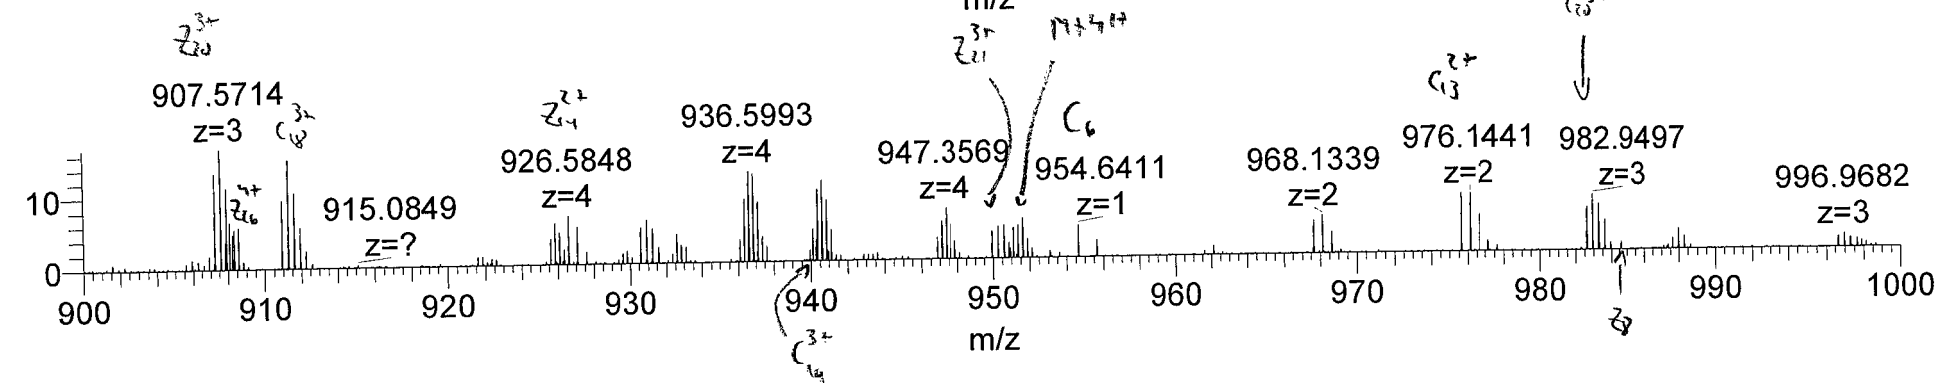

021519\_0p2perYellowTube\_Gradient\_DD\_Heat15 #2877-4039 RT: 12.14-15.39 AV: 16 NL: 6.45E3  
T: FTMS + p NSI d Full ms2 543.9236@etd8.70 [120.0000-2000.0000]

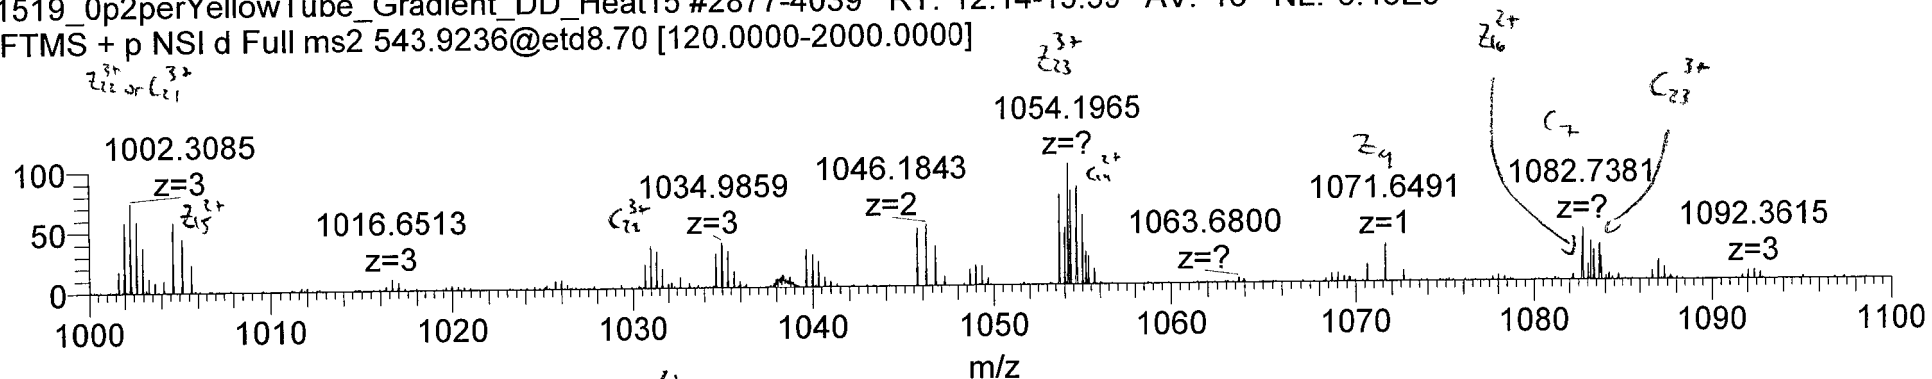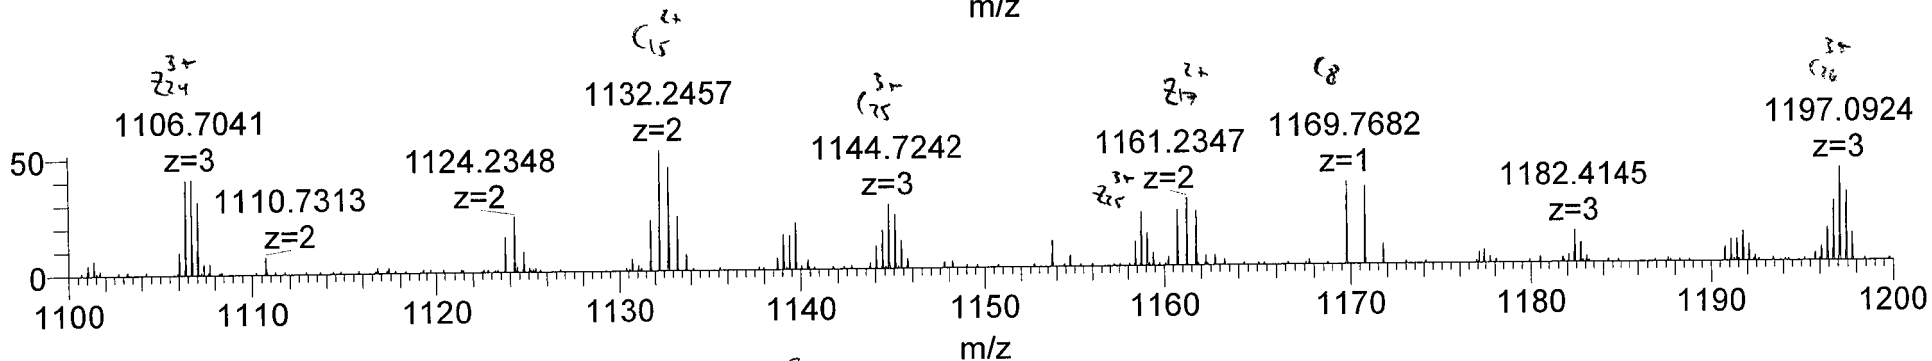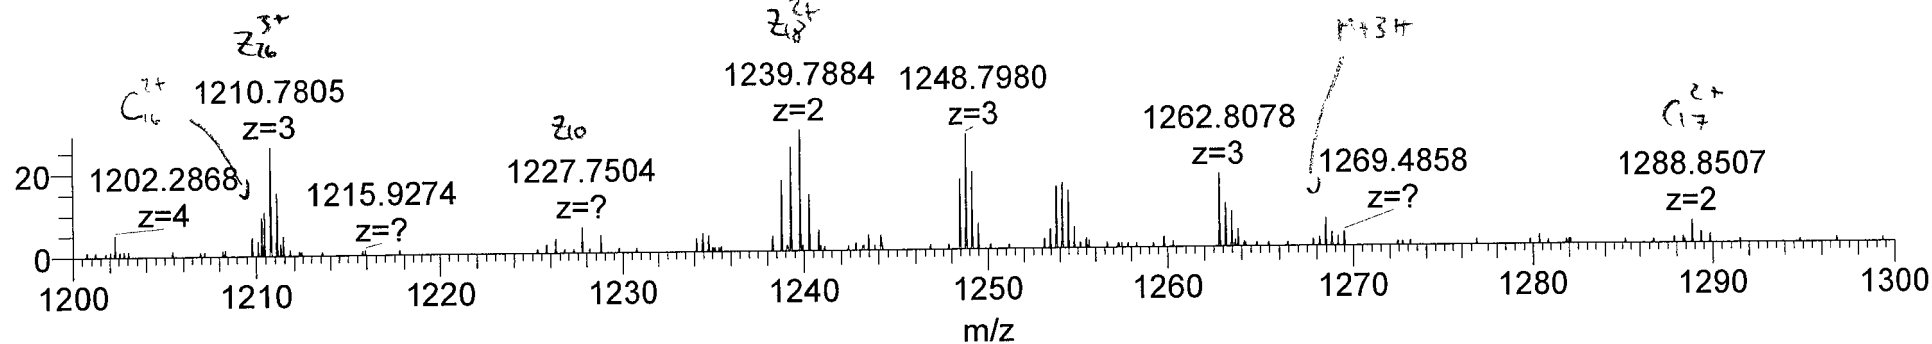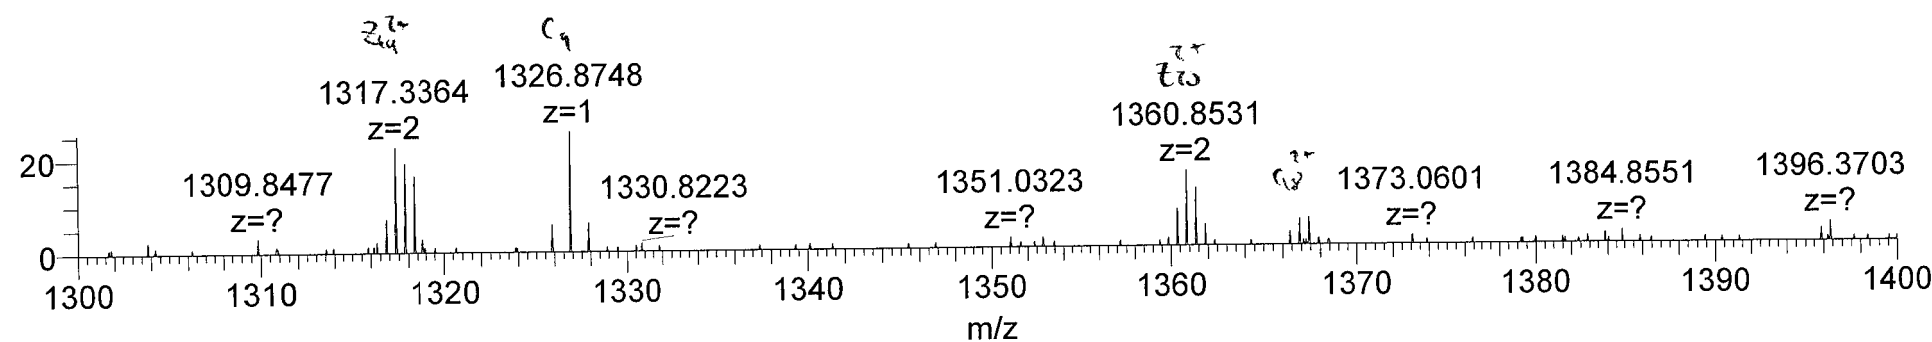

021519\_0p2perYellowTube\_Gradient\_DD\_Heat15 #2877-4039 RT: 12.14-15.39 AV: 16 NL: 6.57E2  
T: FTMS + p NSI d Full ms2 543.9236@etd8.70 [120.0000-2000.0000]

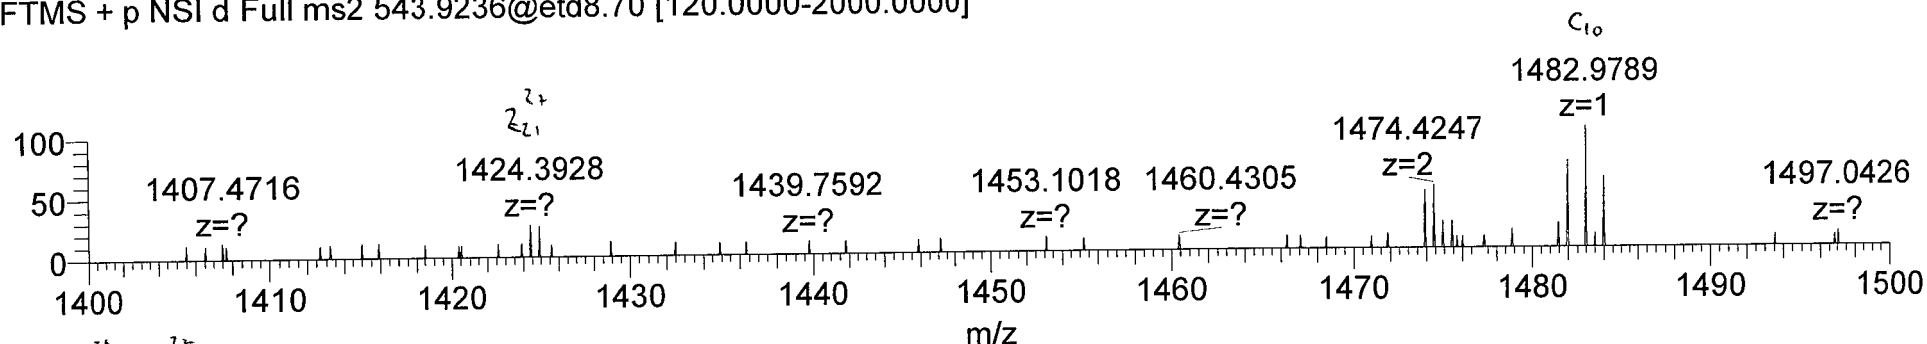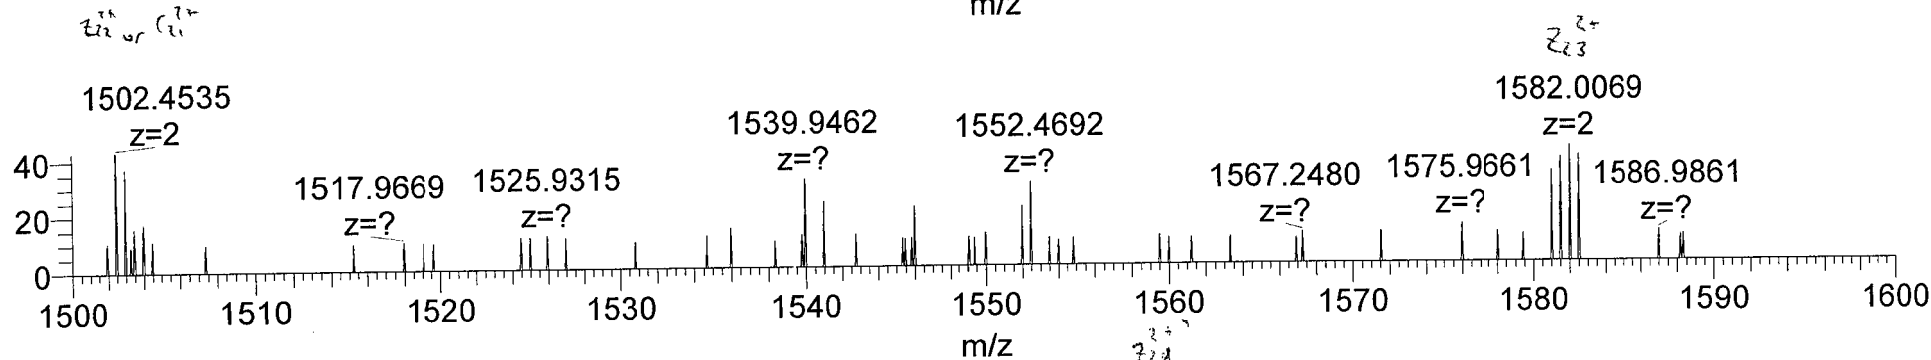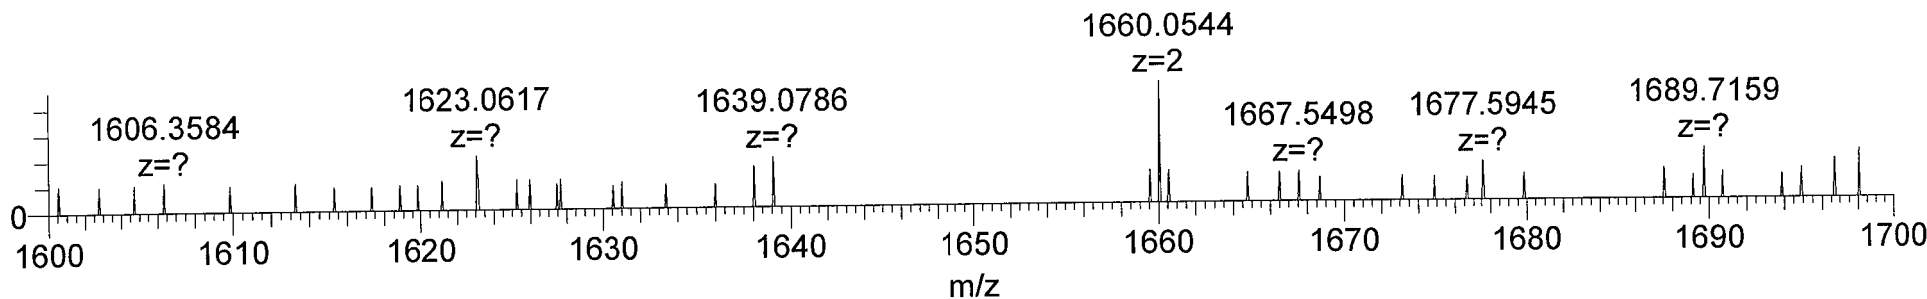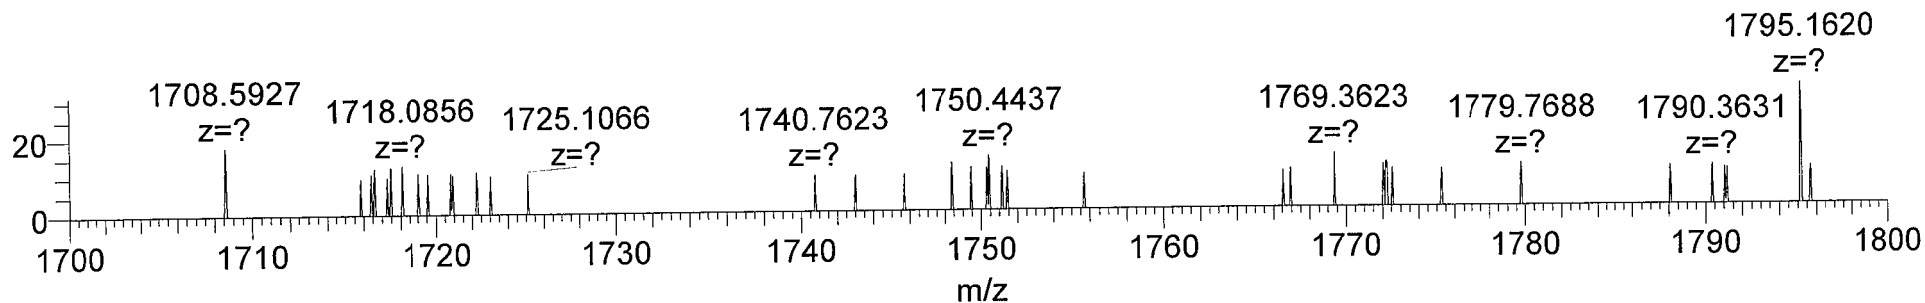

# Fragment Masses

| +6 c ions | +5 c ions | +4 c ions | +3 c ions | +2 c ions | +1 c ions | Sequence | +1 z ions | +2 z ions | +3 z ions | +4 z ions | +5 z ions | +6 z ions |
|-----------|-----------|-----------|-----------|-----------|-----------|----------|-----------|-----------|-----------|-----------|-----------|-----------|
| 29.8619   | 35.6328   | 44.2892   | 58.7165   | 87.5711   | 174.1349  | 1        | 3799.4052 | 1900.2062 | 1267.1399 | 950.6068  | 760.6869  | 634.0736  |
| 55.8787   | 66.8530   | 83.3145   | 110.7502  | 165.6217  | 330.2360  | 2        | 3627.2854 | 1814.1463 | 1209.7666 | 907.5768  | 728.2629  | 605.3870  |
| 81.8956   | 98.0733   | 122.3397  | 162.7839  | 243.6722  | 486.3372  | 3        | 3471.1843 | 1736.0958 | 1157.7329 | 868.5515  | 695.0427  | 579.3701  |
| 107.9124  | 129.2935  | 161.3650  | 214.8176  | 321.7228  | 642.4383  | 4        | 3315.0832 | 1658.0452 | 1105.6992 | 829.5262  | 663.8225  | 553.3533  |
| 133.9293  | 160.5137  | 200.3903  | 266.8513  | 399.7733  | 798.5394  | 5        | 3158.9821 | 1579.9947 | 1053.6655 | 790.5010  | 632.6022  | 527.3364  |
| 159.9461  | 191.7339  | 239.4156  | 318.8850  | 477.8239  | 954.8405  | 6        | 3002.8809 | 1501.9441 | 1001.6318 | 751.4757  | 601.3820  | 501.3196  |
| 181.2953  | 217.3529  | 271.4393  | 361.5833  | 541.8714  | 1082.7355 | 7        | 2846.7798 | 1423.8936 | 949.5981  | 712.4504  | 570.1618  | 475.3027  |
| 195.8006  | 234.7593  | 293.1973  | 390.5940  | 585.3874  | 1169.7675 | 8        | 2718.6849 | 1359.8461 | 906.8998  | 680.4267  | 544.5428  | 453.9535  |
| 221.8175  | 265.9795  | 332.2226  | 442.6277  | 663.4379  | 1325.8686 | 9        | 2631.6528 | 1316.3301 | 877.8891  | 658.6687  | 527.1364  | 439.4482  |
| 247.8343  | 297.1998  | 371.2479  | 494.6614  | 741.4885  | 1481.9697 | 10       | 2475.5517 | 1238.2795 | 825.8554  | 619.6434  | 495.9162  | 413.4314  |
| 273.8512  | 328.4200  | 410.2732  | 546.6951  | 819.5390  | 1638.0708 | 11       | 2319.4506 | 1160.2289 | 773.8217  | 580.6181  | 464.6959  | 387.4145  |
| 299.8681  | 359.6402  | 449.2964  | 598.7288  | 897.5896  | 1794.1719 | 12       | 2163.3495 | 1082.1784 | 721.7880  | 541.5928  | 433.4757  | 361.3976  |
| 325.8849  | 390.8604  | 488.3237  | 650.7625  | 975.6402  | 1950.2730 | 13       | 2007.2484 | 1004.1278 | 669.7543  | 502.5676  | 402.2555  | 335.3808  |
| 351.9018  | 422.0807  | 527.3490  | 702.7962  | 1053.6907 | 2106.3741 | 14       | 1851.1473 | 926.0773  | 617.7206  | 463.5423  | 371.0353  | 309.3639  |
| 377.9186  | 453.3009  | 566.3743  | 754.8299  | 1131.7413 | 2262.4753 | 15       | 1695.0462 | 848.0267  | 565.6869  | 424.5170  | 339.8151  | 283.3471  |
| 403.9355  | 484.5211  | 605.3995  | 806.8636  | 1209.7918 | 2418.5764 | 16       | 1538.9451 | 769.9762  | 513.6532  | 385.4917  | 308.5948  | 257.3302  |
| 429.9523  | 515.7413  | 644.4248  | 858.8973  | 1287.8424 | 2574.6775 | 17       | 1382.8439 | 691.9256  | 461.6195  | 346.4664  | 277.3746  | 231.3134  |
| 455.9692  | 546.9615  | 683.4501  | 910.9310  | 1365.8929 | 2730.7786 | 18       | 1226.7428 | 613.8751  | 409.5858  | 307.4412  | 246.1544  | 205.2965  |
| 470.4745  | 564.3679  | 705.2081  | 939.9417  | 1409.4089 | 2817.8106 | 19       | 1070.6417 | 535.8245  | 357.5521  | 268.4159  | 214.9342  | 179.2797  |
| 491.8237  | 589.9869  | 737.2319  | 982.6400  | 1473.4564 | 2945.9056 | 20       | 983.6097  | 492.3085  | 328.5414  | 246.6579  | 197.5278  | 164.7743  |
| 501.3272  | 601.3912  | 751.4872  | 1001.6472 | 1501.9672 | 3002.9270 | 21       | 855.5147  | 428.2610  | 285.8431  | 214.6341  | 171.9088  | 143.4252  |
| 515.8326  | 618.7976  | 773.2452  | 1030.6579 | 1545.4832 | 3089.9591 | 22       | 788.4933  | 399.7503  | 266.8359  | 200.3788  | 160.5045  | 133.9216  |
| 541.8494  | 650.0179  | 812.2705  | 1082.6916 | 1623.5337 | 3248.0602 | 23       | 711.4612  | 356.2343  | 237.8253  | 178.6208  | 143.0981  | 119.4163  |
| 556.3548  | 667.4243  | 834.0285  | 1111.7023 | 1667.0497 | 3333.0922 | 24       | 555.3601  | 278.1837  | 185.7916  | 139.5955  | 111.8778  | 93.3994   |
| 572.5302  | 686.8348  | 858.2917  | 1144.0532 | 1715.5761 | 3430.1450 | 25       | 468.3281  | 234.6677  | 156.7800  | 117.8375  | 94.4714   | 78.8941   |
| 598.5471  | 718.0550  | 897.3170  | 1196.0869 | 1793.6267 | 3586.2461 | 26       | 371.2753  | 186.1413  | 124.4300  | 93.5743   | 75.0609   | 62.7186   |
| 634.0736  | 760.6869  | 950.6068  | 1267.1399 | 1900.2062 | 3799.4052 | 27       | 215.1742  | 108.0908  | 72.3963   | 54.5490   | 43.8407   | 36.7018   |

56.074

021519\_0p2perYellowTube\_Rinse\_DD\_Heat15 #1358-2260 RT: 5.66-8.00 AV: 13 NL: 6.98E4  
T: FTMS + p NSI sid=40.00 d Full ms2 439.0706@etd5.26 [120.0000-2000.0000]

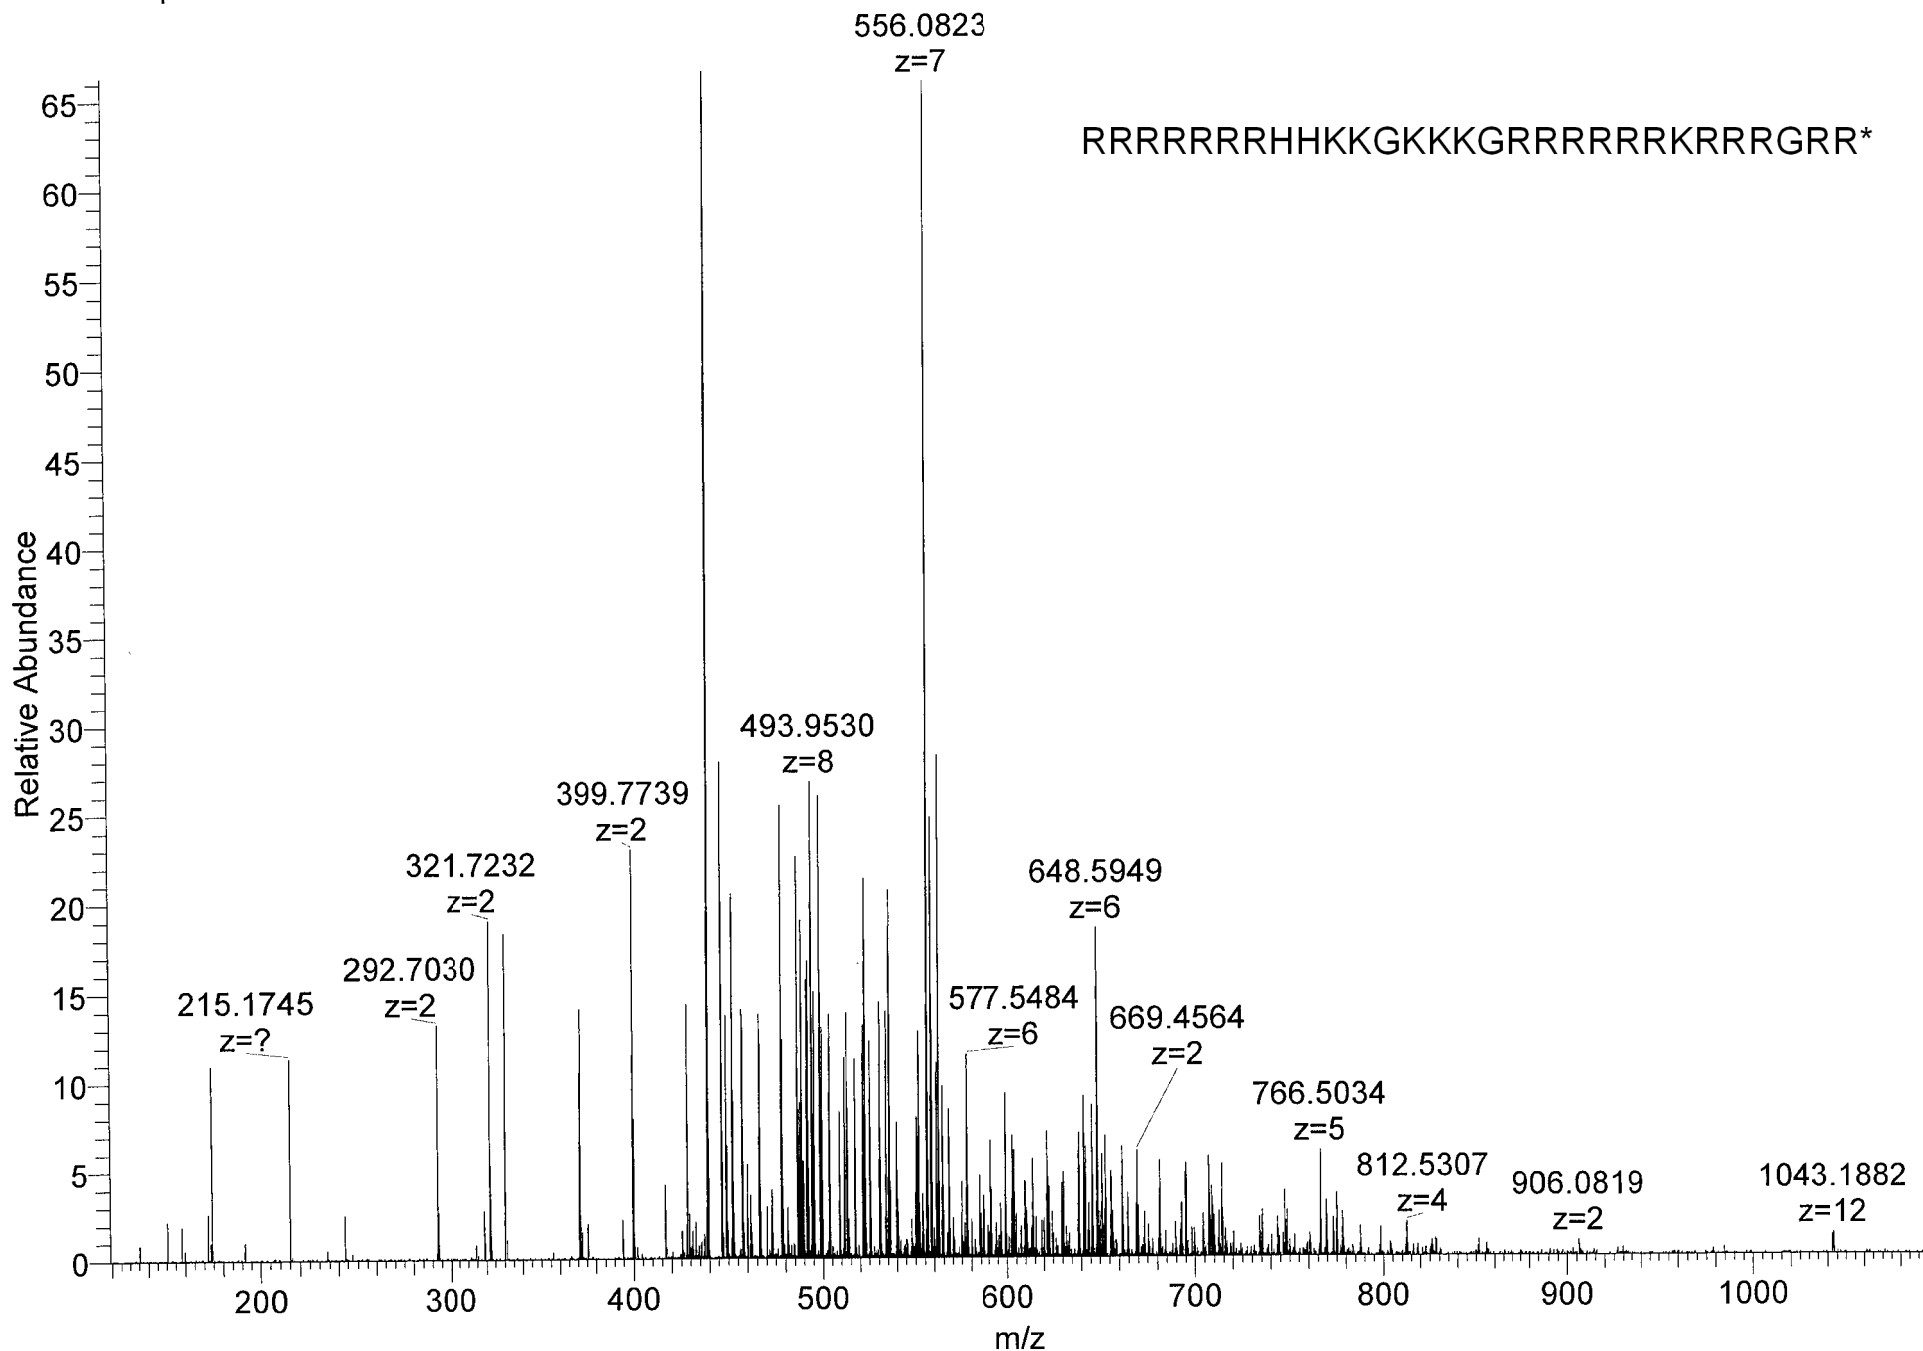



021519\_0p2perYellowTube\_Rinse\_DD\_Heat15 #1357-2260 RT: 5.66-8.00 AV: 13 NL: 6.98E4  
T: FTMS + p NSI sid=40.00 d Full ms2 439.0706@etd5.26 [120.0000-2000.0000]

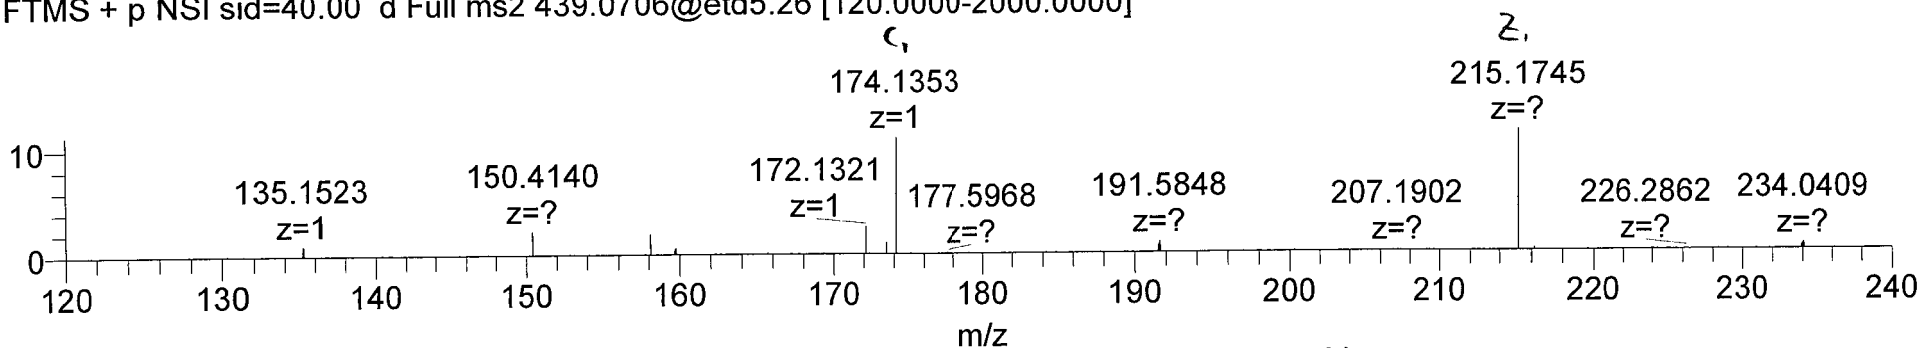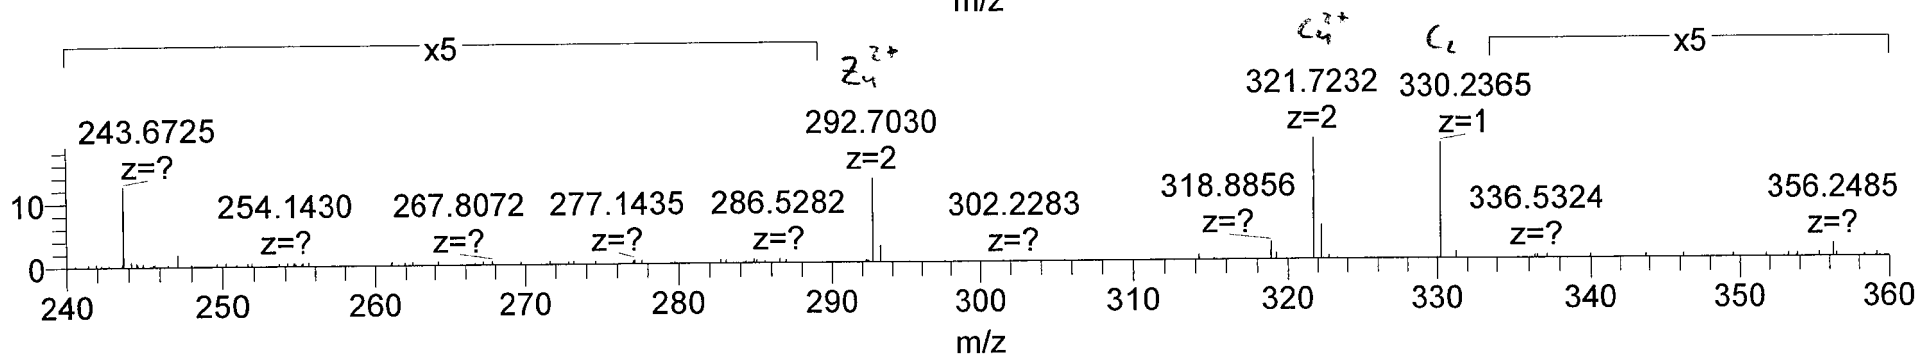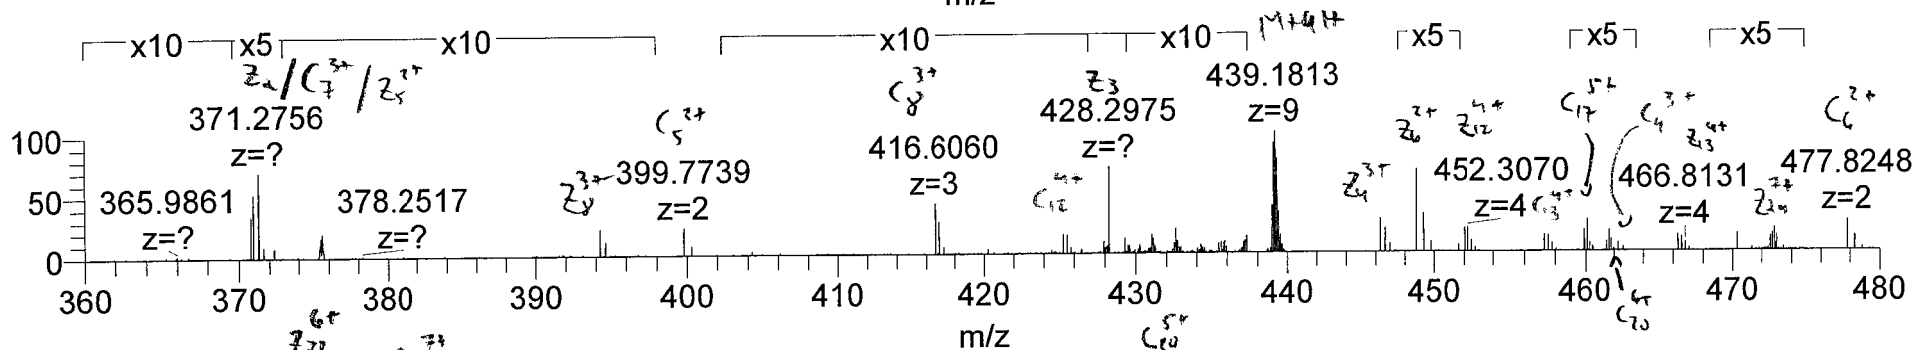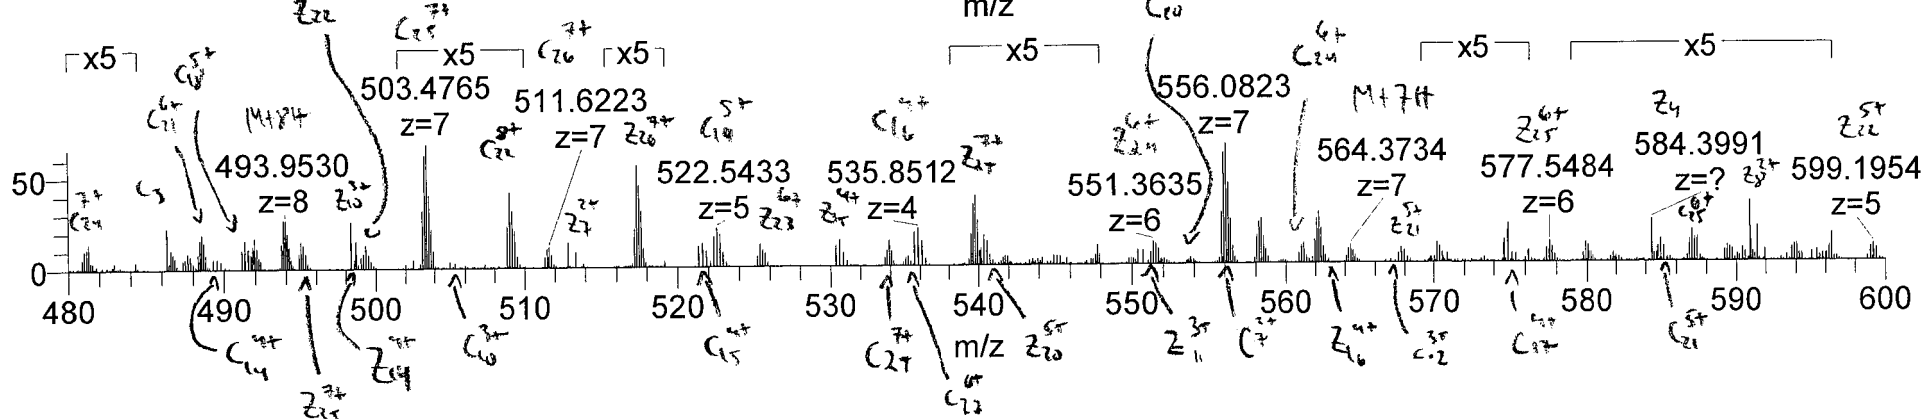

021519\_0p2perYellowTube\_Rinse\_DD\_Heat15 #1357-2260 RT: 5.66-8.00 AV: 13 NL: 1.29E4  
T: FTMS + p NSI sid=40.00 d Full ms2 439.0706@etd5.26 [120.0000-2000.0000]

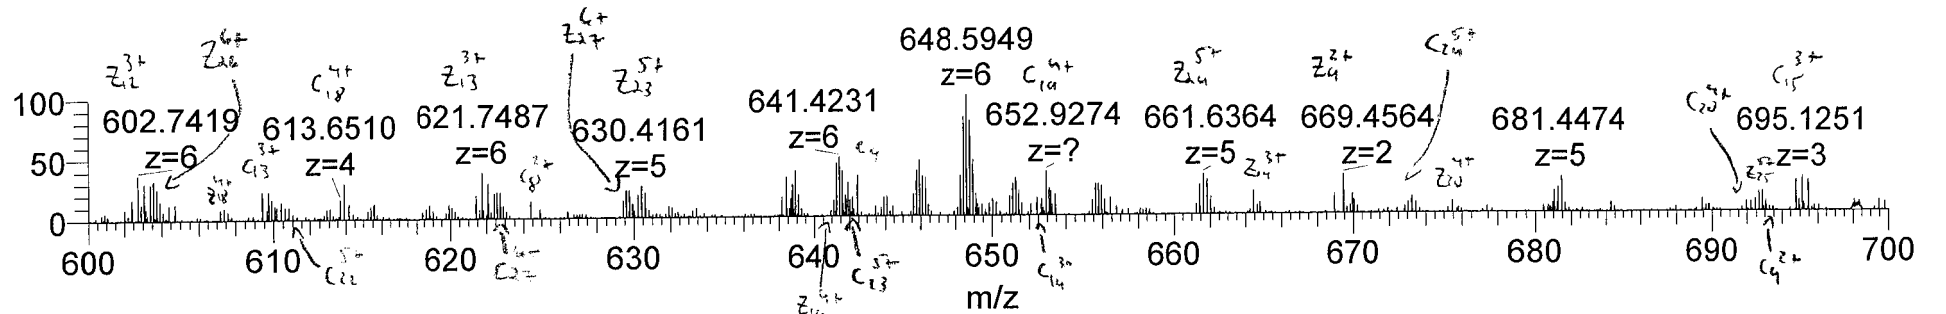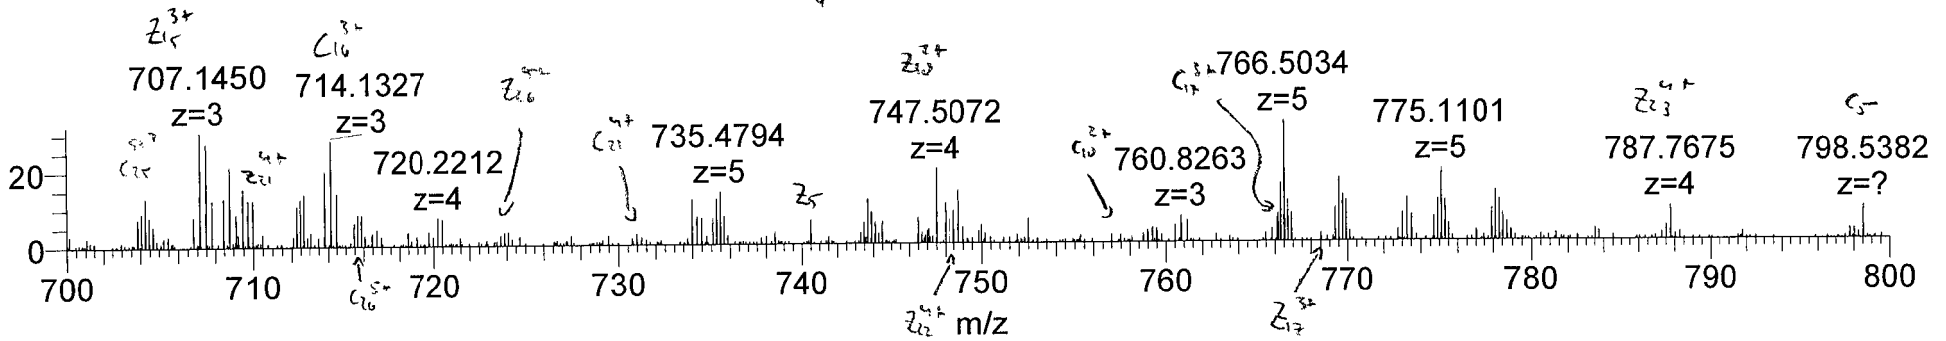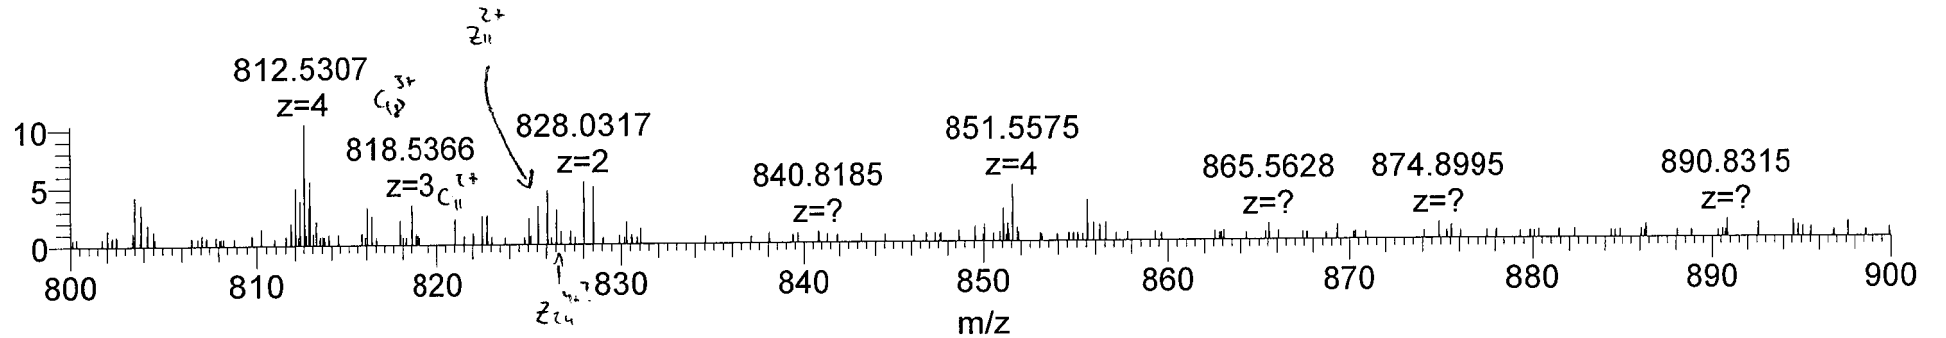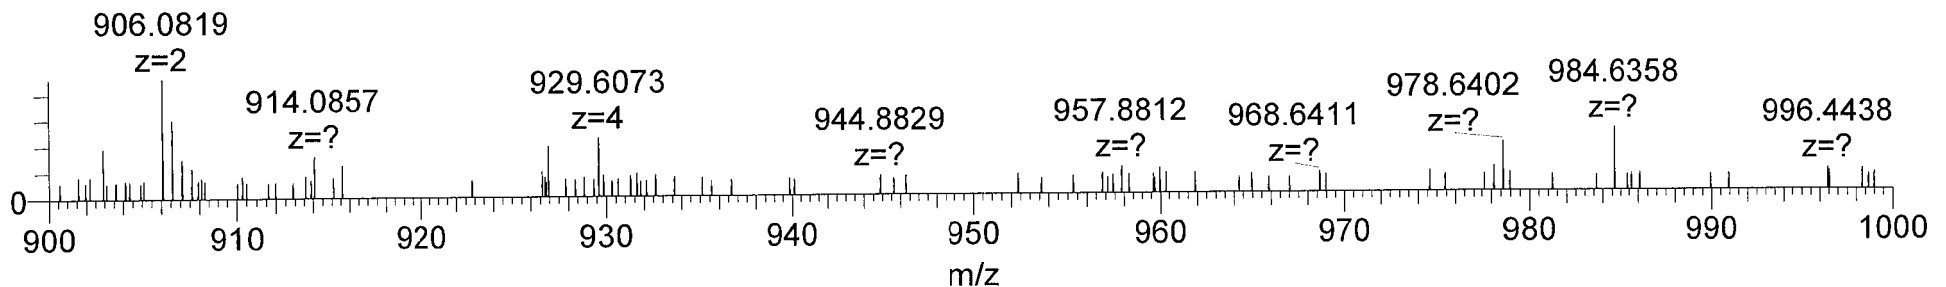

# Fragment Masses

| +7 c ions | +6 c ions | +5 c ions | +4 c ions | +3 c ions | +2 c ions | +1 c ions | Sequence | +1 z ions | +2 z ions | +3 z ions | +4 z ions | +5 z ions | +6 z ions | +7 z ions |
|-----------|-----------|-----------|-----------|-----------|-----------|-----------|----------|-----------|-----------|-----------|-----------|-----------|-----------|-----------|
| 25.7398   | 29.8619   | 35.6328   | 44.2892   | 58.7165   | 87.5711   | 174.1349  | 1        | 3942.5627 | 1971.7850 | 1314.8591 | 986.3961  | 789.3184  | 657.9332  | 564.0866  |
| 48.0400   | 55.8787   | 66.8530   | 83.3145   | 110.7502  | 165.6217  | 330.2360  | 2        | 3770.4429 | 1885.7251 | 1257.4858 | 943.3662  | 754.8944  | 629.2465  | 539.4981  |
| 70.3401   | 81.8956   | 98.0733   | 122.3397  | 162.7839  | 243.6722  | 486.3372  | 3        | 3614.3418 | 1807.6745 | 1205.4521 | 904.3409  | 723.6742  | 603.2297  | 517.1979  |
| 92.6403   | 107.9124  | 129.2935  | 161.3650  | 214.8176  | 321.7228  | 642.4383  | 4        | 3458.2407 | 1729.6240 | 1153.4184 | 865.3156  | 692.4540  | 577.2128  | 494.8978  |
| 114.9404  | 133.9293  | 160.5137  | 200.3903  | 266.8513  | 399.7733  | 798.5394  | 5        | 3302.1396 | 1651.5734 | 1101.3847 | 826.2803  | 661.2337  | 551.1960  | 472.5976  |
| 137.2406  | 159.9461  | 191.7339  | 239.4156  | 318.8850  | 477.8239  | 954.6405  | 6        | 3146.0384 | 1573.5229 | 1049.3510 | 787.2651  | 630.0135  | 525.1791  | 450.2974  |
| 159.5408  | 185.9630  | 222.9541  | 278.4409  | 370.9187  | 555.8744  | 1110.7416 | 7        | 2989.9373 | 1495.4723 | 997.3173  | 748.2398  | 598.7933  | 499.1623  | 427.9973  |
| 179.1206  | 208.8061  | 250.3659  | 312.7056  | 416.6050  | 624.4039  | 1247.8005 | 8        | 2833.8362 | 1417.4217 | 945.2836  | 709.2145  | 567.5731  | 473.1454  | 405.6971  |
| 198.7004  | 231.6493  | 277.7777  | 346.9703  | 462.2913  | 692.9334  | 1384.8594 | 9        | 2696.7773 | 1348.8923 | 899.5973  | 674.9498  | 540.1813  | 450.3023  | 386.1173  |
| 216.9987  | 252.9985  | 303.3967  | 378.9941  | 504.9896  | 756.9808  | 1512.9544 | 10       | 2559.7184 | 1280.3628 | 853.9110  | 640.6851  | 512.7495  | 427.4591  | 359.5374  |
| 235.2980  | 274.3476  | 329.0157  | 411.0178  | 547.6880  | 821.0283  | 1641.0494 | 11       | 2431.6234 | 1216.3154 | 811.2127  | 608.6613  | 487.1305  | 406.1100  | 348.2382  |
| 243.4449  | 283.8512  | 340.4200  | 425.2732  | 566.8951  | 849.5360  | 1698.0708 | 12       | 2303.5285 | 1152.2679 | 768.5143  | 576.6376  | 461.5115  | 384.7608  | 329.9389  |
| 261.7442  | 305.2004  | 366.0390  | 457.2959  | 609.3934  | 913.5865  | 1826.1658 | 13       | 2246.5070 | 1123.7571 | 749.6072  | 562.3822  | 450.1072  | 375.2572  | 321.7930  |
| 280.0435  | 328.5495  | 391.8580  | 489.3206  | 652.0918  | 977.6340  | 1954.2607 | 14       | 2118.4120 | 1058.7097 | 706.8088  | 530.3585  | 424.4882  | 353.9081  | 303.4937  |
| 298.3428  | 347.8987  | 417.2770  | 521.3444  | 694.7901  | 1041.6815 | 2082.3557 | 15       | 1990.3171 | 995.6622  | 664.1105  | 498.3347  | 398.8692  | 332.5589  | 285.1944  |
| 306.4887  | 357.4023  | 428.6813  | 535.5997  | 713.7972  | 1070.1922 | 2139.3772 | 16       | 1862.2221 | 931.6147  | 621.4122  | 466.3110  | 373.2502  | 311.2097  | 268.8951  |
| 328.7888  | 383.4191  | 459.9015  | 574.6250  | 765.8309  | 1148.2428 | 2295.4783 | 17       | 1805.2007 | 903.1040  | 602.4051  | 452.0556  | 361.8460  | 301.7062  | 258.7492  |
| 351.0890  | 409.4360  | 491.1217  | 613.6503  | 817.8646  | 1226.2933 | 2451.5794 | 18       | 1649.0995 | 825.0534  | 550.3714  | 413.0303  | 330.6257  | 275.6893  | 236.4490  |
| 373.3892  | 435.4528  | 522.3419  | 652.6756  | 869.8984  | 1304.3439 | 2607.6805 | 19       | 1492.9984 | 747.0028  | 498.3377  | 374.0051  | 299.4055  | 249.6725  | 214.1469  |
| 395.6893  | 461.4697  | 553.5621  | 691.7009  | 921.9321  | 1382.3944 | 2763.7816 | 20       | 1336.8973 | 668.9523  | 446.3040  | 334.8798  | 268.1853  | 223.6558  | 191.8467  |
| 417.9895  | 487.4865  | 584.7824  | 730.7261  | 973.9658  | 1460.4450 | 2919.8827 | 21       | 1180.7962 | 590.9017  | 364.2703  | 295.9545  | 236.9651  | 197.6388  | 169.5486  |
| 436.2888  | 508.8357  | 610.4014  | 762.7499  | 1016.6641 | 1524.4925 | 3047.9777 | 22       | 1024.6951 | 512.8512  | 342.2366  | 256.9292  | 205.7448  | 171.6219  | 147.2484  |
| 458.5889  | 534.8525  | 641.6216  | 801.7752  | 1068.6978 | 1602.5430 | 3204.0788 | 23       | 866.6001  | 448.8037  | 289.5382  | 224.9055  | 180.1258  | 150.2728  | 128.9491  |
| 480.8891  | 560.8694  | 672.8418  | 840.8004  | 1120.7315 | 1680.5936 | 3360.1799 | 24       | 740.4990  | 370.7532  | 247.5045  | 185.8802  | 148.9056  | 124.2559  | 106.6490  |
| 503.1892  | 586.8862  | 704.0620  | 879.8257  | 1172.7652 | 1758.6441 | 3516.2810 | 25       | 584.3979  | 292.7026  | 195.4708  | 146.8549  | 117.8654  | 98.2390   | 84.3488   |
| 511.3352  | 596.3898  | 715.4663  | 894.0811  | 1191.7723 | 1787.1549 | 3573.3025 | 26       | 428.2968  | 214.6520  | 124.4371  | 107.8297  | 86.4652   | 72.2222   | 62.0486   |
| 533.6353  | 622.4067  | 746.6865  | 933.1064  | 1243.8060 | 1865.2054 | 3729.4036 | 27       | 371.2753  | 186.1413  | 124.4300  | 93.5743   | 75.0609   | 62.7186   | 53.9027   |
| 564.0866  | 657.9332  | 789.3184  | 986.3961  | 1314.8591 | 1971.7850 | 3942.5627 | 28       | 215.1742  | 108.0908  | 72.3963   | 54.5490   | 43.8407   | 36.7018   | 31.6026   |



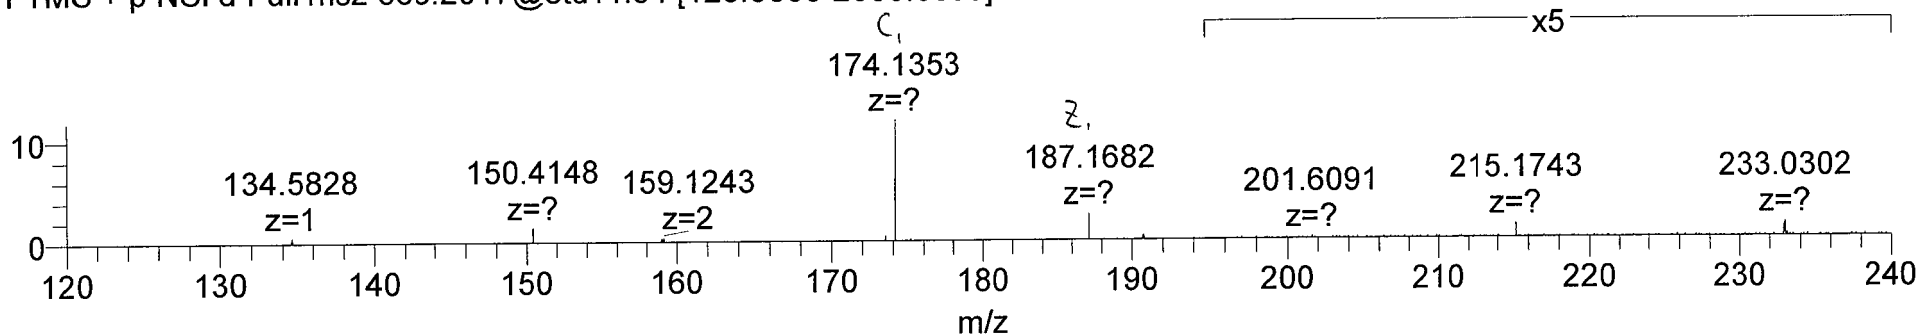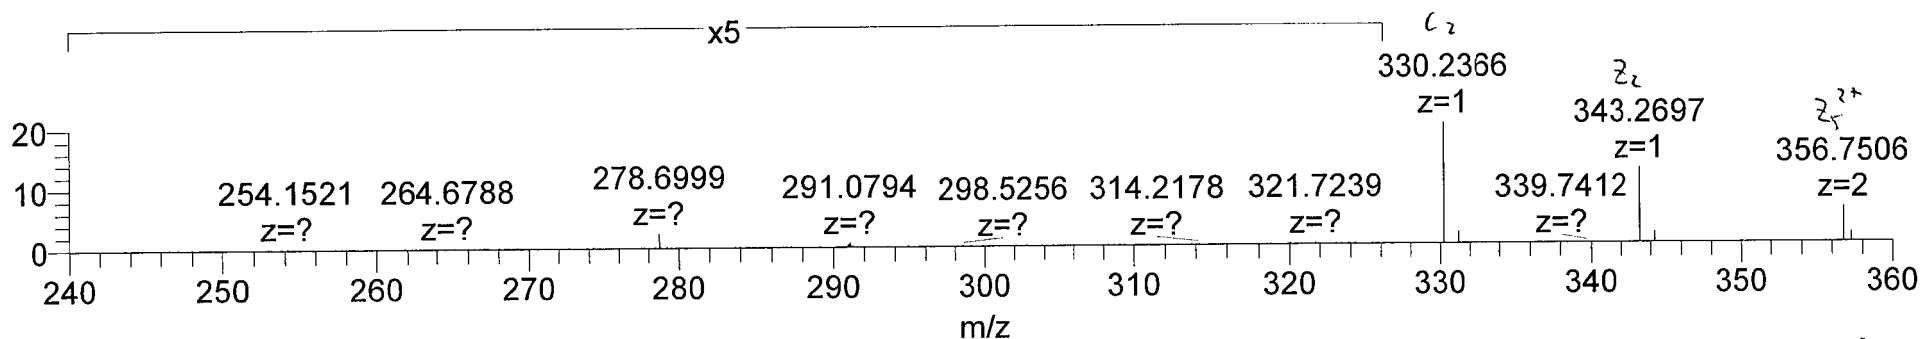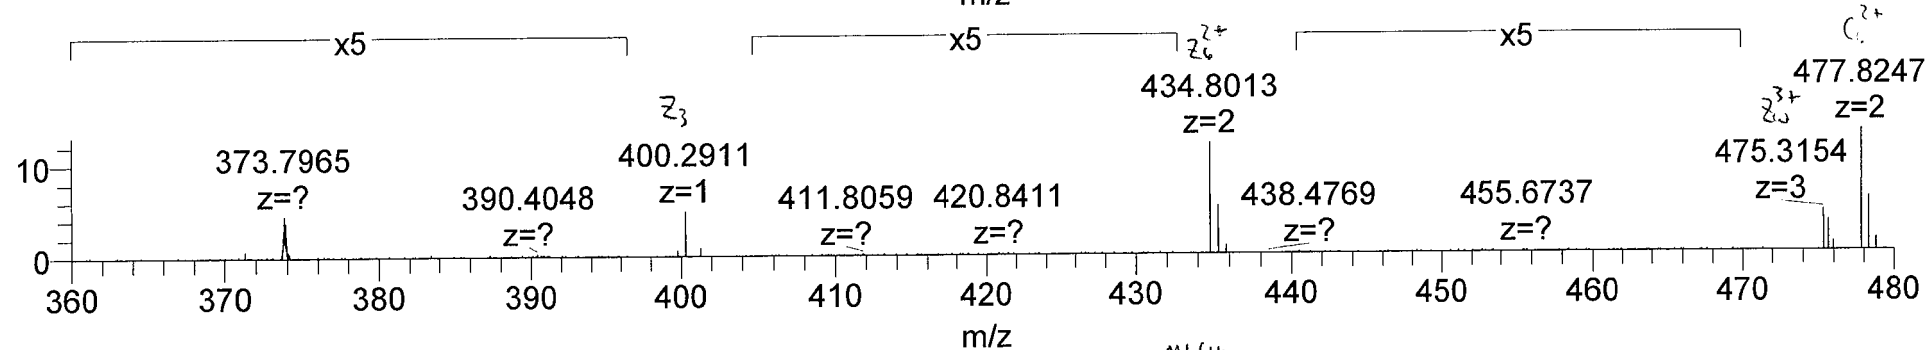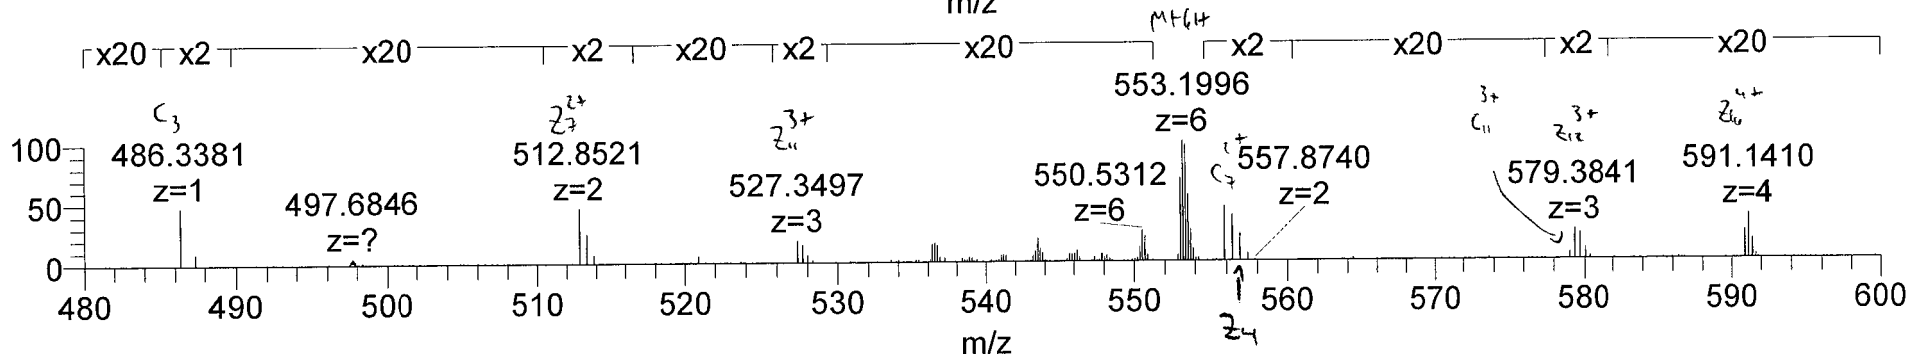

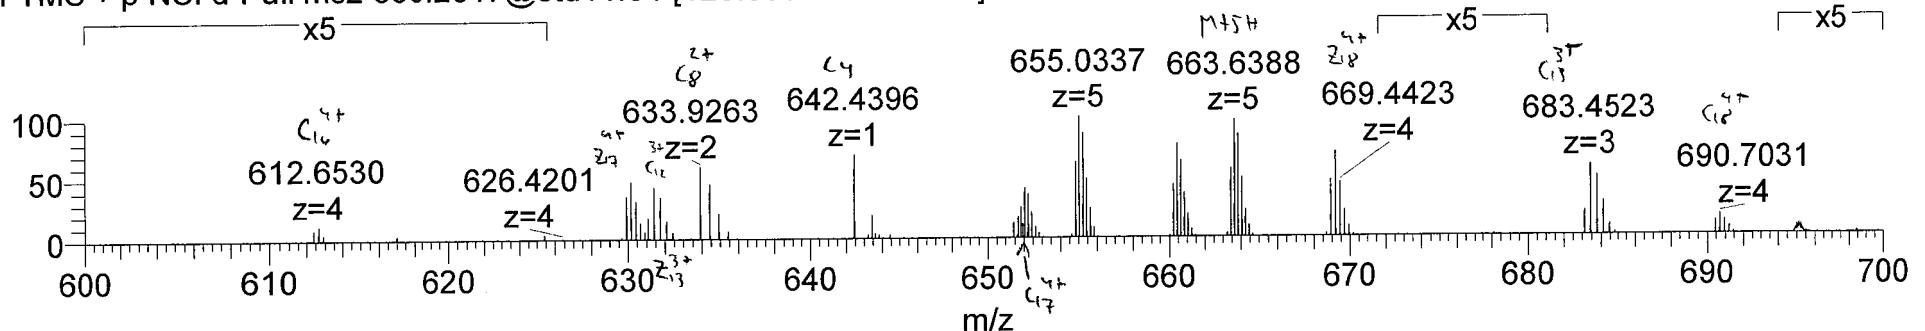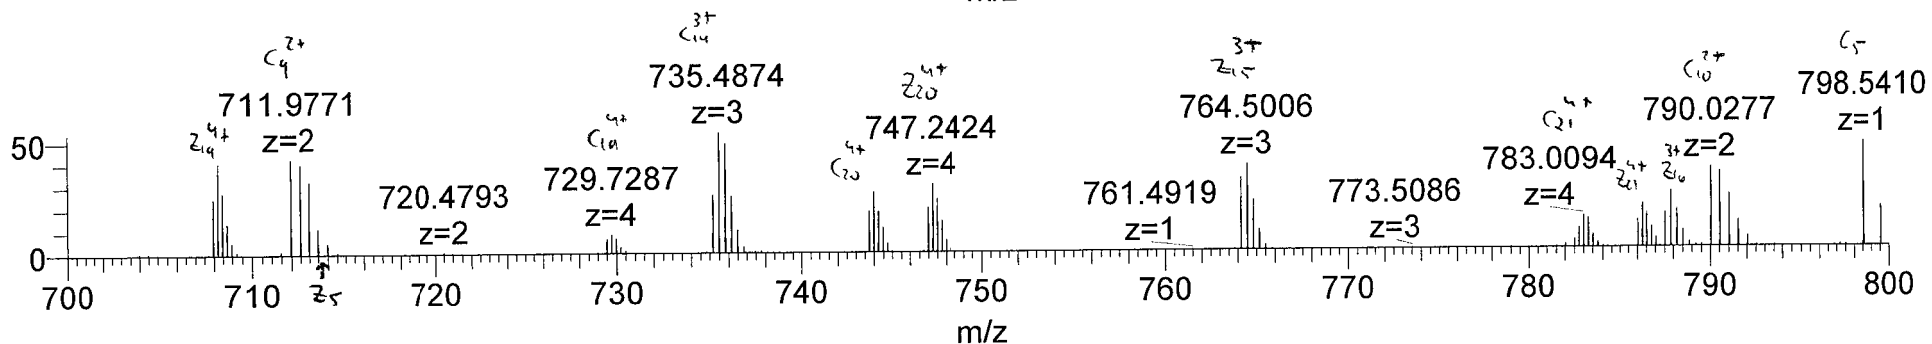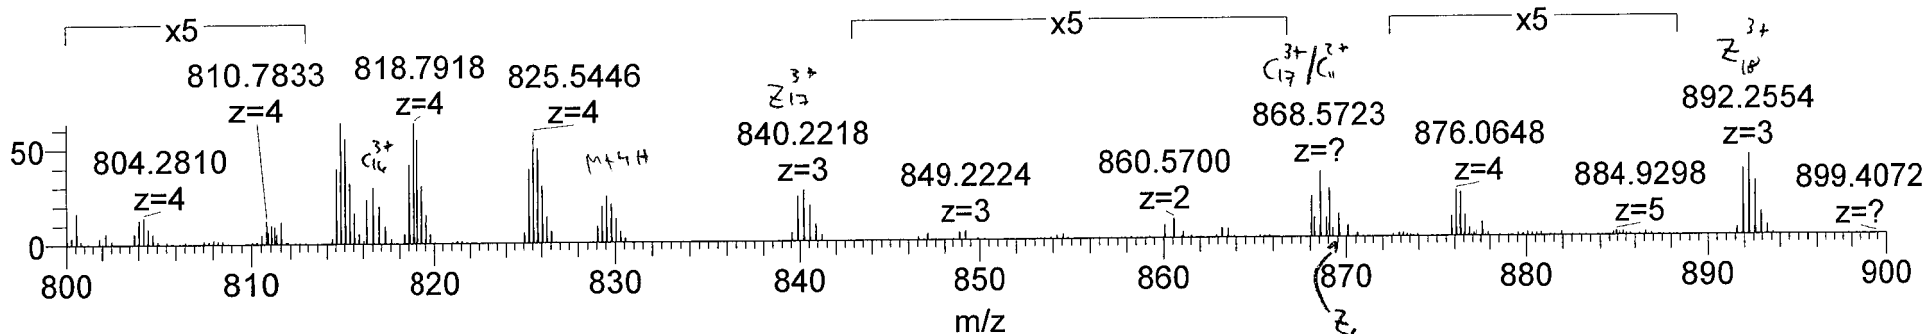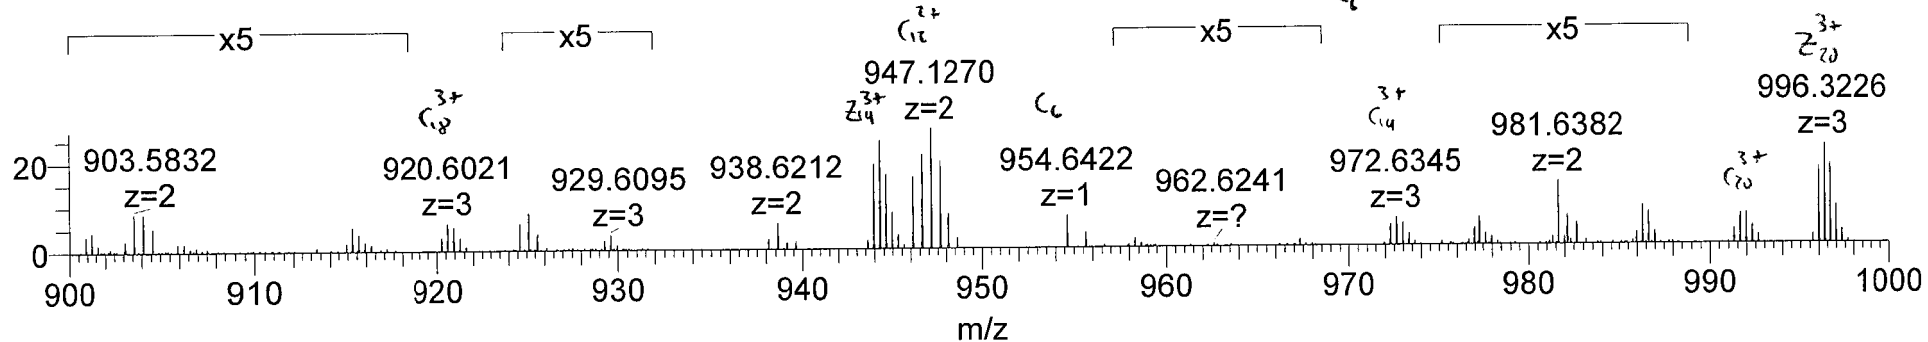

021519\_0p2perYellowTube\_Gradient\_DD\_Heat15 #2644-4489 RT: 11.35-16.61 AV: 28 NL: 1.15E4  
T: FTMS + p NSI d Full ms2 553.2017@etd11.84 [120.0000-2000.0000]

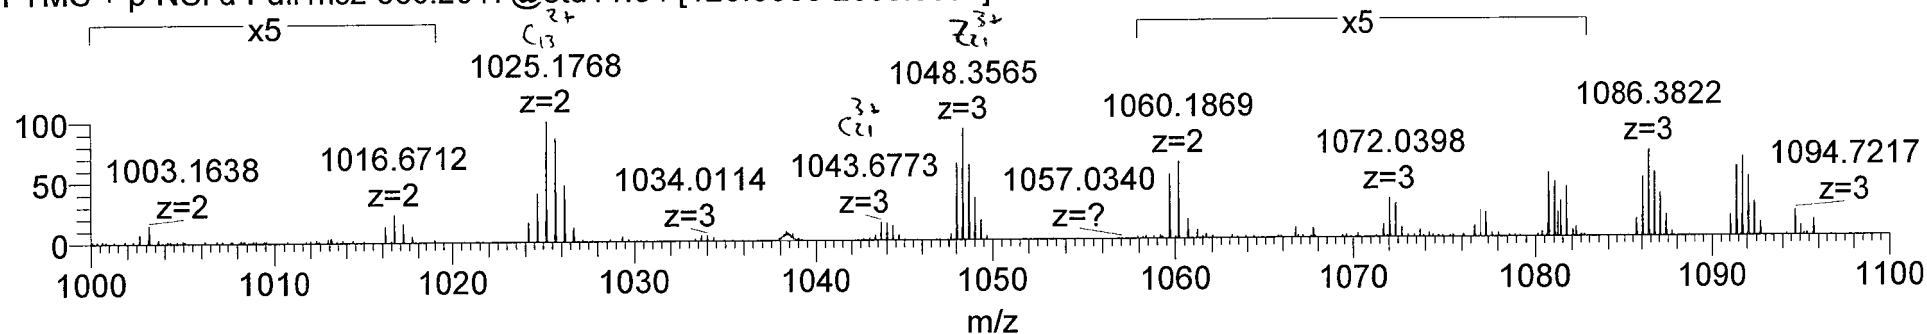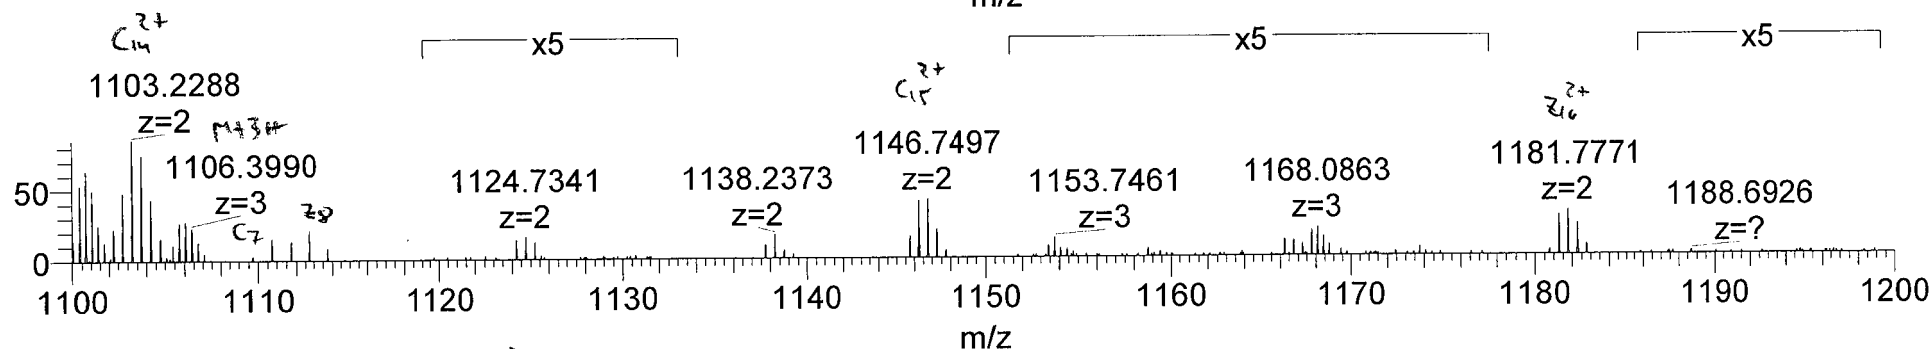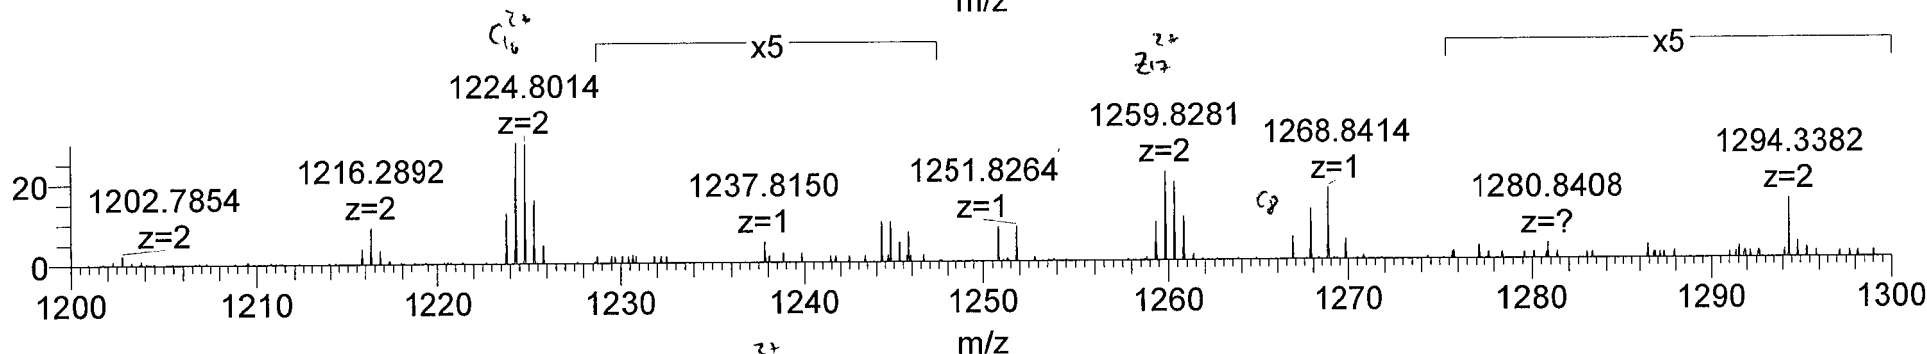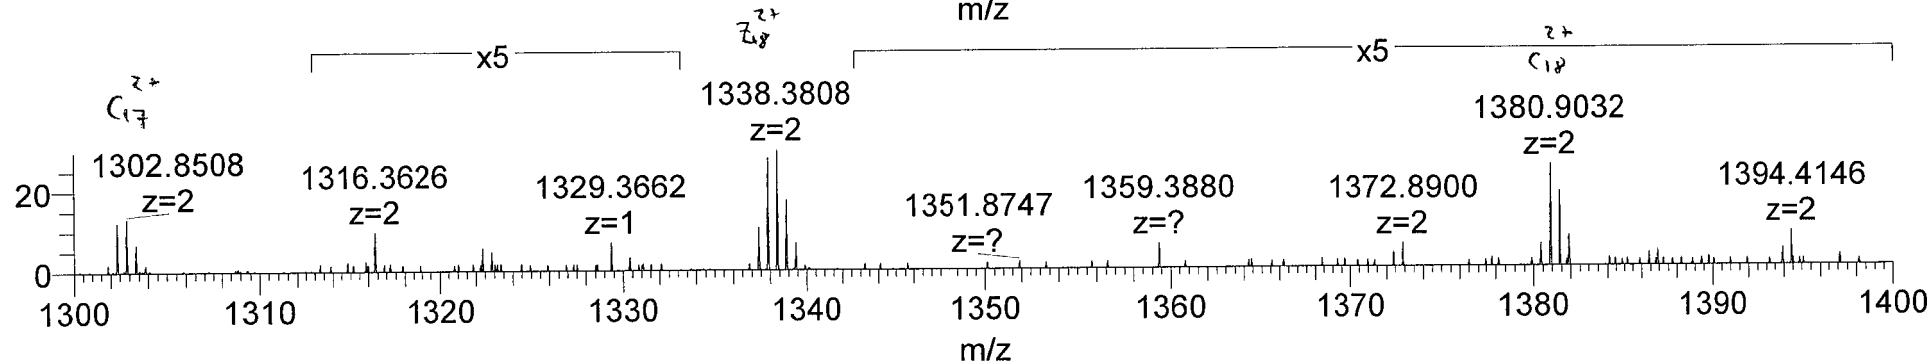

021519\_0p2perYellowTube\_Gradient\_DD\_Heat15 #2644-4489 RT: 11.35-16.61 AV: 28 NL: 2.21E3  
T: FTMS + p NSI d Full ms2 553.2017@etd11.84 [120.0000-2000.0000]

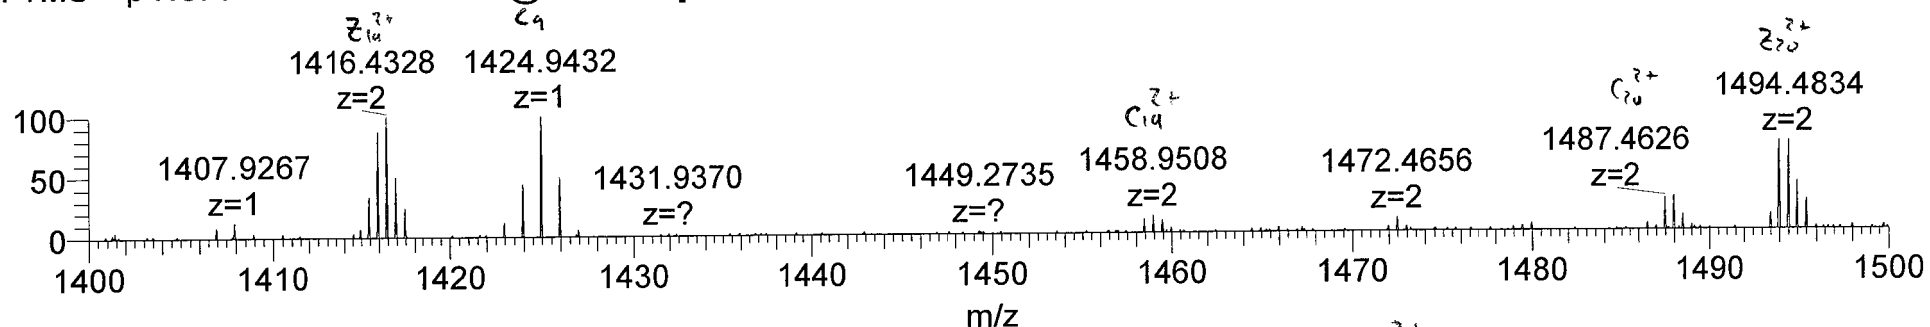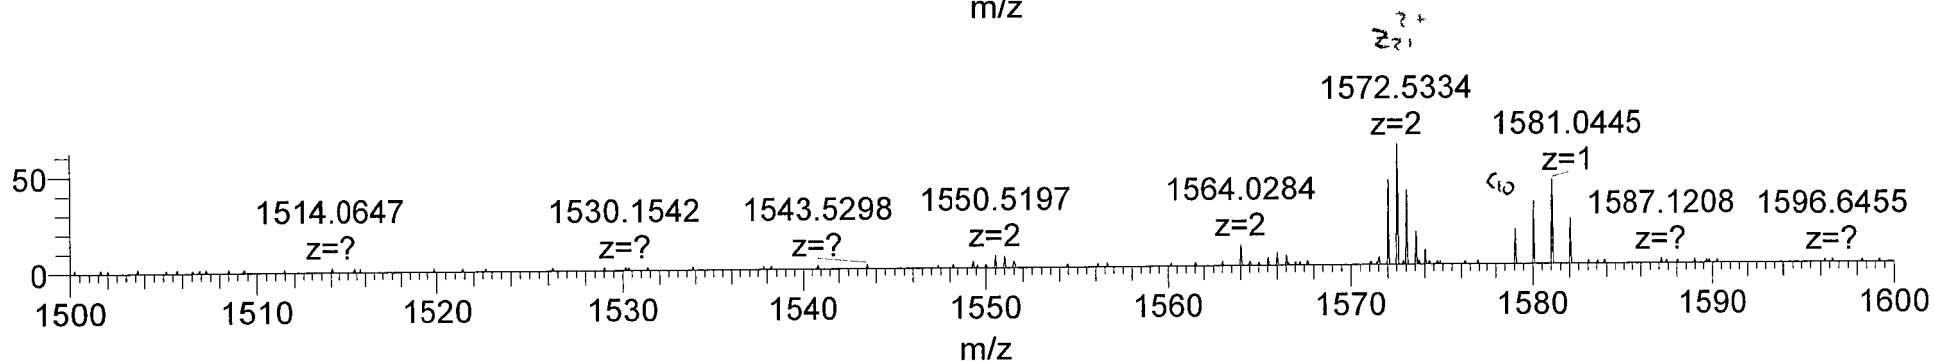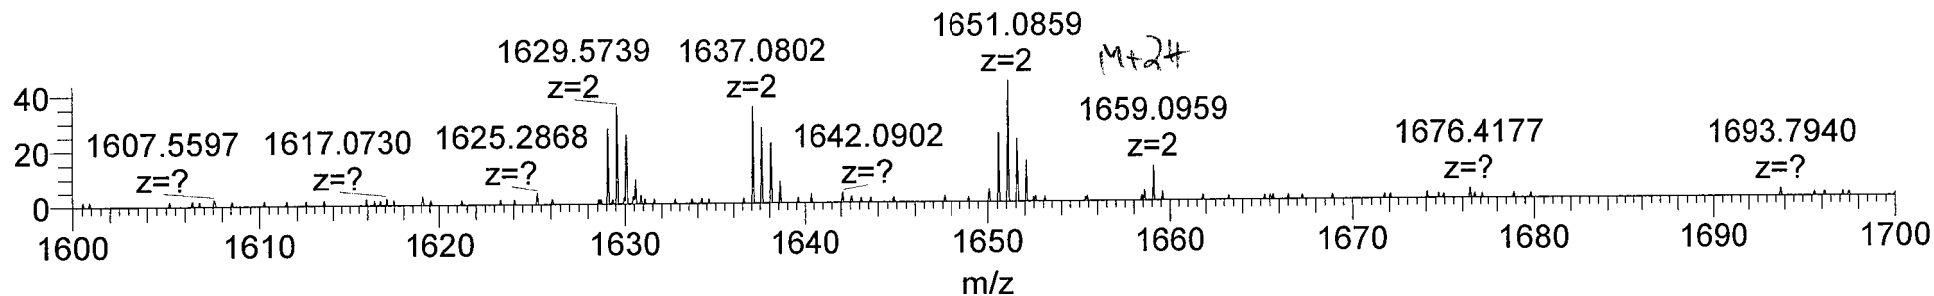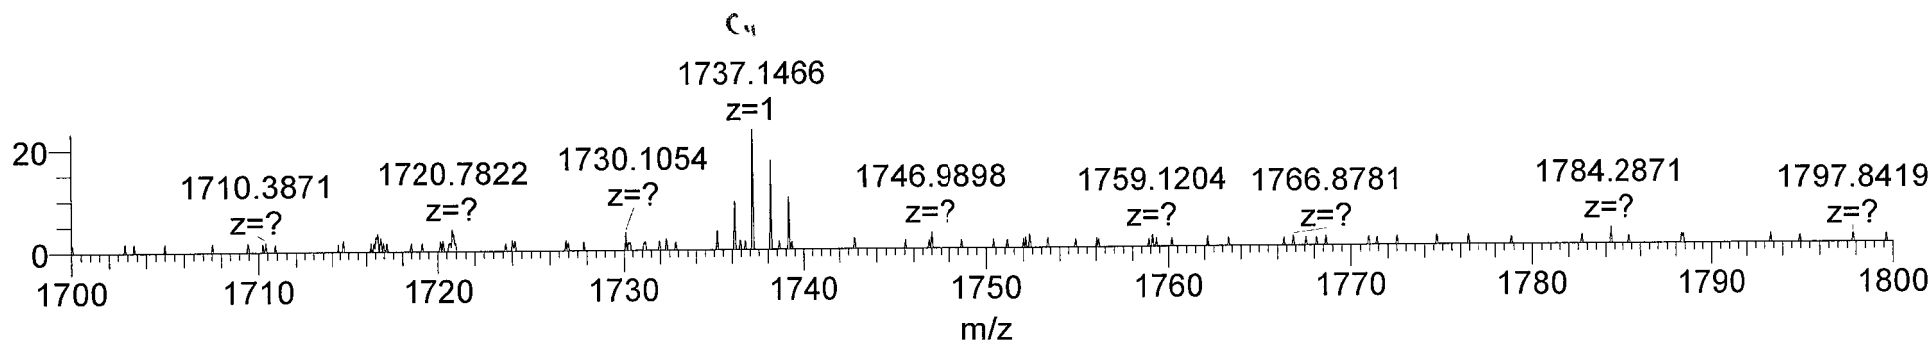



# Fragment Masses

| +5 c ions | +4 c ions  | +3 c ions   | +2 c ions   | +1 c ions   | Sequence       | +1 z ions   | +2 z ions   | +3 z ions   | +4 z ions  | +5 z ions |
|-----------|------------|-------------|-------------|-------------|----------------|-------------|-------------|-------------|------------|-----------|
| 35.6328   | 44.2892    | 58.7165     | 87.5711     | 174.1349 ✓  | R              | 3313.1614   | 1657.0843   | 1105.0587   | 829.0458   | 663.4381  |
| 66.8530   | 83.3145    | 110.7502    | 165.6217    | 330.2360 ✓  | R              | 3141.0416   | 1571.0244 ✓ | 1047.6854 ✓ | 786.0158 ✓ | 629.0141  |
| 98.0733   | 122.3397   | 162.7839    | 243.6722    | 486.3372 ✓  | R              | 2984.9405   | 1492.9739 ✓ | 995.6517 ✓  | 746.9906 ✓ | 597.7939  |
| 129.2935  | 161.3650   | 214.8176    | 321.7228    | 642.4383 ✓  | R              | 2828.8393   | 1414.9233 ✓ | 943.6180 ✓  | 707.9653 ✓ | 566.5737  |
| 160.5137  | 200.3903   | 266.8513    | 399.7733    | 798.5394 ✓  | R              | 2672.7382   | 1336.8728 ✓ | 891.5843 ✓  | 668.9400 ✓ | 535.3535  |
| 191.7339  | 239.4156   | 318.8850    | 477.8239 ✓  | 954.6405 ✓  | R              | 2516.6371   | 1258.8222 ✓ | 839.5506 ✓  | 629.9147 ✓ | 504.1332  |
| 222.9541  | 278.4409   | 370.9187    | 555.8744 ✓  | 1110.7416 ✓ | R              | 2360.5360   | 1180.7716 ✓ | 787.5169 ✓  | 590.8895 ✓ | 472.9130  |
| 254.1744  | 317.4661   | 422.9524    | 633.9250 ✓  | 1266.8427 ✓ | R              | 2204.4349   | 1102.7211 ✓ | 735.4832 ✓  | 551.8642   | 441.6928  |
| 285.3946  | 356.4914   | 474.9861    | 711.9756 ✓  | 1422.9438 ✓ | R              | 2048.3338   | 1024.6705 ✓ | 683.4494 ✓  | 512.8389   | 410.4726  |
| 316.6148  | 395.5167   | 527.0198    | 790.0261 ✓  | 1579.0449 ✓ | R              | 1892.2327   | 946.6200 ✓  | 631.4157 ✓  | 473.8136   | 379.2524  |
| 347.8350  | 434.5420   | 579.0535 ✓  | 868.0767 ✓  | 1735.1460 ✓ | R              | 1736.1316 ✓ | 868.5694 ✓  | 579.3820 ✓  | 434.7884   | 348.0321  |
| 379.0553  | 473.5672   | 631.0872 ✓  | 946.1272 ✓  | 1891.2472   | R              | 1580.0305 ✓ | 790.5189 ✓  | 527.3483 ✓  | 395.7631   | 316.8119  |
| 410.2755  | 512.5925   | 683.1209 ✓  | 1024.1778 ✓ | 2047.3483   | R              | 1423.9293 ✓ | 712.4683 ✓  | 475.3146 ✓  | 356.7378   | 285.5917  |
| 441.4957  | 551.6178   | 735.1546 ✓  | 1102.2283 ✓ | 2203.4494   | R              | 1267.8282 ✓ | 634.4178    | 423.2809    | 317.7125   | 254.3715  |
| 458.9021  | 573.3758   | 764.1653 ✓  | 1145.7443 ✓ | 2290.4814   | S              | 1111.7271 ✓ | 556.3672 ✓  | 371.2472    | 278.6872   | 223.1512  |
| 490.1223  | 612.4011 ✓ | 816.1990 ✓  | 1223.7949 ✓ | 2446.5825   | R              | 1024.6951   | 512.8512 ✓  | 342.2366    | 256.9292   | 205.7448  |
| 521.3425  | 651.4264 ✓ | 868.2327 ✓  | 1301.8455 ✓ | 2602.6836   | R              | 868.5940 ✓  | 434.8006 ✓  | 290.2028    | 217.9040   | 174.5246  |
| 552.5628  | 690.4516 ✓ | 920.2664 ✓  | 1379.8960 ✓ | 2758.7847   | R              | 712.4929 ✓  | 356.7501 ✓  | 238.1691    | 178.8787   | 143.3044  |
| 583.7830  | 729.4769 ✓ | 972.3001 ✓  | 1457.9466 ✓ | 2914.8859   | R              | 556.3918 ✓  | 278.6995    | 186.1354    | 139.8534   | 112.0842  |
| 595.1873  | 743.7323 ✓ | 991.3073 ✓  | 1486.4573 ✓ | 2971.9073   | G              | 400.2907 ✓  | 200.6490    | 134.1017    | 100.8281   | 80.8640   |
| 626.4075  | 782.7576 ✓ | 1043.3410 ✓ | 1564.5079   | 3128.0084   | R              | 343.2692 ✓  | 172.1382    | 115.0946    | 86.5728    | 69.4597   |
| 663.4381  | 829.0458   | 1105.0587   | 1657.0843   | 3313.1614   | K              | 187.1681 ✓  | 94.0877     | 63.0609     | 47.5475    | 38.2394   |
|           |            |             |             |             | (ctern + 56... |             |             |             |            |           |

021519\_Op2perYellowTube\_Gradient\_DD\_Heat15 #2931-7238 RT: 12.04-24.54 AV: 46 NL: 4.36E4  
T: FTMS + p NSI d Full ms2 575.5286@etd2.52 [120.0000-2000.0000]

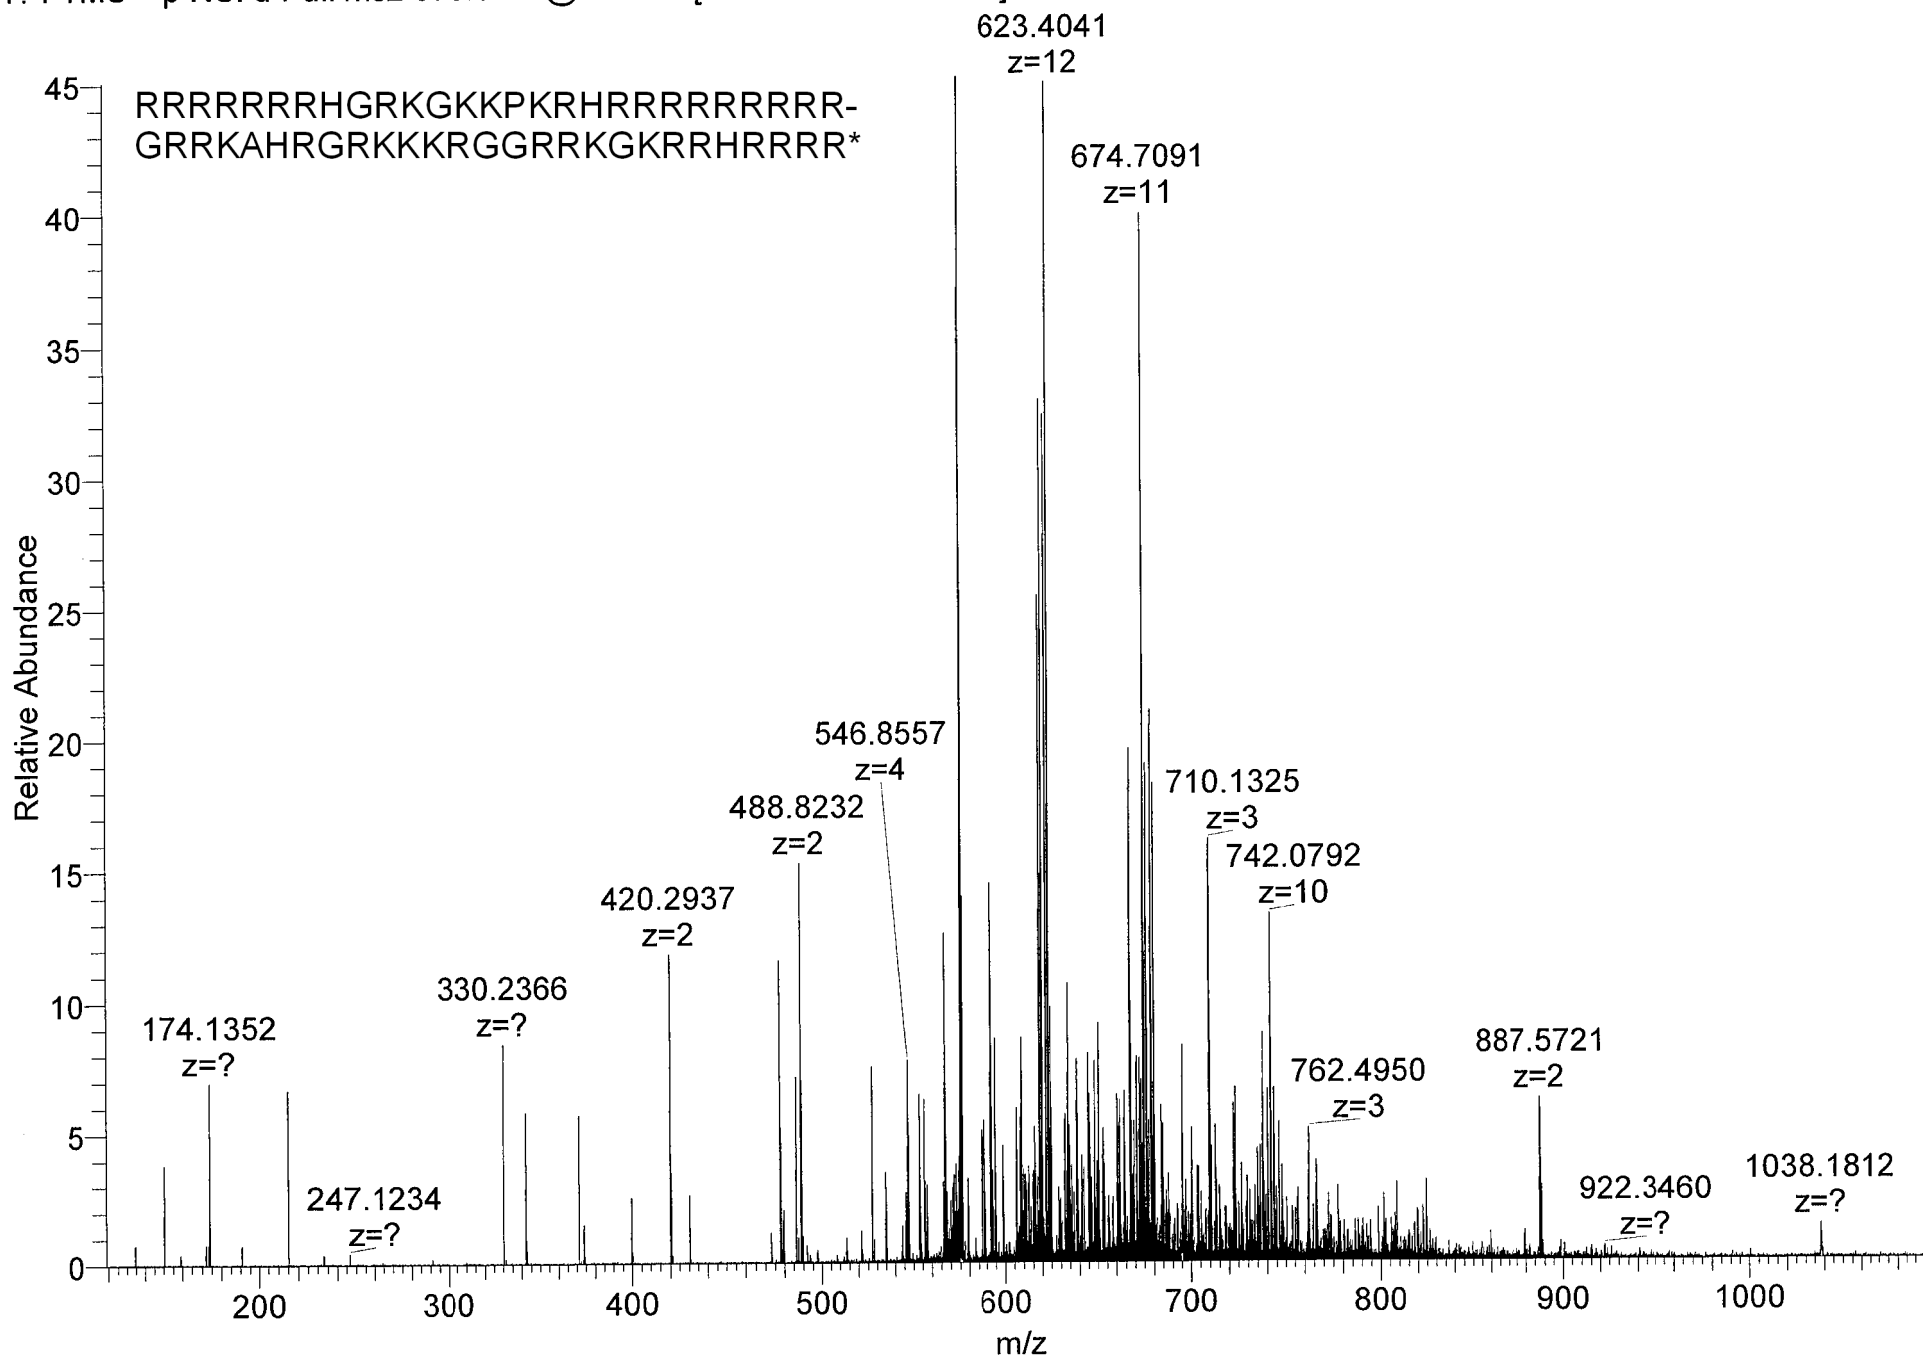

021519\_0p2perYellowTube\_Gradient\_DD\_Heat15 #2930-7239 RT: 12.04-24.54 AV: 46 NL: 6.65E3

T: FTMS + p NSI d Full ms2 575.5286@etd2.52 [120.0000-2000.0000]

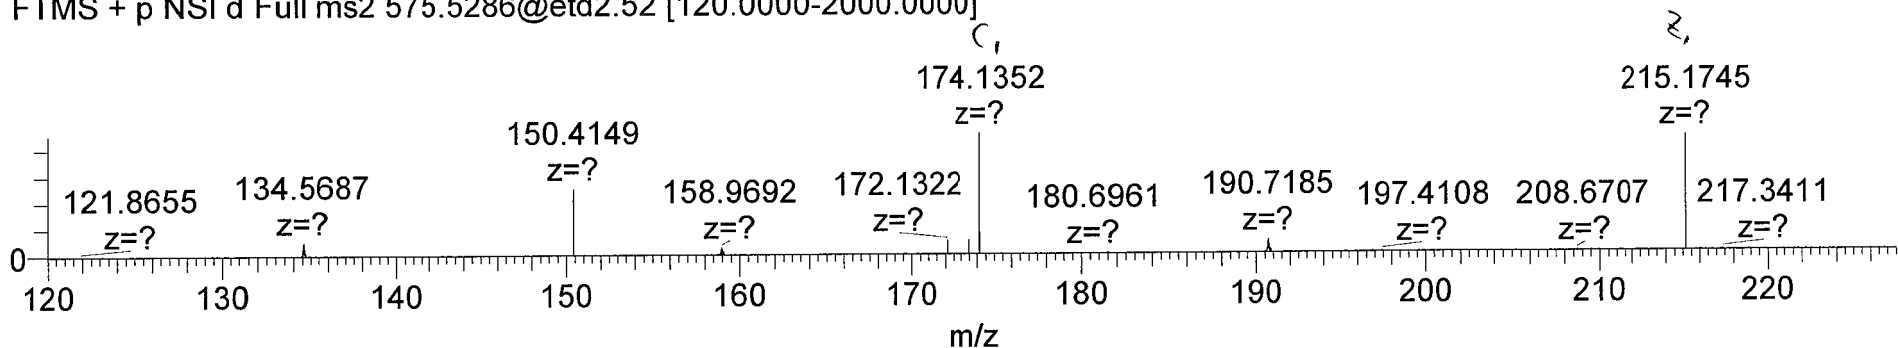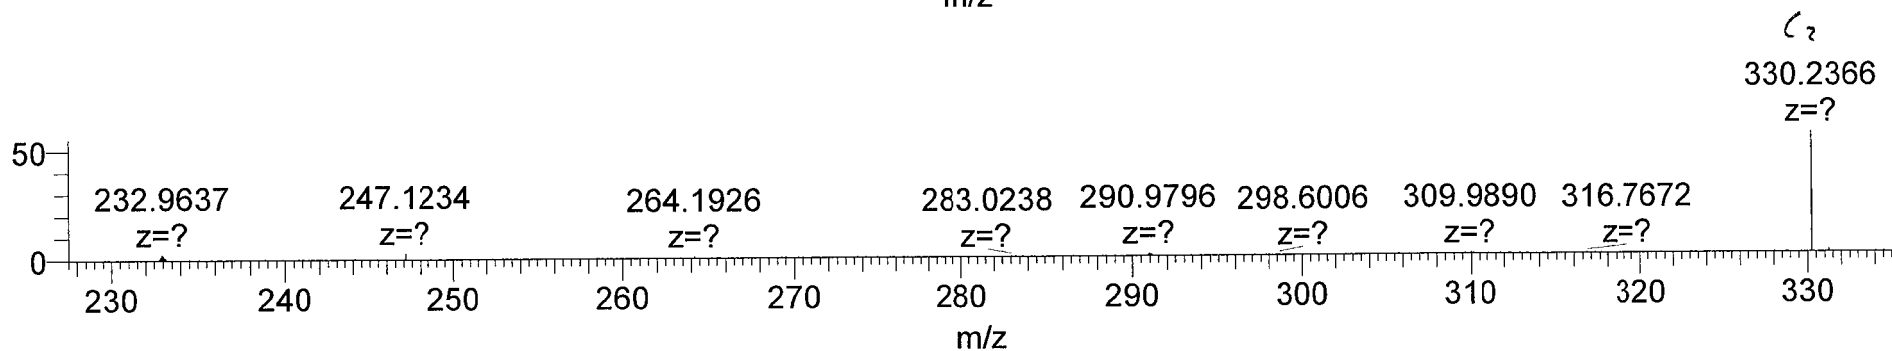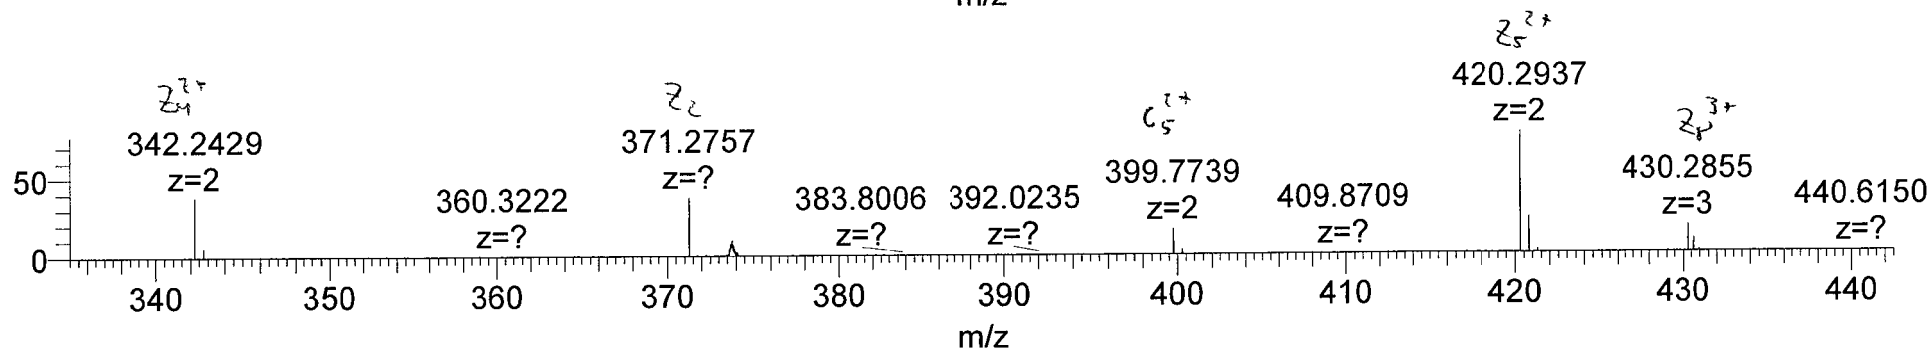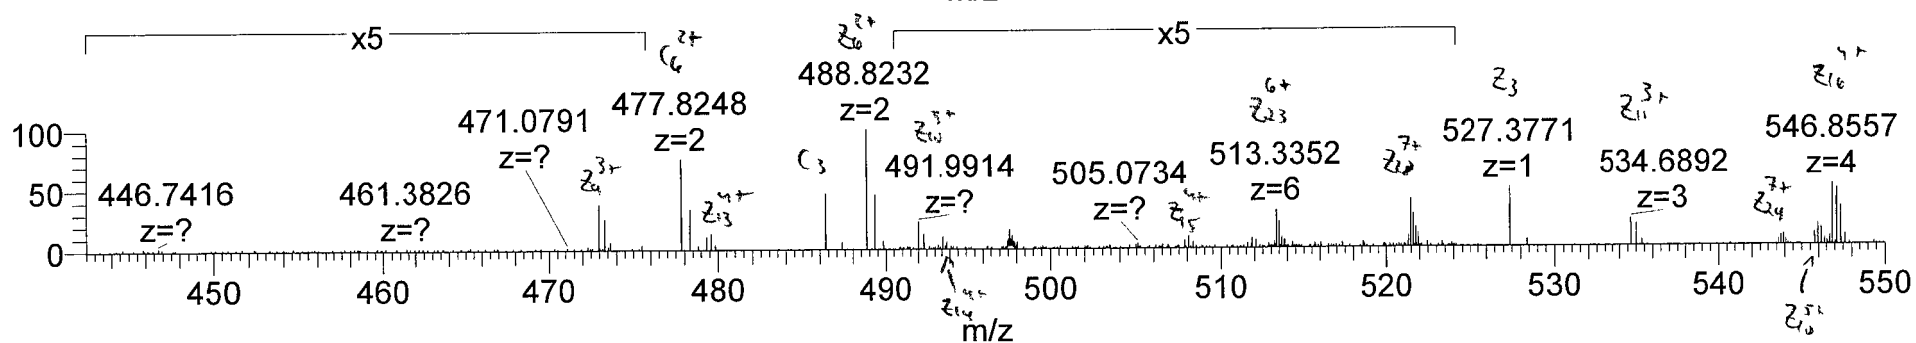

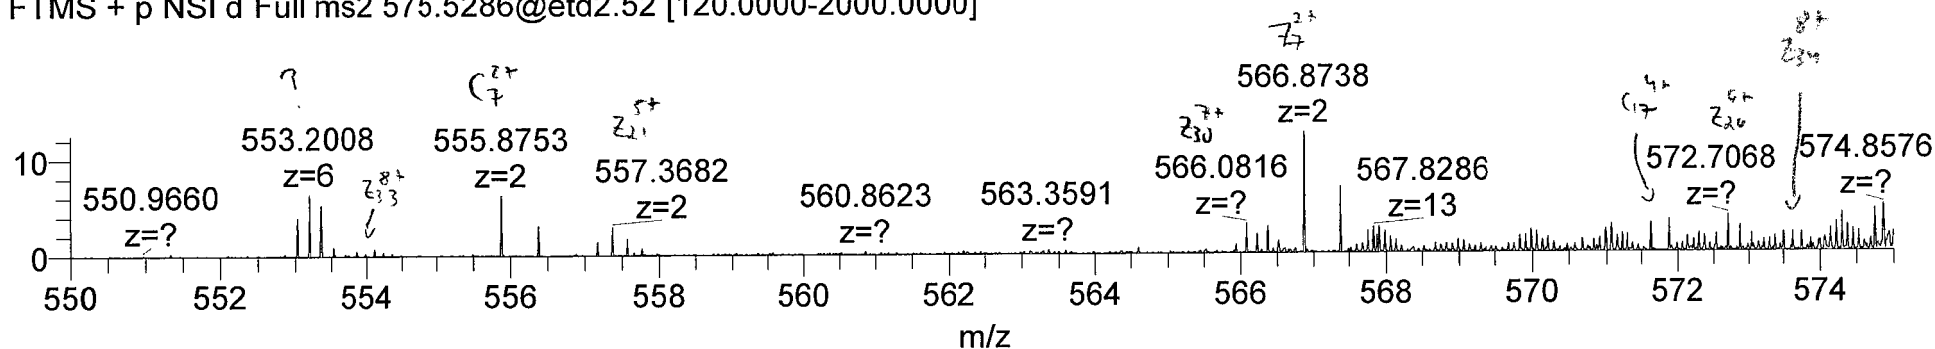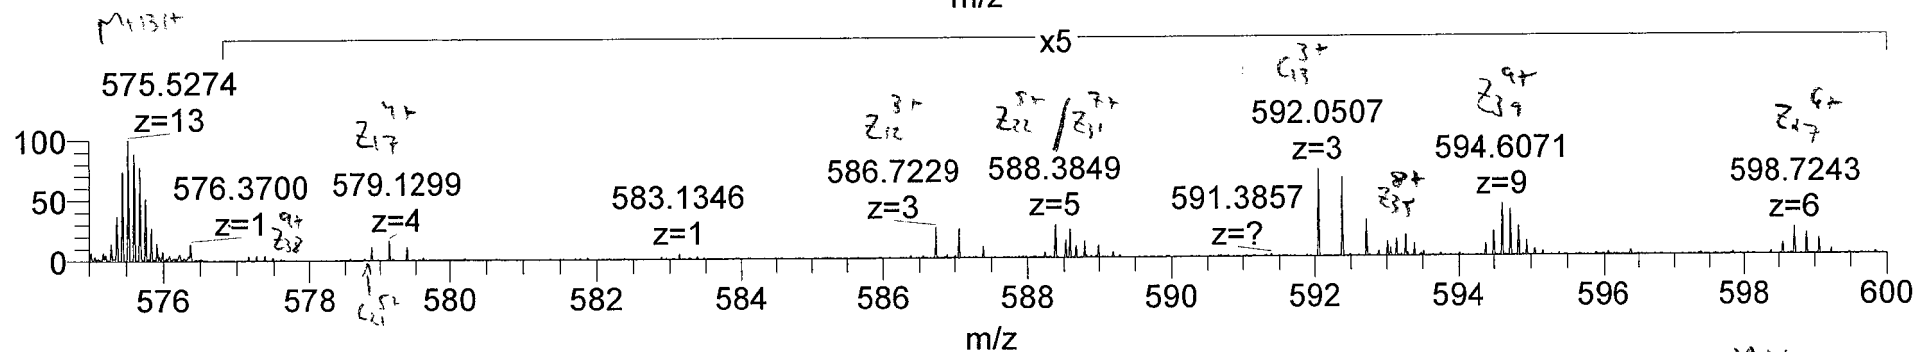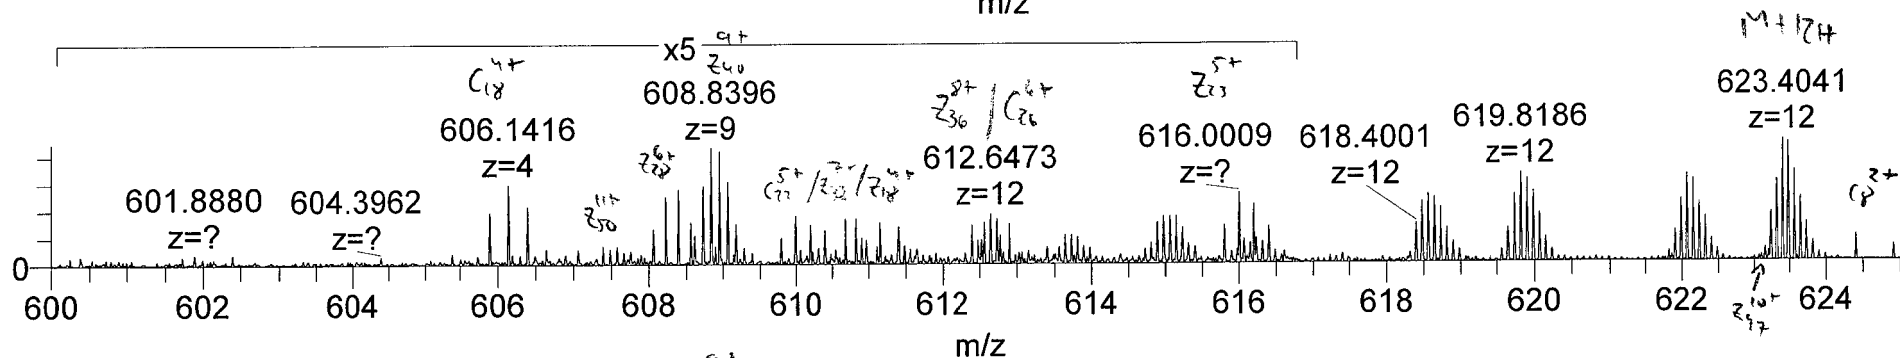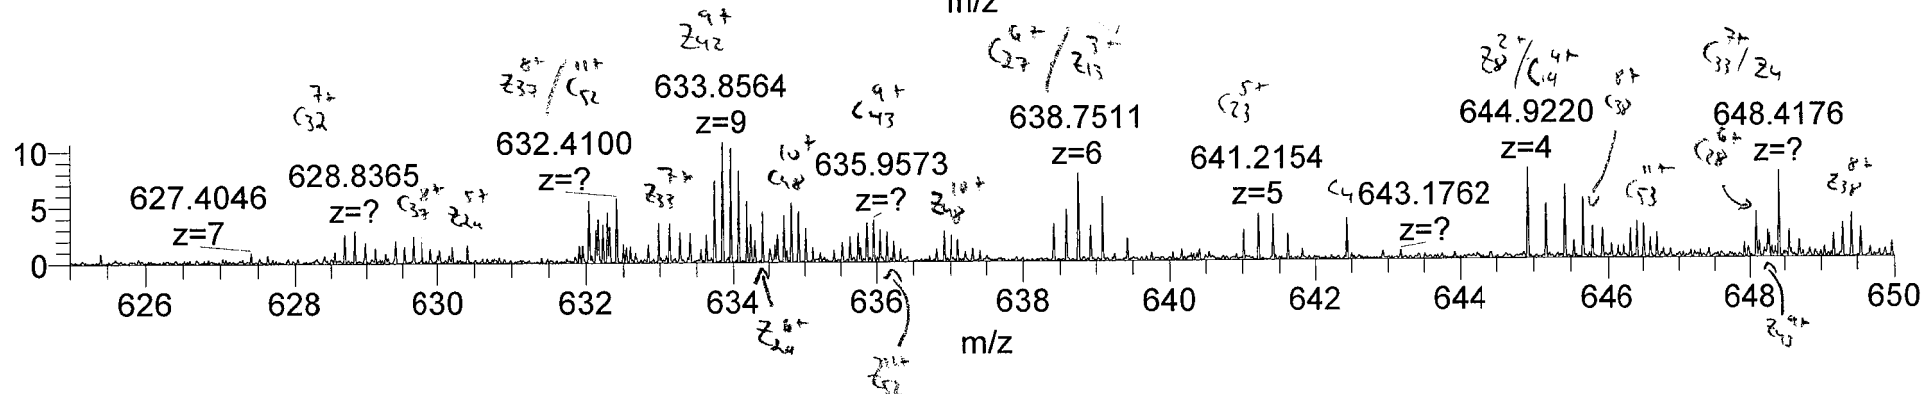

021519\_0p2perYellowTube\_Gradient\_DD\_Heat15 #2930-7239 RT: 12.04-24.54 AV: 46 NL: 1.74E4  
T: FTMS + p NSI d Full ms2 575.5286@etd2.52 [120.0000-2000.0000]

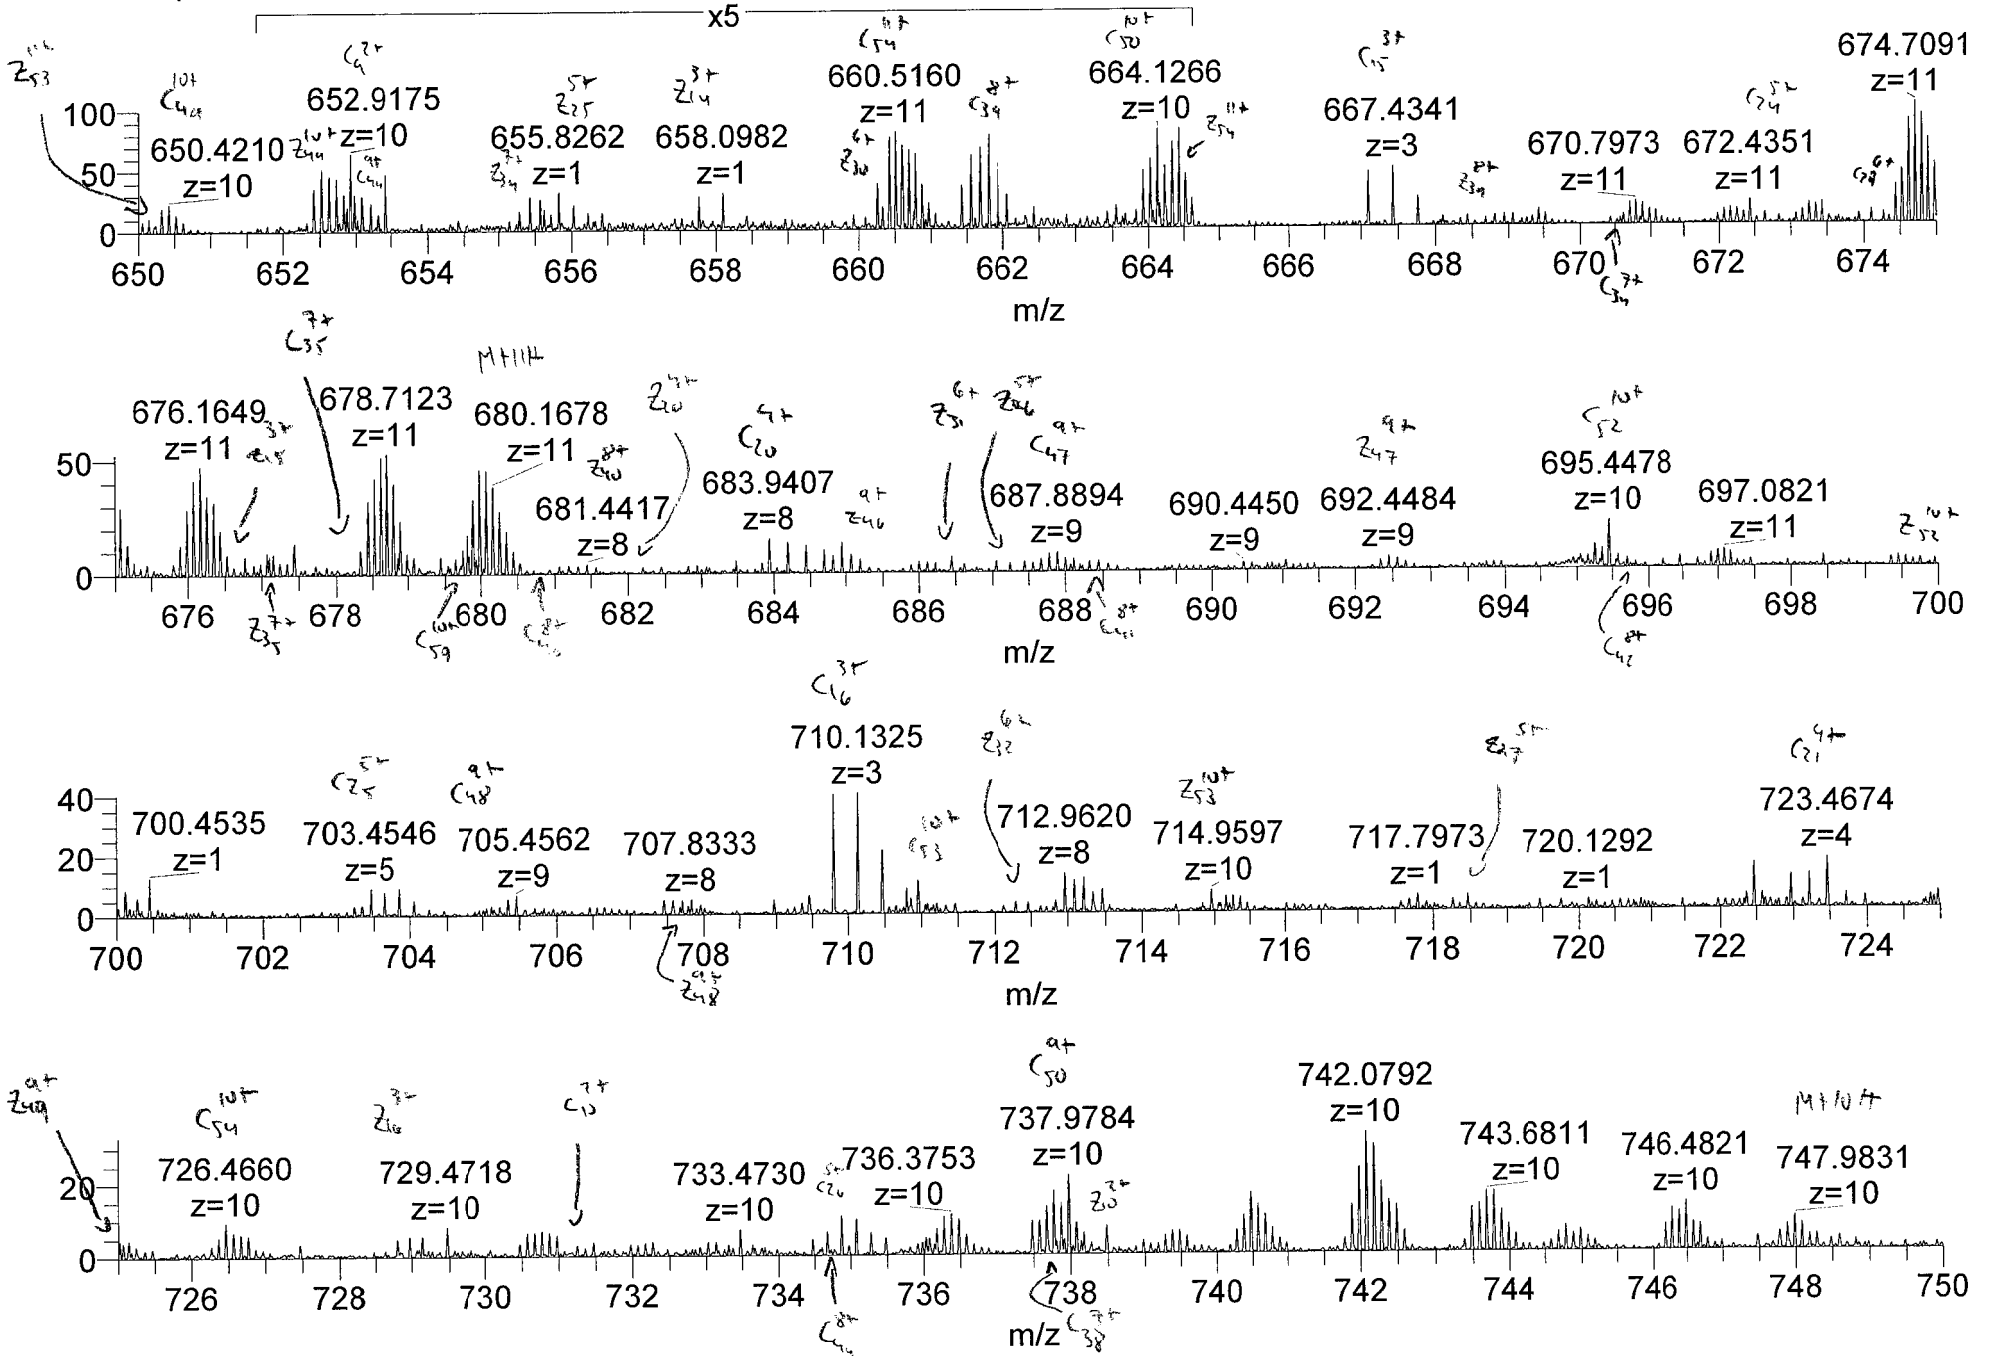

021519\_Op2perYellowTube\_Gradient\_DD\_Heat15 #2930-7239 RT: 12.04-24.54 AV: 46 NL: 2.71E3

T: FTMS + p NSI d Full ms2 575.5286@etd2.52 [120.0000-2000.0000]

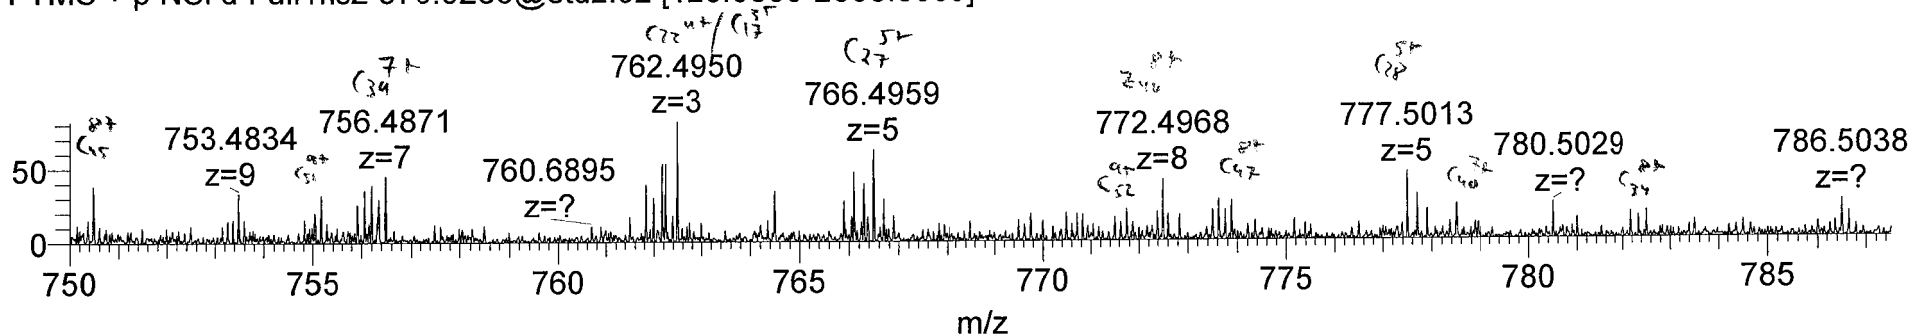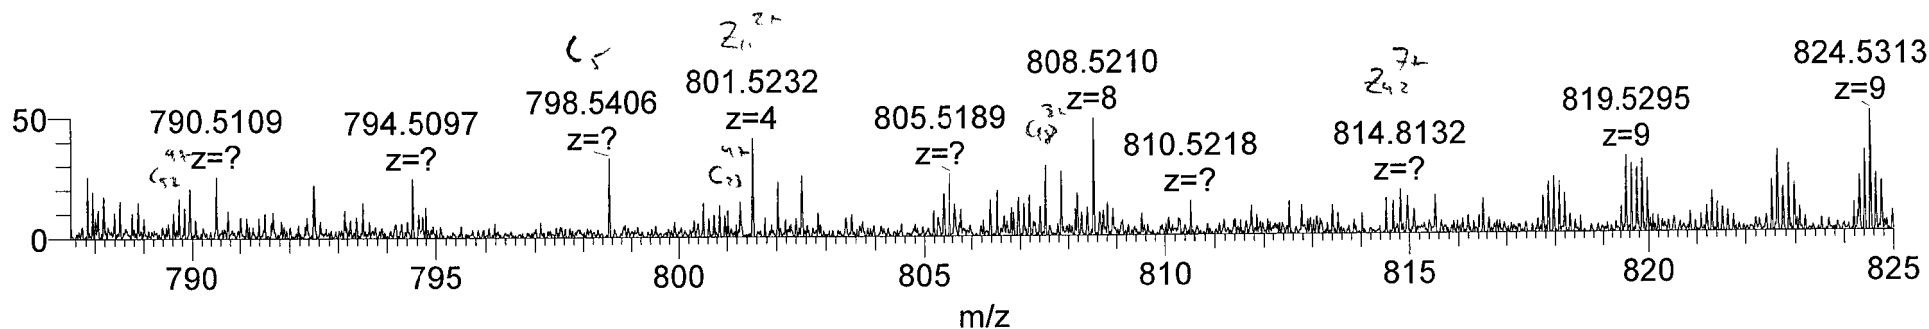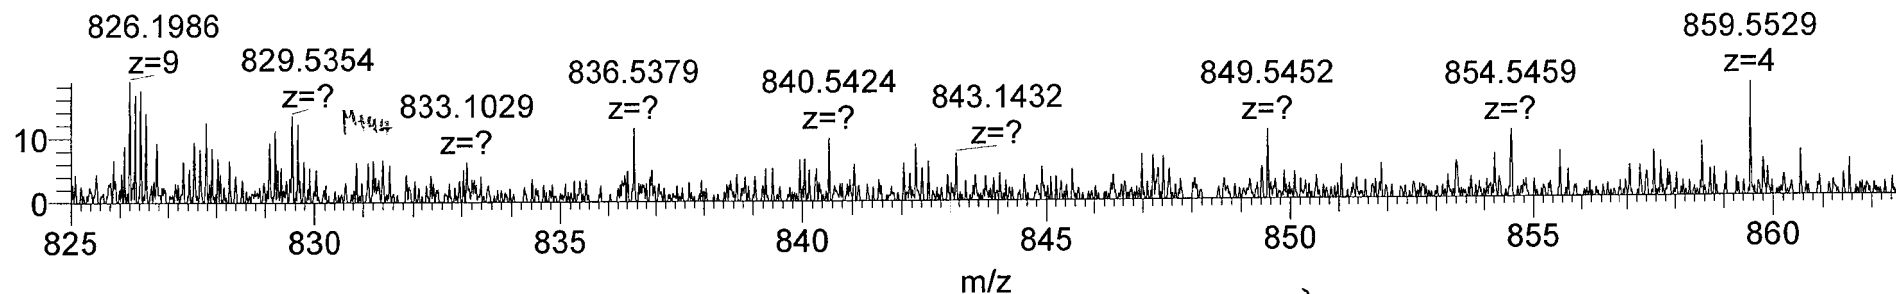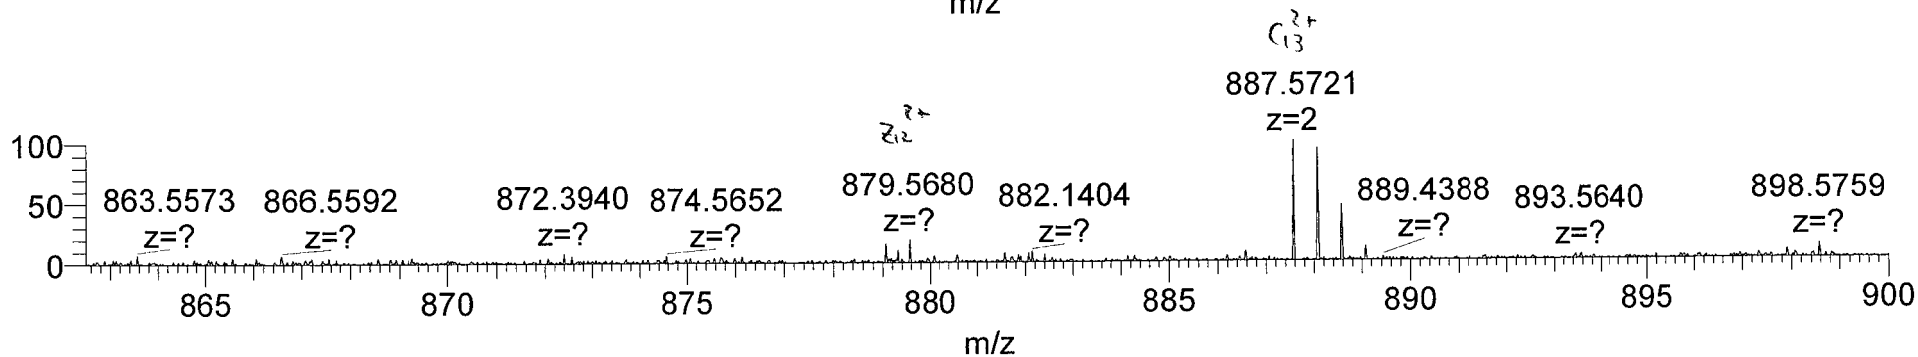

021519\_0p2perYellowTube\_Gradient\_DD\_Heat15 #2930-7239 RT: 12.04-24.54 AV: 46 NL: 2.69E2  
T: FTMS + p NSI d Full ms2 575.5286@etd2.52 [120.0000-2000.0000]

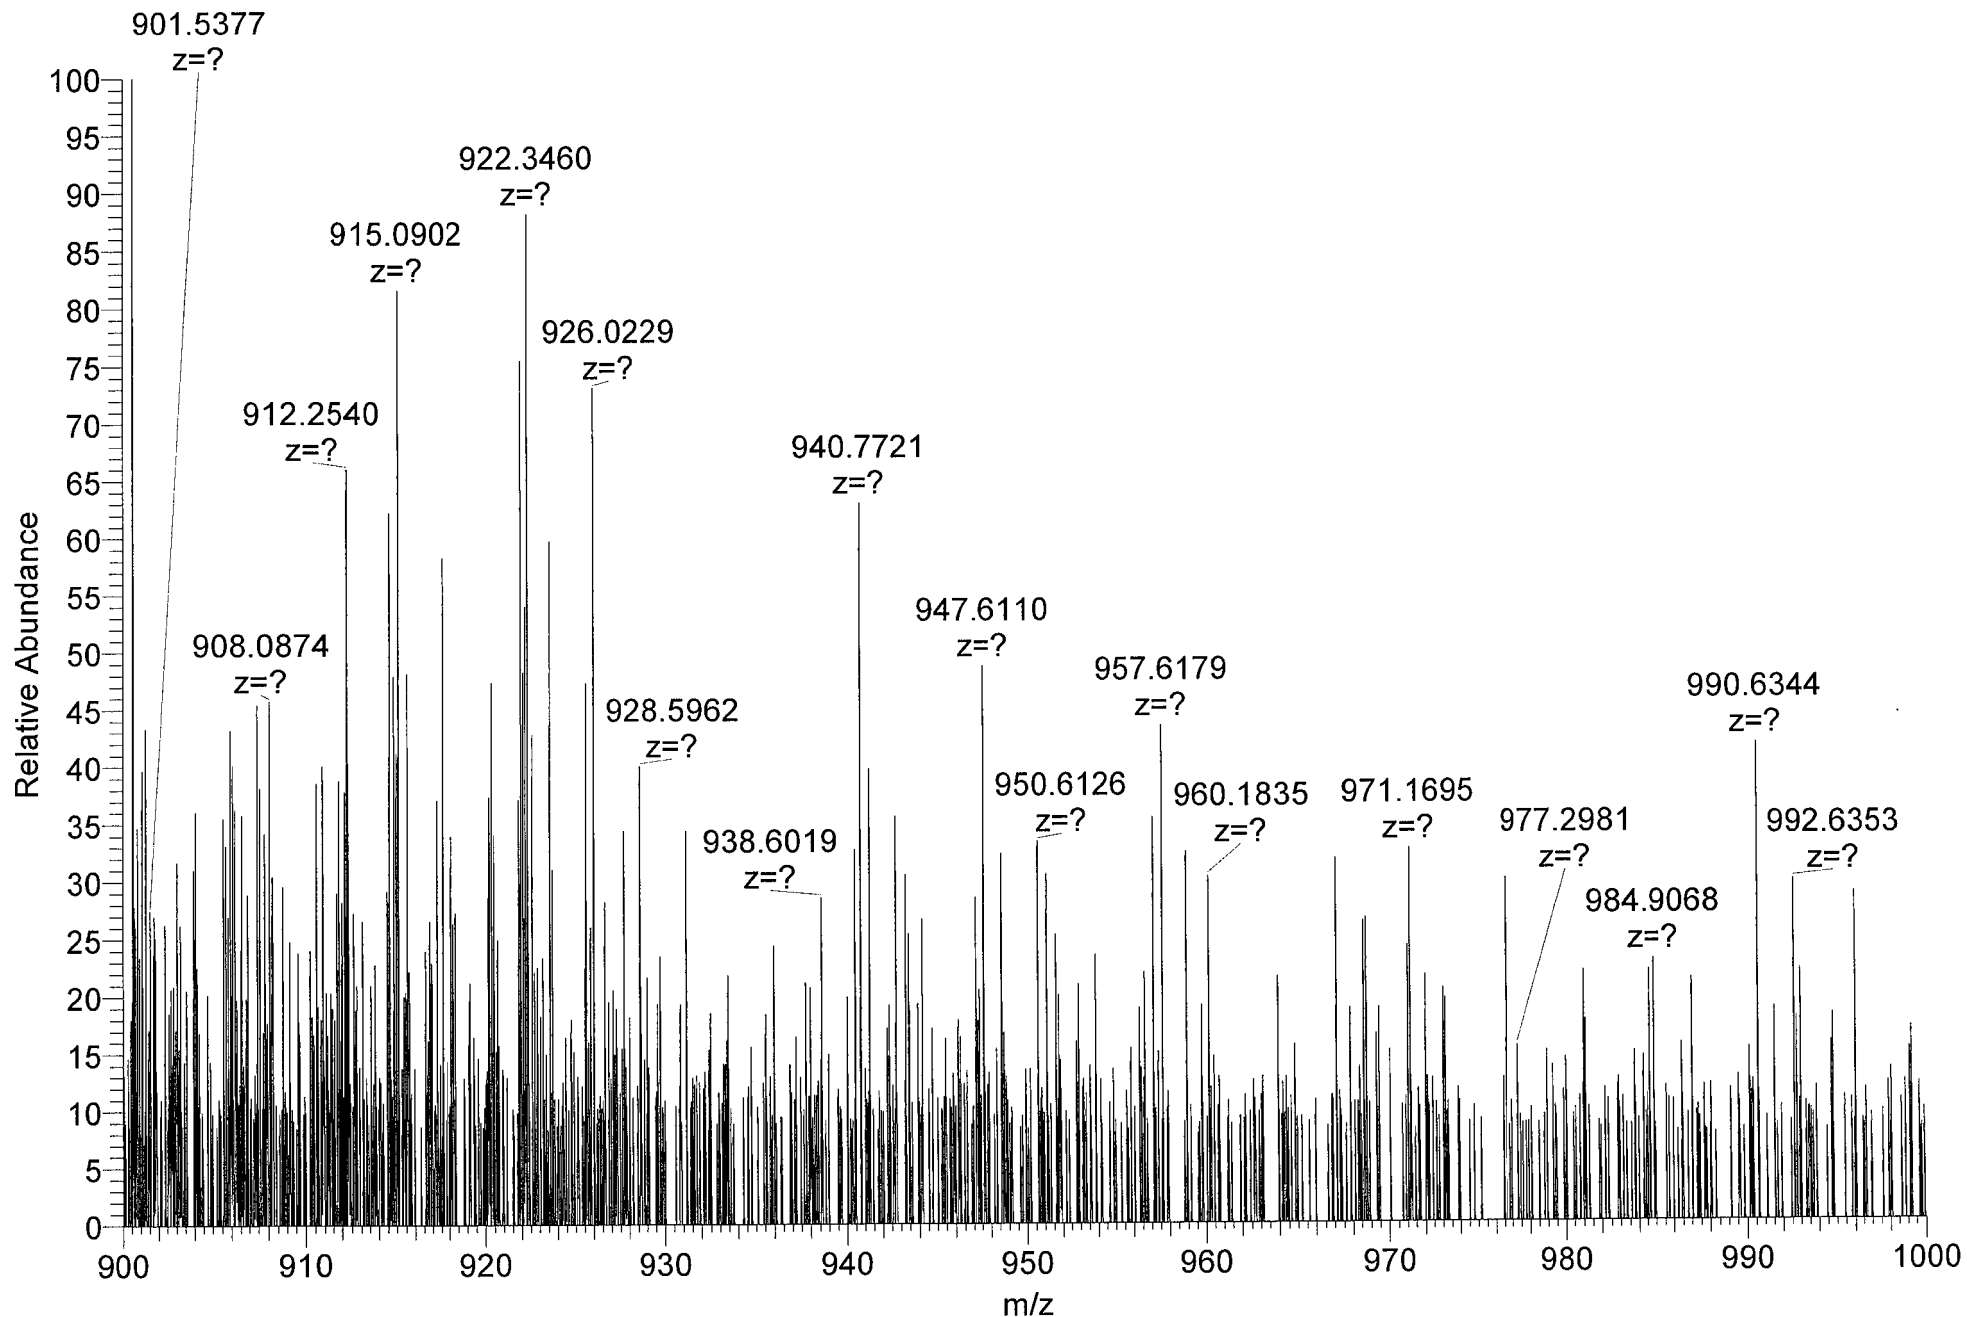

# Fragment Masses

| +11 c ions | +10 c ions | +9 c ions | +8 c ions | +7 c ions | +6 c ions | +5 c ions | +4 c ions | +3 c ions | +2 c ions | +1 c ions | Sequence |
|------------|------------|-----------|-----------|-----------|-----------|-----------|-----------|-----------|-----------|-----------|----------|
| 16.7462    | 18.3200    | 20.2437   | 22.6482   | 25.7398   | 29.8619   | 35.6328   | 44.2892   | 58.7165   | 87.5711   | 174.1349  | R        |
| 30.9372    | 33.9302    | 37.5883   | 42.1609   | 48.0400   | 55.8787   | 66.8530   | 83.3145   | 110.7502  | 165.6217  | 330.2360  | R        |
| 45.1282    | 49.5403    | 54.9328   | 61.6735   | 70.3401   | 81.8956   | 98.0733   | 122.3397  | 162.7839  | 243.6722  | 486.3372  | R        |
| 59.3192    | 65.1504    | 72.2774   | 81.1862   | 92.6403   | 107.9124  | 129.2935  | 161.3650  | 214.8176  | 321.7228  | 642.4383  | R        |
| 73.5102    | 80.7605    | 89.6220   | 100.6988  | 114.9404  | 133.9293  | 160.5137  | 200.3903  | 266.8513  | 399.7733  | 798.5394  | R        |
| 87.7012    | 96.3706    | 106.9665  | 120.2114  | 137.2406  | 159.9461  | 191.7339  | 239.4156  | 318.8850  | 477.8239  | 954.6405  | R        |
| 101.8922   | 111.9807   | 124.3111  | 139.7241  | 159.5408  | 185.9630  | 222.9541  | 278.4409  | 370.9187  | 555.8744  | 1110.7416 | R        |
| 114.3521   | 125.6866   | 139.5399  | 156.8564  | 179.1206  | 208.8061  | 250.3659  | 312.7056  | 416.6050  | 624.4039  | 1247.8005 | H        |
| 119.5359   | 131.3887   | 145.8756  | 163.9841  | 187.2665  | 218.3097  | 261.7702  | 326.9610  | 435.6122  | 652.9146  | 1304.8220 | G        |
| 133.7269   | 146.9989   | 163.2201  | 183.4968  | 209.5667  | 244.3266  | 292.9904  | 365.9862  | 487.6459  | 730.9652  | 1460.9231 | R        |
| 145.3719   | 159.8084   | 177.4529  | 199.5086  | 227.8660  | 265.6757  | 318.6094  | 398.0100  | 530.3442  | 795.0127  | 1589.0181 | K        |
| 150.5557   | 165.5105   | 183.7886  | 206.6363  | 236.0119  | 275.1793  | 330.0137  | 412.2653  | 549.3514  | 823.5234  | 1646.0395 | G        |
| 162.2007   | 178.3200   | 198.0214  | 222.6482  | 254.3112  | 296.5285  | 355.6327  | 444.2891  | 592.0497  | 887.5709  | 1774.1345 | K        |
| 173.8457   | 191.1295   | 212.2542  | 238.6500  | 272.6104  | 317.8776  | 381.2517  | 476.3128  | 634.7480  | 951.6184  | 1902.2294 | K        |
| 182.6686   | 200.8348   | 223.0378  | 250.7916  | 286.4751  | 334.0531  | 400.6623  | 500.5760  | 667.0989  | 1000.1447 | 1999.2822 | P        |
| 194.3136   | 213.6443   | 237.2706  | 266.8035  | 304.7744  | 355.4023  | 426.2813  | 532.5997  | 709.7972  | 1084.1922 | 2127.3772 | K        |
| 208.5046   | 229.2544   | 254.6152  | 286.3162  | 327.0746  | 381.4191  | 457.5015  | 571.6250  | 761.8309  | 1142.2428 | 2283.4783 | R        |
| 220.9645   | 242.9603   | 269.8439  | 303.4485  | 346.6544  | 404.2623  | 484.9133  | 605.8898  | 807.5172  | 1210.7722 | 2420.5372 | H        |
| 235.1556   | 258.5704   | 287.1885  | 322.9612  | 368.9546  | 430.2791  | 516.1335  | 644.9150  | 859.5510  | 1288.8228 | 2576.6383 | R        |
| 249.3466   | 274.1805   | 304.5331  | 342.4738  | 391.2547  | 456.2960  | 547.3537  | 683.9403  | 911.5847  | 1366.8733 | 2732.7394 | R        |
| 263.5376   | 289.7906   | 321.8776  | 361.9864  | 413.5549  | 482.3128  | 578.5739  | 722.9656  | 963.6184  | 1444.9239 | 2888.8405 | R        |
| 277.7286   | 305.4007   | 339.2222  | 381.4991  | 435.8550  | 508.3297  | 609.7941  | 761.9909  | 1015.6521 | 1522.9745 | 3044.9416 | R        |
| 291.9196   | 321.0108   | 356.5668  | 401.0117  | 458.1552  | 534.3465  | 641.0144  | 801.0161  | 1067.6858 | 1601.0250 | 3201.0427 | R        |
| 306.1106   | 336.6209   | 373.9113  | 420.5243  | 480.4554  | 560.3634  | 672.2346  | 840.0414  | 1119.7195 | 1679.0756 | 3357.1439 | R        |
| 320.3016   | 352.2310   | 391.2559  | 440.0370  | 502.7555  | 586.3802  | 703.4548  | 879.0667  | 1171.7532 | 1757.1261 | 3513.2450 | R        |
| 334.4926   | 367.8412   | 408.6005  | 459.5496  | 525.0557  | 612.3971  | 734.6750  | 918.0920  | 1223.7869 | 1835.1767 | 3669.3461 | R        |
| 348.6836   | 383.4513   | 425.9450  | 479.0623  | 547.3558  | 638.4139  | 765.8953  | 957.1173  | 1275.8206 | 1913.2272 | 3825.4472 | R        |
| 353.8674   | 389.1534   | 432.2808  | 486.1899  | 555.5018  | 647.9175  | 777.2996  | 971.3726  | 1294.8277 | 1941.7380 | 3882.4687 | G        |
| 368.0584   | 404.7635   | 449.6253  | 505.7026  | 577.8019  | 673.9344  | 808.5198  | 1010.3979 | 1346.8614 | 2019.7885 | 4038.5698 | R        |
| 382.2494   | 420.3736   | 466.9699  | 525.2152  | 600.1021  | 699.9512  | 839.7400  | 1049.4232 | 1398.8951 | 2097.8391 | 4194.6709 | R        |
| 393.8944   | 433.1831   | 481.2027  | 541.2271  | 618.4014  | 721.3004  | 865.3590  | 1081.4469 | 1441.5935 | 2161.8866 | 4322.7658 | K        |
| 400.3523   | 440.2868   | 489.0957  | 550.1067  | 628.5495  | 733.1399  | 879.5664  | 1099.2062 | 1465.2725 | 2197.4051 | 4393.8030 | A        |
| 412.8122   | 453.9927   | 504.3245  | 567.2391  | 648.1294  | 755.9830  | 906.9782  | 1133.4709 | 1510.9588 | 2265.9346 | 4530.8619 | H        |
| 427.0032   | 469.6028   | 521.6690  | 586.7517  | 670.4295  | 781.9999  | 938.1984  | 1172.4962 | 1562.9925 | 2343.9851 | 4686.9630 | R        |
| 432.1870   | 475.3050   | 528.0047  | 593.8794  | 678.5754  | 791.5035  | 949.6027  | 1186.7516 | 1581.9997 | 2372.4959 | 4743.9844 | G        |
| 446.3780   | 490.9151   | 545.3493  | 613.3921  | 700.8756  | 817.5203  | 980.8229  | 1225.7768 | 1634.0334 | 2450.5464 | 4900.0856 | R        |
| 458.0230   | 503.7246   | 559.5821  | 629.4039  | 719.1749  | 838.8695  | 1006.4419 | 1257.8006 | 1676.7317 | 2514.5939 | 5028.1805 | K        |
| 469.6680   | 516.5341   | 573.8149  | 645.4158  | 737.4742  | 860.2186  | 1032.0609 | 1289.8243 | 1719.4300 | 2578.6414 | 5156.2755 | K        |
| 481.3130   | 529.3436   | 588.0476  | 661.4277  | 755.7734  | 881.5678  | 1057.6799 | 1321.8481 | 1762.1283 | 2642.6889 | 5284.3704 | K        |
| 495.5040   | 544.9537   | 605.3922  | 680.9403  | 778.0736  | 907.5847  | 1088.9001 | 1360.8733 | 1814.1620 | 2720.7394 | 5440.4716 | R        |
| 500.6878   | 550.6559   | 611.7279  | 688.0680  | 786.2195  | 917.0882  | 1100.3044 | 1375.1287 | 1833.1692 | 2749.2501 | 5497.4930 | G        |
| 505.8716   | 556.3580   | 618.0636  | 695.1957  | 794.3654  | 926.5918  | 1111.7087 | 1389.3841 | 1852.1763 | 2777.7609 | 5554.5145 | G        |
| 520.0626   | 571.9681   | 635.4082  | 714.7083  | 816.6656  | 952.6087  | 1142.9289 | 1428.4094 | 1904.2100 | 2855.8114 | 5710.6156 | R        |
| 534.2536   | 587.5782   | 652.7528  | 734.2210  | 838.9658  | 978.6255  | 1174.1492 | 1467.4346 | 1956.2438 | 2933.8620 | 5866.7167 | R        |
| 545.8986   | 600.3877   | 666.9855  | 750.2328  | 857.2650  | 999.9747  | 1199.7682 | 1499.4584 | 1998.9421 | 2997.9095 | 5994.8117 | K        |
| 551.0824   | 606.0899   | 673.3213  | 757.3605  | 865.4110  | 1009.4783 | 1211.1724 | 1513.7137 | 2017.9492 | 3026.4202 | 6051.8331 | G        |
| 562.7274   | 618.8994   | 687.5540  | 773.3724  | 883.7102  | 1030.8274 | 1236.7914 | 1545.7375 | 2060.6475 | 3090.4677 | 6179.9281 | K        |
| 578.9184   | 634.5095   | 704.8986  | 792.8850  | 906.0104  | 1056.8443 | 1268.0117 | 1584.7628 | 2112.6813 | 3168.5182 | 6336.0292 | R        |
| 591.1094   | 650.1196   | 722.2432  | 812.3977  | 928.3106  | 1082.8611 | 1299.2319 | 1623.7880 | 2164.7150 | 3246.5688 | 6492.1303 | R        |
| 603.5693   | 663.8255   | 737.4719  | 829.5300  | 947.8904  | 1105.7043 | 1326.6437 | 1658.0528 | 2210.4013 | 3315.0983 | 6629.1892 | H        |
| 617.7603   | 679.4356   | 754.8165  | 849.0427  | 970.1906  | 1131.7211 | 1357.8639 | 1697.0780 | 2262.4350 | 3393.1488 | 6785.2903 | R        |
| 631.9513   | 695.0457   | 772.1611  | 868.5553  | 992.4907  | 1157.7380 | 1389.0841 | 1736.1033 | 2314.4687 | 3471.1994 | 6941.3914 | R        |
| 646.1423   | 710.6558   | 789.5056  | 888.0679  | 1014.7909 | 1183.7548 | 1420.3043 | 1775.1286 | 2366.5024 | 3549.2499 | 7097.4925 | R        |
| 660.3333   | 726.2659   | 806.8502  | 907.5806  | 1037.0910 | 1209.7717 | 1451.5246 | 1814.1539 | 2418.5361 | 3627.3005 | 7253.5937 | R        |
| 679.7114   | 747.5818   | 830.5346  | 934.2255  | 1067.5424 | 1245.2982 | 1494.1564 | 1867.4437 | 2489.5891 | 3733.8800 | 7466.7528 | R        |

(cterm + 56...



# Fragment Masses

| Sequence |    | +1 z ions | +2 z ions | +3 z ions | +4 z ions | +5 z ions | +6 z ions | +7 z ions | +8 z ions | +9 z ions | +10 z ions | +11 z ions |
|----------|----|-----------|-----------|-----------|-----------|-----------|-----------|-----------|-----------|-----------|------------|------------|
| R        | 55 | 7466.7528 | 3733.8800 | 2489.5891 | 1867.4437 | 1494.1564 | 1245.2982 | 1067.5424 | 934.2255  | 830.5346  | 747.5818   | 679.7114   |
| R        | 54 | 7294.6330 | 3647.8201 | 2432.2158 | 1824.4137 | 1459.7324 | 1216.6116 | 1042.9538 | 912.7105  | 811.4101  | 730.3698   | 664.0642   |
| R        | 53 | 7138.5319 | 3569.7696 | 2380.1821 | 1785.3884 | 1428.5122 | 1190.5947 | 1020.6536 | 893.1978  | 794.0656  | 714.7697   | 649.8731   |
| R        | 52 | 6982.4307 | 3491.7190 | 2328.1484 | 1746.3631 | 1397.2920 | 1164.5779 | 998.3535  | 873.6852  | 776.7210  | 699.1496   | 635.6821   |
| R        | 51 | 6826.3296 | 3413.6685 | 2276.1147 | 1707.3379 | 1366.0717 | 1138.5610 | 976.0533  | 854.1726  | 759.3764  | 683.5395   | 621.4911   |
| R        | 50 | 6670.2285 | 3335.6179 | 2224.0810 | 1668.3126 | 1334.8515 | 1112.5441 | 953.7532  | 834.6599  | 742.0319  | 667.9294   | 607.3001   |
| R        | 49 | 6514.1274 | 3257.5673 | 2172.0473 | 1629.2873 | 1303.6313 | 1086.5273 | 931.4530  | 815.1473  | 724.6873  | 652.3193   | 593.1091   |
| H        | 48 | 6358.0263 | 3179.5168 | 2120.0136 | 1590.2620 | 1272.4111 | 1060.5104 | 909.1529  | 795.6347  | 707.3427  | 636.7092   | 578.9181   |
| G        | 47 | 6220.9674 | 3110.9873 | 2074.3273 | 1555.9973 | 1244.9993 | 1037.6673 | 889.5730  | 778.5023  | 692.1140  | 623.0033   | 566.4582   |
| R        | 46 | 6163.9459 | 3082.4766 | 2055.3202 | 1541.7419 | 1233.5950 | 1028.1637 | 881.4271  | 771.3746  | 685.7782  | 617.3011   | 561.2744   |
| K        | 45 | 6007.8448 | 3004.4260 | 2003.2865 | 1502.7167 | 1202.3748 | 1002.1469 | 859.1269  | 751.8620  | 666.4337  | 601.6910   | 547.0834   |
| G        | 44 | 5879.7498 | 2940.3786 | 1960.5881 | 1470.6929 | 1176.7558 | 980.7977  | 840.8276  | 735.8501  | 654.2009  | 588.8815   | 535.4384   |
| K        | 43 | 5822.7284 | 2911.8678 | 1941.5810 | 1456.4376 | 1165.3515 | 971.2941  | 832.6817  | 728.7224  | 647.8652  | 583.1794   | 530.2546   |
| K        | 42 | 5684.6334 | 2847.8203 | 1898.8827 | 1424.4138 | 1139.7325 | 949.9450  | 814.3824  | 712.7105  | 633.6324  | 570.3699   | 518.6097   |
| P        | 41 | 5566.5385 | 2783.7729 | 1856.1843 | 1392.3904 | 1114.1135 | 928.5958  | 796.0832  | 696.6987  | 619.3996  | 557.5604   | 506.9647   |
| K        | 40 | 5469.4857 | 2735.2465 | 1823.8334 | 1368.1269 | 1094.7030 | 912.4203  | 782.2185  | 684.5671  | 608.6160  | 547.8551   | 498.1417   |
| R        | 39 | 5341.3907 | 2671.1990 | 1781.1351 | 1336.1031 | 1069.0840 | 891.0712  | 763.9192  | 668.5552  | 594.3832  | 535.0456   | 486.4967   |
| H        | 38 | 5185.2896 | 2593.1484 | 1729.1014 | 1297.0779 | 1037.8637 | 865.0543  | 741.6190  | 649.0426  | 577.0386  | 519.4355   | 472.3057   |
| R        | 37 | 5048.2307 | 2524.6190 | 1683.4151 | 1262.8131 | 1010.4520 | 842.2112  | 722.0392  | 631.9102  | 561.8099  | 505.7296   | 459.8458   |
| R        | 36 | 4892.1296 | 2446.5684 | 1631.3814 | 1223.7879 | 979.2317  | 816.1943  | 699.7390  | 612.3976  | 544.4653  | 490.1195   | 445.6548   |
| R        | 35 | 4736.0286 | 2368.5179 | 1579.3477 | 1184.7626 | 948.0115  | 790.1775  | 677.4389  | 592.8849  | 527.1207  | 474.5094   | 431.4637   |
| R        | 34 | 4579.9274 | 2290.4673 | 1527.3140 | 1145.7373 | 916.7913  | 764.1606  | 655.1387  | 573.3723  | 509.7762  | 458.8993   | 417.2727   |
| R        | 33 | 4423.8263 | 2212.4168 | 1475.2803 | 1106.7120 | 885.5711  | 738.1438  | 632.8386  | 553.8596  | 492.4316  | 443.2892   | 403.0817   |
| R        | 32 | 4267.7252 | 2134.3662 | 1423.2466 | 1067.6867 | 854.3509  | 712.1269  | 610.5384  | 534.3470  | 475.0870  | 427.6791   | 388.8907   |
| R        | 31 | 4111.6240 | 2056.3157 | 1371.2129 | 1028.6615 | 823.1306  | 686.1101  | 588.2382  | 514.8344  | 457.7425  | 412.0690   | 374.6997   |
| R        | 30 | 3955.5229 | 1978.2651 | 1319.1792 | 989.6362  | 791.9104  | 660.0932  | 565.9381  | 495.3217  | 440.3979  | 396.4588   | 360.5087   |
| R        | 29 | 3799.4218 | 1900.2145 | 1267.1455 | 950.6109  | 760.6902  | 634.0764  | 543.6379  | 475.8091  | 423.0533  | 380.8487   | 346.3177   |
| G        | 28 | 3643.3207 | 1822.1640 | 1215.1118 | 911.5856  | 729.4700  | 608.0595  | 521.3378  | 456.2965  | 405.7088  | 365.2386   | 332.1267   |
| R        | 27 | 3586.2992 | 1793.6533 | 1196.1046 | 897.3303  | 718.0657  | 598.5559  | 513.1918  | 449.1688  | 399.3731  | 359.5365   | 326.9429   |
| R        | 26 | 3430.1981 | 1715.6027 | 1144.0709 | 858.3050  | 686.8454  | 572.5391  | 490.8917  | 429.6561  | 382.0285  | 343.9264   | 312.7519   |
| K        | 25 | 3274.0970 | 1637.5521 | 1092.0372 | 819.2797  | 655.6252  | 546.5222  | 468.5915  | 410.1435  | 364.6839  | 328.3163   | 298.5609   |
| A        | 24 | 3146.0021 | 1573.5047 | 1049.3389 | 787.2560  | 630.0062  | 525.1731  | 450.2922  | 394.1316  | 350.4511  | 315.5068   | 286.9159   |
| H        | 23 | 3074.9649 | 1537.9861 | 1025.6598 | 769.4967  | 615.7988  | 513.3336  | 440.1441  | 385.2520  | 342.5581  | 308.4030   | 280.4580   |
| R        | 22 | 2937.9060 | 1469.4567 | 979.9735  | 735.2320  | 588.3870  | 490.4904  | 420.5642  | 368.1196  | 327.3294  | 294.6972   | 267.9981   |
| G        | 21 | 2781.8049 | 1391.4061 | 927.9398  | 696.2067  | 557.1668  | 464.4736  | 398.2641  | 348.6070  | 309.9848  | 279.0870   | 253.8071   |
| R        | 20 | 2724.7835 | 1362.8954 | 908.9327  | 681.9513  | 545.7625  | 454.9700  | 390.1182  | 341.4793  | 303.6491  | 273.3849   | 248.6233   |
| K        | 19 | 2568.6823 | 1284.8448 | 856.8990  | 642.9260  | 514.5423  | 428.9531  | 367.8180  | 321.9667  | 286.3045  | 257.7748   | 234.4323   |
| K        | 18 | 2440.5874 | 1220.7973 | 814.2006  | 610.9023  | 488.9233  | 407.6040  | 349.5187  | 305.9548  | 272.0717  | 244.9653   | 222.7873   |
| K        | 17 | 2312.4924 | 1156.7498 | 771.5023  | 578.8786  | 463.3043  | 386.2548  | 331.2194  | 289.9429  | 257.8390  | 232.1558   | 211.1423   |
| R        | 16 | 2184.3975 | 1092.7024 | 728.8040  | 546.8548  | 437.6853  | 364.9056  | 312.9202  | 273.9310  | 243.6062  | 219.3463   | 199.4973   |
| G        | 15 | 2028.2963 | 1014.6518 | 676.7703  | 507.8295  | 406.4651  | 338.8888  | 290.6200  | 254.4184  | 226.2616  | 203.7362   | 185.3063   |
| G        | 14 | 1971.2749 | 986.1411  | 657.7631  | 493.5742  | 395.0608  | 329.3852  | 282.4741  | 247.2907  | 219.9259  | 198.0340   | 180.1225   |
| R        | 13 | 1914.2534 | 957.6303  | 638.7560  | 479.3188  | 383.6565  | 319.8816  | 274.3282  | 240.1630  | 213.5902  | 192.3319   | 174.9387   |
| R        | 12 | 1758.1523 | 879.5798  | 586.7223  | 440.2935  | 352.4363  | 293.8648  | 252.0280  | 220.6504  | 196.2456  | 176.7218   | 160.7477   |
| K        | 11 | 1602.0512 | 801.5292  | 534.6886  | 401.2683  | 321.2161  | 267.8479  | 229.7278  | 201.1378  | 178.9010  | 161.1117   | 146.5567   |
| G        | 10 | 1473.9562 | 737.4818  | 491.9903  | 369.2445  | 295.5971  | 246.4988  | 211.4286  | 185.1259  | 164.6683  | 148.3022   | 134.9117   |
| K        | 9  | 1416.9348 | 708.9710  | 472.9831  | 354.9891  | 284.1928  | 236.9952  | 203.2826  | 177.9982  | 158.3326  | 142.6000   | 129.7280   |
| R        | 8  | 1288.8398 | 644.9235  | 430.2848  | 322.9654  | 258.5738  | 215.6460  | 184.9834  | 161.9863  | 144.0998  | 129.7905   | 118.0830   |
| R        | 7  | 1132.7387 | 566.8730  | 378.2511  | 283.9401  | 227.3536  | 189.6292  | 162.6832  | 142.4737  | 126.7552  | 114.1804   | 103.8920   |
| H        | 6  | 976.6376  | 488.8224  | 326.2174  | 244.9149  | 196.1333  | 163.6123  | 140.3830  | 122.9611  | 109.4106  | 98.5703    | 89.7009    |
| R        | 5  | 839.5787  | 420.2930  | 280.5311  | 210.6501  | 168.7216  | 140.7692  | 120.8032  | 105.8287  | 94.1819   | 84.8644    | 77.2410    |
| R        | 4  | 683.4776  | 342.2424  | 228.4974  | 171.6248  | 137.5013  | 114.7523  | 98.5030   | 86.3161   | 76.8373   | 69.2543    | 63.0500    |
| R        | 3  | 527.3764  | 264.1919  | 176.4637  | 132.5996  | 106.2811  | 88.7355   | 76.2029   | 66.8034   | 59.4927   | 53.6442    | 48.8590    |
| R        | 2  | 371.2753  | 186.1413  | 124.4300  | 93.5743   | 75.0609   | 62.7186   | 53.9027   | 47.2908   | 42.1482   | 38.0341    | 34.6680    |
| R        | 1  | 215.1742  | 108.0908  | 72.3963   | 54.5490   | 43.8407   | 36.7018   | 31.6026   | 27.7781   | 24.8036   | 22.4240    | 20.4770    |

(term + 56...)

021519\_0p2perYellowTube\_Gradient\_DD\_Heat15 #2623-3827 RT: 11.17-14.25 AV: 8 NL: 2.93E4  
T: FTMS + p NSI d Full ms2 584.3674@etd8.70 [120.0000-2000.0000]

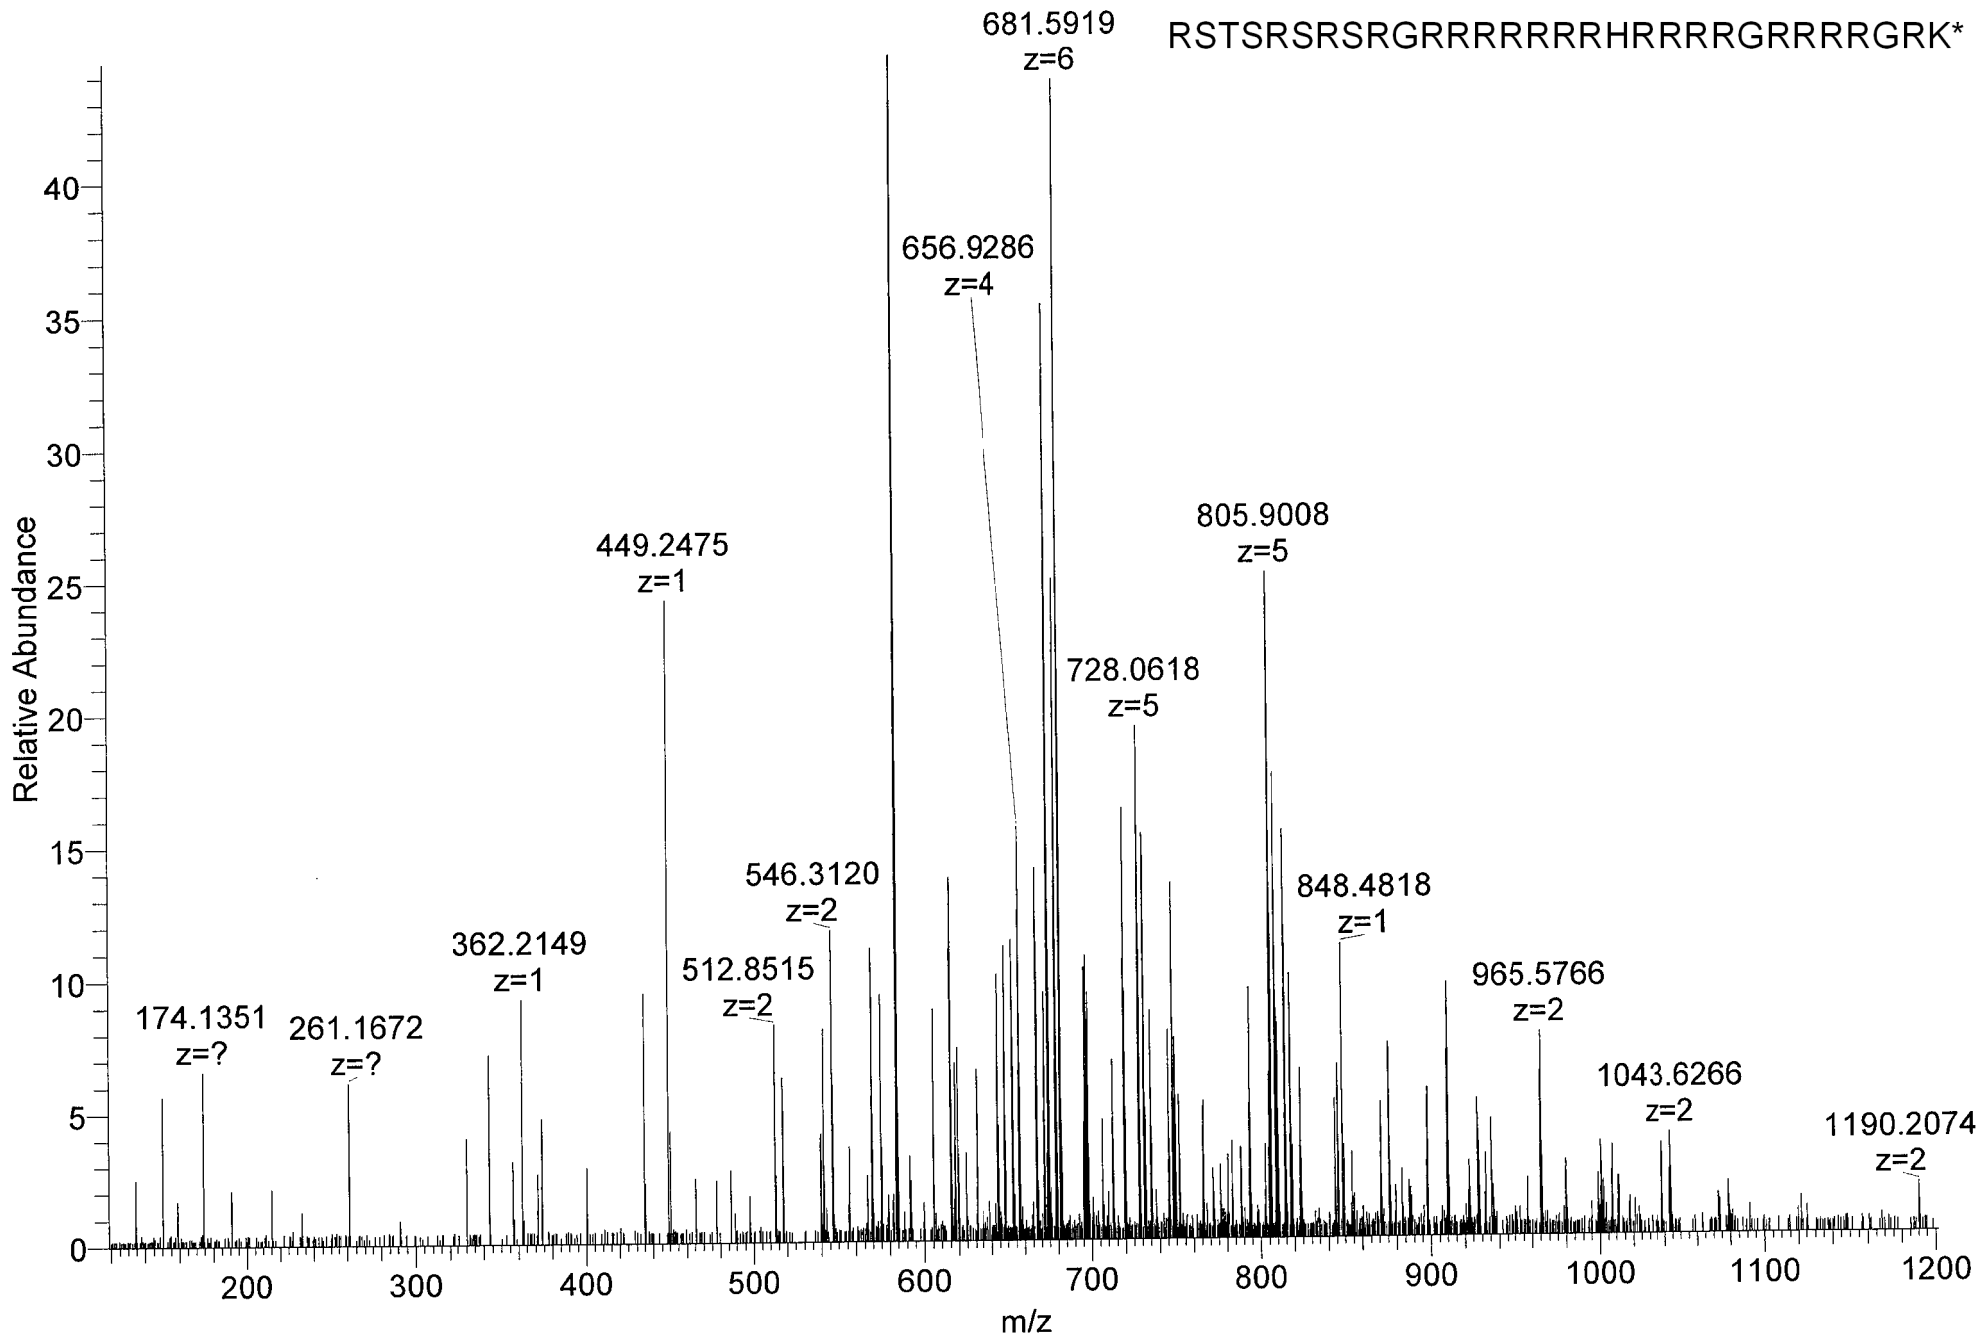

021519\_0p2perYellowTube\_Gradient\_DD\_Heat15 #2623-3827 RT: 11.17-14.25 AV: 8 NL: 2.93E4  
T: FTMS + p NSI d Full ms2 584.3674@etd8.70 [120.0000-2000.0000]

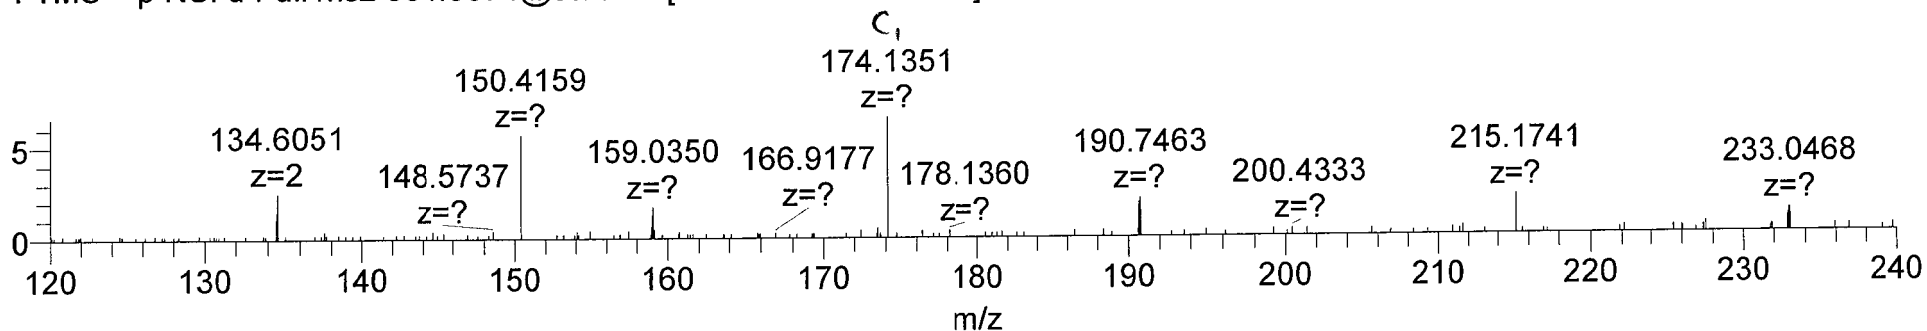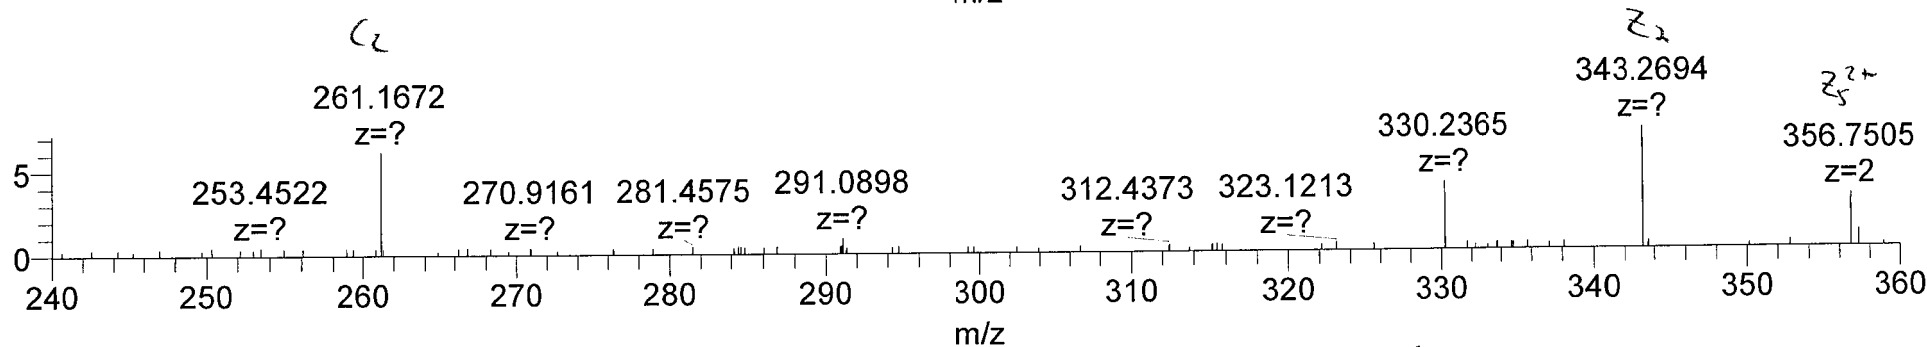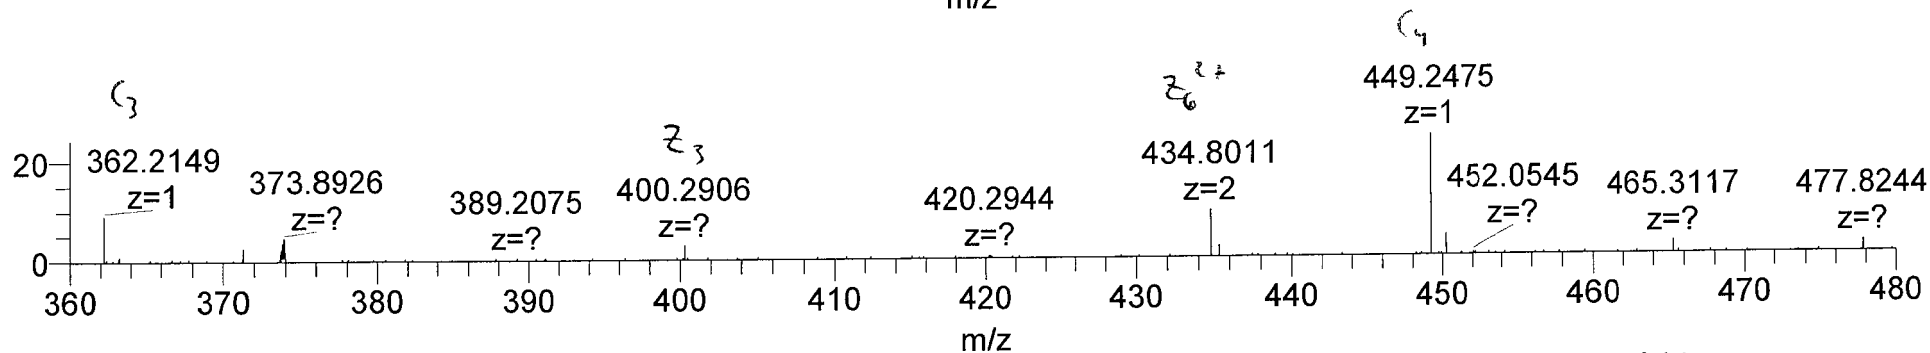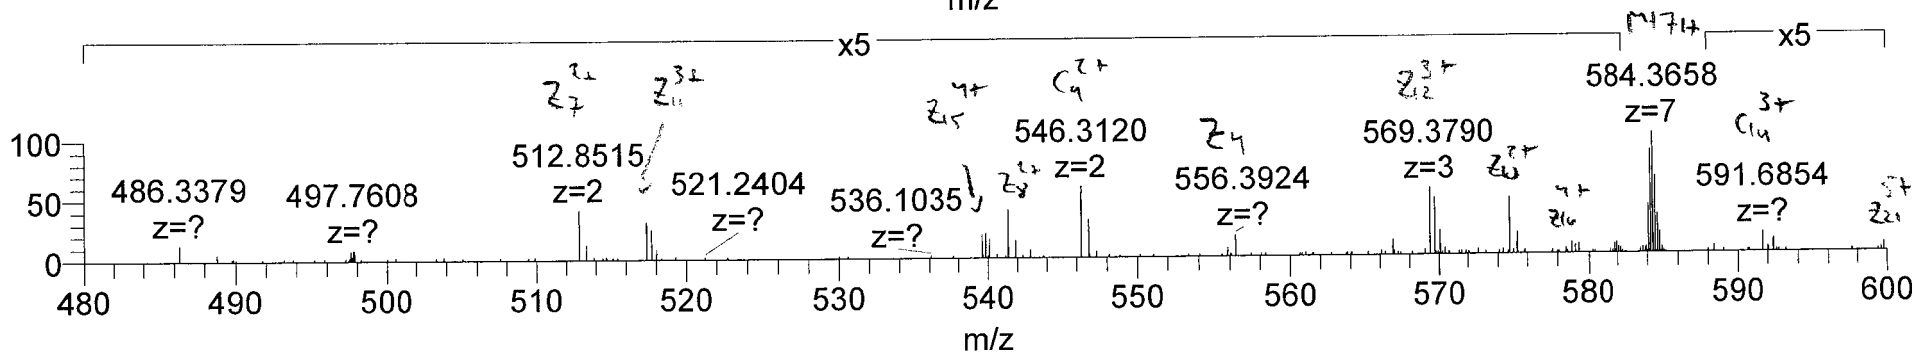



021519\_0p2perYellowTube\_Gradient\_DD\_Heat15 #2623-3827 RT: 11.17-14.25 AV: 8 NL: 1.13E3

T: FTMS + p NSI d Full ms2 584.3674@etd8.70 [120.0000-2000.0000]

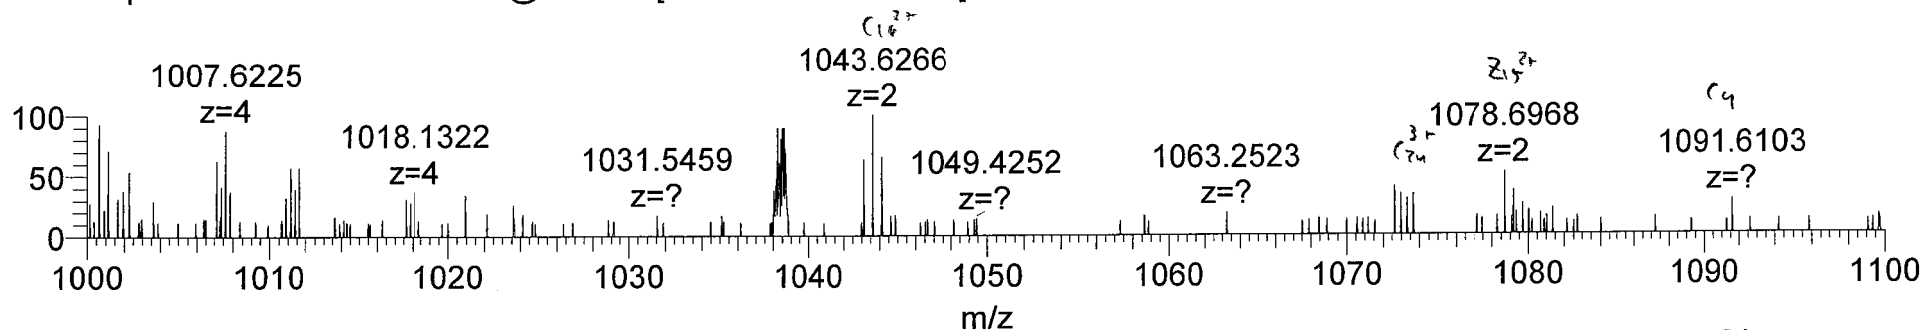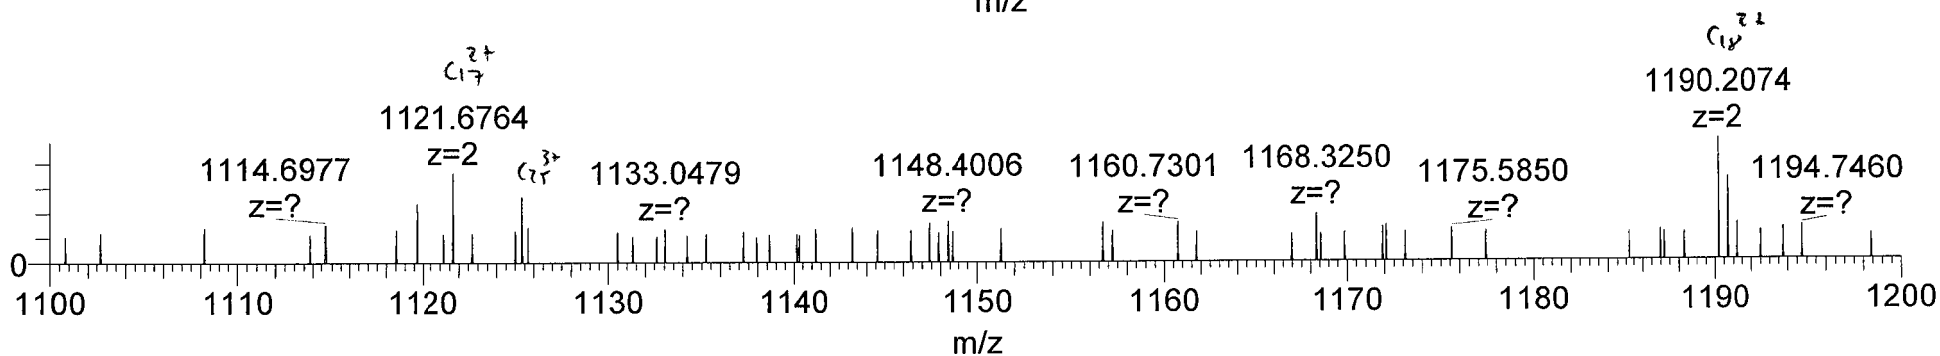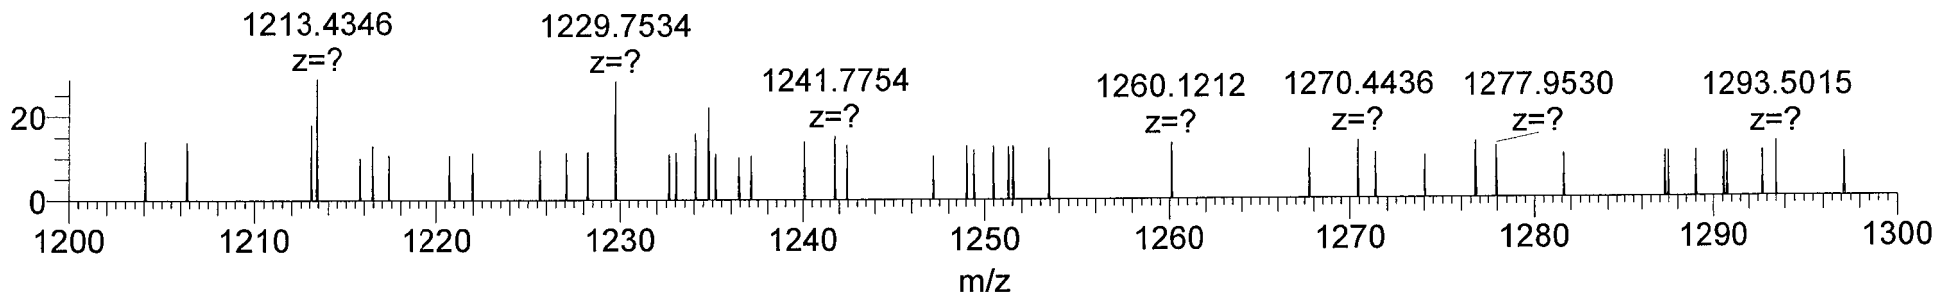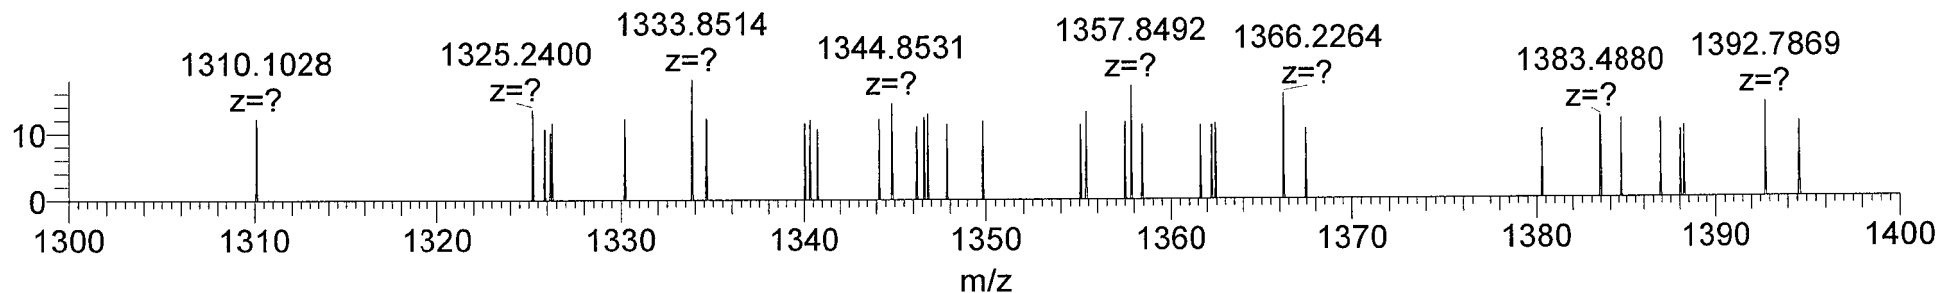

# Fragment Masses

| +5 c ions | +4 c ions | +3 c ions | +2 c ions | +1 c ions |   | Sequence |   | +1 z ions      | +2 z ions | +3 z ions | +4 z ions | +5 z ions |           |          |
|-----------|-----------|-----------|-----------|-----------|---|----------|---|----------------|-----------|-----------|-----------|-----------|-----------|----------|
| 35.6328   | 44.2892   | 58.7165   | 87.5711   | 174.1349  | ✓ | 1        | ✓ | R              | 30        | 4082.5081 | 2041.7577 | 1361.5076 | 1021.3825 | 817.3074 |
| 53.0392   | 66.0472   | 87.7272   | 131.0871  | 261.1670  | ✓ | 2        | ✓ | S              | 29        | 3910.3883 | 1955.6978 | 1304.1343 | 978.3525  | 782.8835 |
| 73.2487   | 91.3091   | 121.4097  | 181.6110  | 362.2146  | ✓ | 3        | ✓ | T              | 28        | 3823.3563 | 1912.1818 | 1275.1236 | 956.5945  | 765.4771 |
| 90.6552   | 113.0671  | 150.4204  | 225.1270  | 449.2467  | ✓ | 4        | ✓ | S              | 27        | 3722.3086 | 1861.6579 | 1241.4410 | 931.3326  | 745.2675 |
| 121.8754  | 152.0924  | 202.4541  | 303.1775  | 605.3478  | ✓ | 5        | ✓ | R              | 26        | 3635.2766 | 1818.1419 | 1212.4304 | 909.5746  | 727.8611 |
| 139.2818  | 173.8504  | 231.4648  | 346.6935  | 692.3798  | ✓ | 6        | ✓ | S              | 25        | 3479.1754 | 1740.0914 | 1160.3967 | 870.5493  | 696.6409 |
| 170.5020  | 212.8757  | 283.4985  | 424.7441  | 848.4809  | ✓ | 7        | ✓ | R              | 24        | 3392.1434 | 1696.5753 | 1131.3860 | 848.7913  | 679.2345 |
| 187.9084  | 234.6337  | 312.5092  | 468.2601  | 935.5130  | ✓ | 8        | ✓ | S              | 23        | 3236.0423 | 1618.5248 | 1079.3523 | 809.7660  | 648.0143 |
| 219.1286  | 273.6590  | 364.5429  | 546.3107  | 1091.6141 | ✓ | 9        | ✓ | R              | 22        | 3149.0103 | 1575.0088 | 1050.3416 | 788.0080  | 630.6079 |
| 230.5329  | 287.9143  | 383.5500  | 574.8214  | 1148.6355 | ✓ | 10       | ✓ | G              | 21        | 2992.9092 | 1496.9582 | 998.3079  | 748.9827  | 599.3877 |
| 261.7531  | 326.9396  | 435.5837  | 652.8720  | 1304.7366 | ✓ | 11       | ✓ | R              | 20        | 2935.8877 | 1466.4475 | 979.3007  | 734.7274  | 587.9834 |
| 292.9734  | 365.9649  | 487.6174  | 730.9225  | 1460.8378 | ✓ | 12       | ✓ | R              | 19        | 2779.7866 | 1390.3969 | 927.2670  | 695.7021  | 556.7631 |
| 324.1936  | 404.9902  | 539.6511  | 808.9731  | 1616.9389 | ✓ | 13       | ✓ | R              | 18        | 2623.6855 | 1312.3464 | 875.2333  | 656.6768  | 525.5429 |
| 355.4138  | 444.0155  | 591.6848  | 887.0236  | 1773.0400 | ✓ | 14       | ✓ | R              | 17        | 2467.5844 | 1234.2958 | 823.1996  | 617.6515  | 494.3227 |
| 386.6340  | 483.0407  | 643.7185  | 965.0742  | 1929.1411 | ✓ | 15       | ✓ | R              | 16        | 2311.4833 | 1156.2453 | 771.1659  | 578.6263  | 463.1025 |
| 417.8543  | 522.0660  | 695.7522  | 1043.1247 | 2085.2422 | ✓ | 16       | ✓ | R              | 15        | 2155.3821 | 1078.1947 | 719.1322  | 539.6010  | 431.8822 |
| 449.0745  | 561.0913  | 747.7860  | 1121.1753 | 2241.3433 | ✓ | 17       | ✓ | R              | 14        | 1999.2810 | 1000.1442 | 667.0985  | 500.5757  | 400.6620 |
| 476.4863  | 595.3560  | 793.4723  | 1189.7047 | 2378.4022 | ✓ | 18       | ✓ | H              | 13        | 1843.1799 | 922.0936  | 615.0648  | 461.5504  | 369.4418 |
| 507.7065  | 634.3813  | 845.5060  | 1267.7553 | 2534.5033 | ✓ | 19       | ✓ | R              | 12        | 1706.1210 | 853.5641  | 569.3785  | 427.2857  | 342.0300 |
| 538.9267  | 673.4066  | 897.5397  | 1345.8059 | 2690.6044 | ✓ | 20       | ✓ | R              | 11        | 1550.0199 | 775.5136  | 517.3448  | 388.2604  | 310.8098 |
| 570.1469  | 712.4318  | 949.5734  | 1423.8564 | 2846.7056 | ✓ | 21       | ✓ | R              | 10        | 1393.9188 | 697.4630  | 465.3111  | 349.2352  | 279.5896 |
| 601.3672  | 751.4571  | 1001.6071 | 1501.9070 | 3002.8067 | ✓ | 22       | ✓ | R              | 9         | 1237.8177 | 619.4125  | 413.2774  | 310.2099  | 248.3694 |
| 612.7714  | 765.7125  | 1020.6142 | 1530.4177 | 3059.8281 | ✓ | 23       | ✓ | G              | 8         | 1081.7166 | 541.3619  | 361.2437  | 271.1846  | 217.1491 |
| 643.9917  | 804.7378  | 1072.6479 | 1608.4683 | 3215.9292 | ✓ | 24       | ✓ | R              | 7         | 1024.6951 | 512.8512  | 342.2366  | 256.9292  | 205.7448 |
| 675.2119  | 843.7630  | 1124.6816 | 1686.5188 | 3372.0303 | ✓ | 25       | ✓ | R              | 6         | 868.5940  | 434.8006  | 290.2028  | 217.9040  | 174.5246 |
| 706.4321  | 882.7883  | 1176.7153 | 1764.5694 | 3528.1315 | ✓ | 26       | ✓ | R              | 5         | 712.4929  | 356.7501  | 238.1691  | 178.8787  | 143.3044 |
| 737.6523  | 921.8136  | 1228.7490 | 1842.6199 | 3684.2326 | ✓ | 27       | ✓ | R              | 4         | 556.3918  | 278.6995  | 186.1354  | 139.8534  | 112.0842 |
| 749.0566  | 936.0690  | 1247.7562 | 1871.1307 | 3741.2540 | ✓ | 28       | ✓ | G              | 3         | 400.2907  | 200.6490  | 134.1017  | 100.8281  | 80.8640  |
| 780.2768  | 975.0942  | 1299.7899 | 1949.1812 | 3897.3551 | ✓ | 29       | ✓ | R              | 2         | 343.2692  | 172.1382  | 115.0946  | 86.5728   | 69.4597  |
| 817.3074  | 1021.3825 | 1361.5076 | 2041.7577 | 4082.5081 | ✓ | 30       | ✓ | K              | 1         | 187.1681  | 94.0877   | 63.0609   | 47.5475   | 38.2394  |
|           |           |           |           |           |   |          |   | (cterm + 56... |           |           |           |           |           |          |

021519\_0p2perYellowTube\_Gradient\_DD\_Heat15 #2613-3882 RT: 12.64-14.83 AV: 7 NL: 2.12E4  
T: FTMS + p NSI d Full ms2 541.0607@etd8.70 [120.0000-2000.0000]

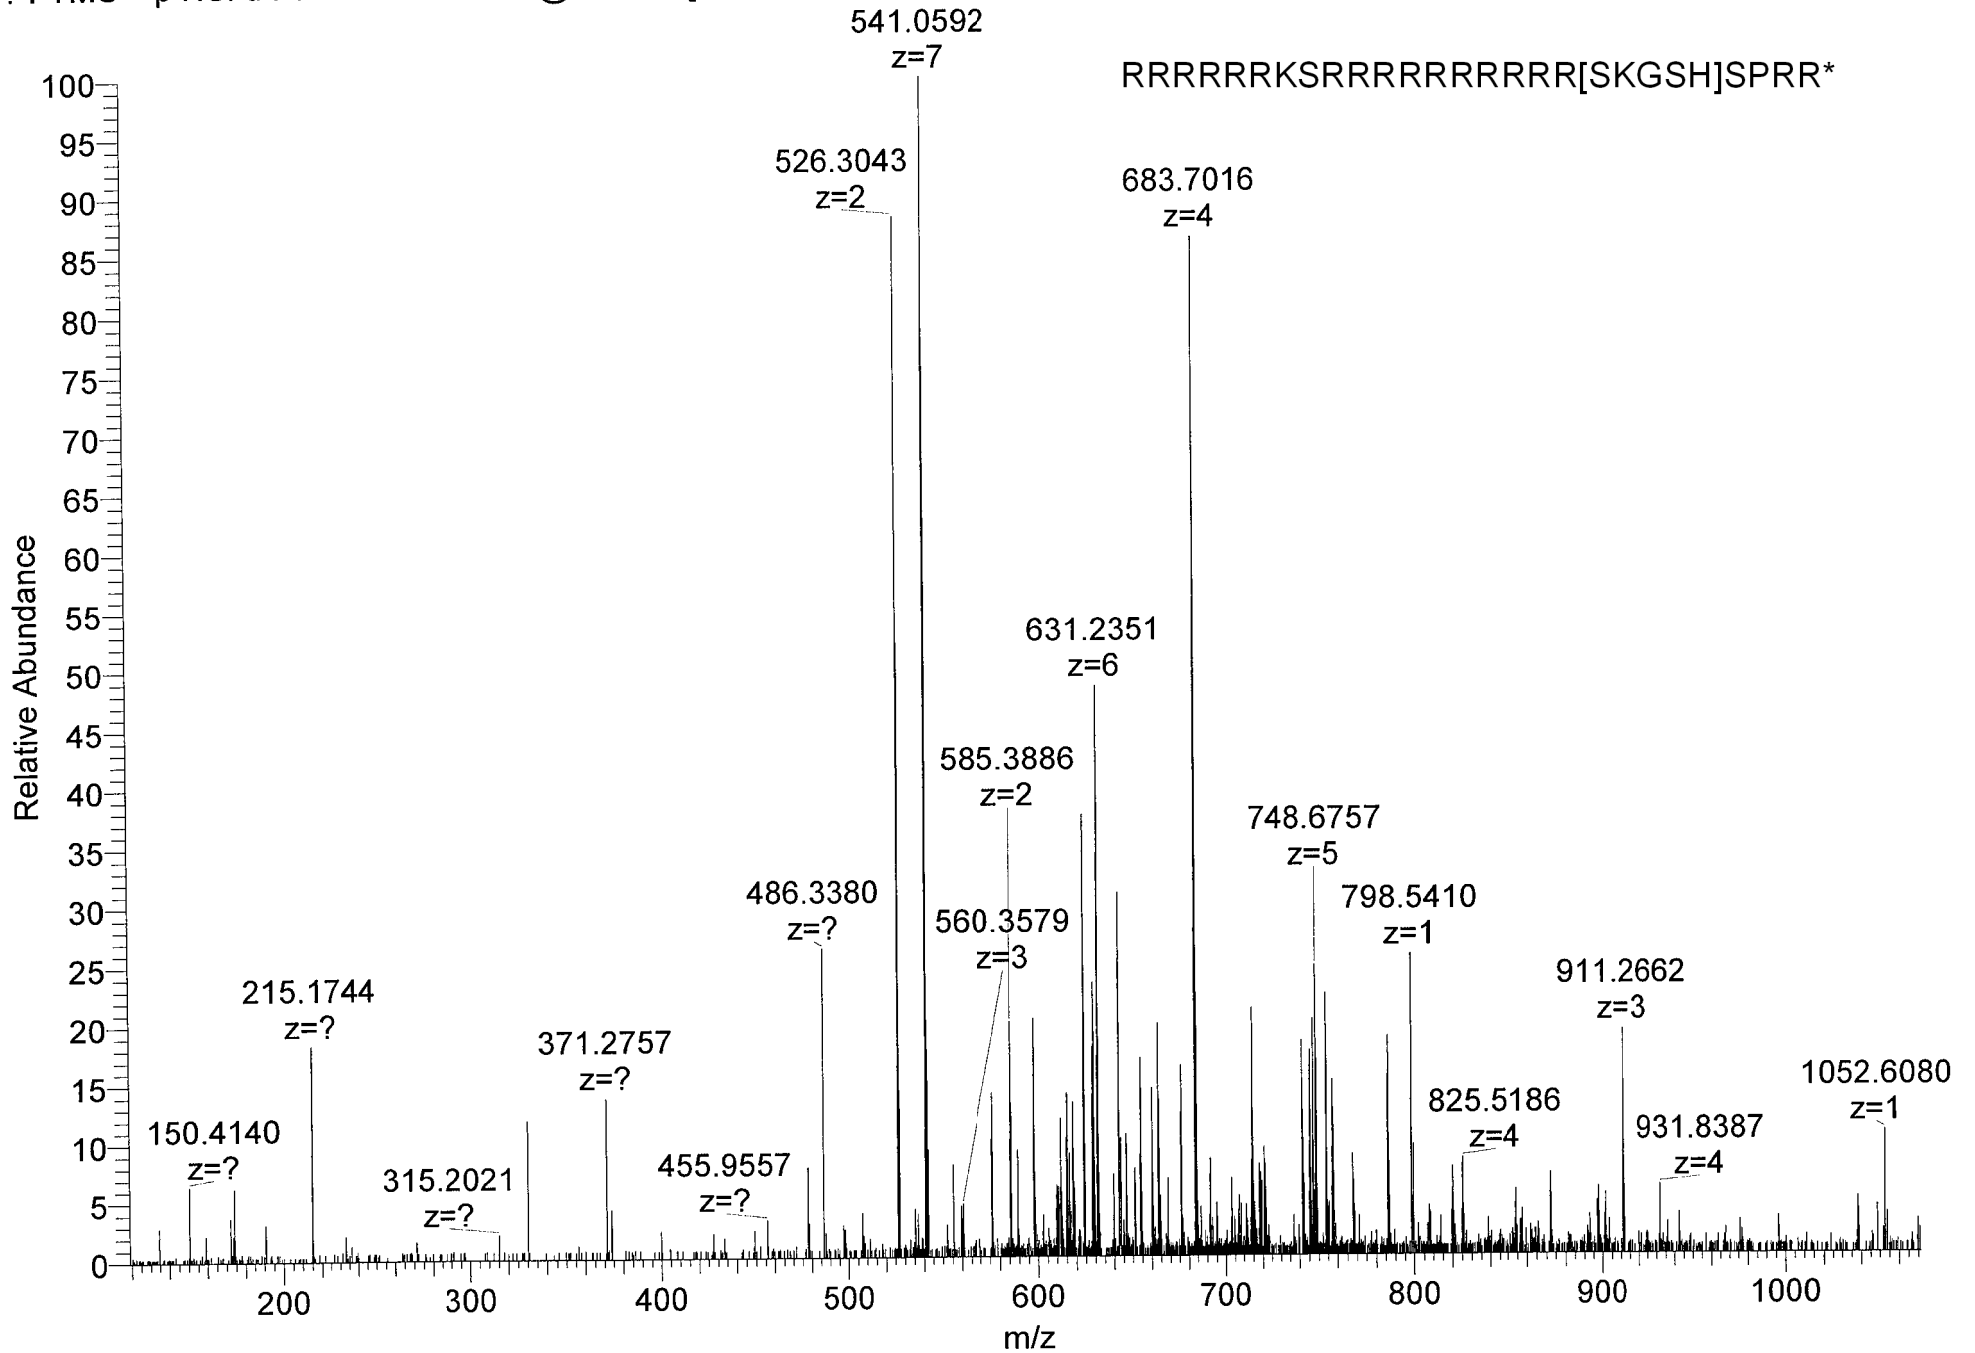

021519\_Op2perYellowTube\_Gradient\_DD\_Heat15 #2613-3881 RT: 12.64-14.83 AV: 7 NL: 2.12E4  
T: FTMS + p NSI d Fullms2 541.0607@etd8.70 [120.0000-2000.0000]

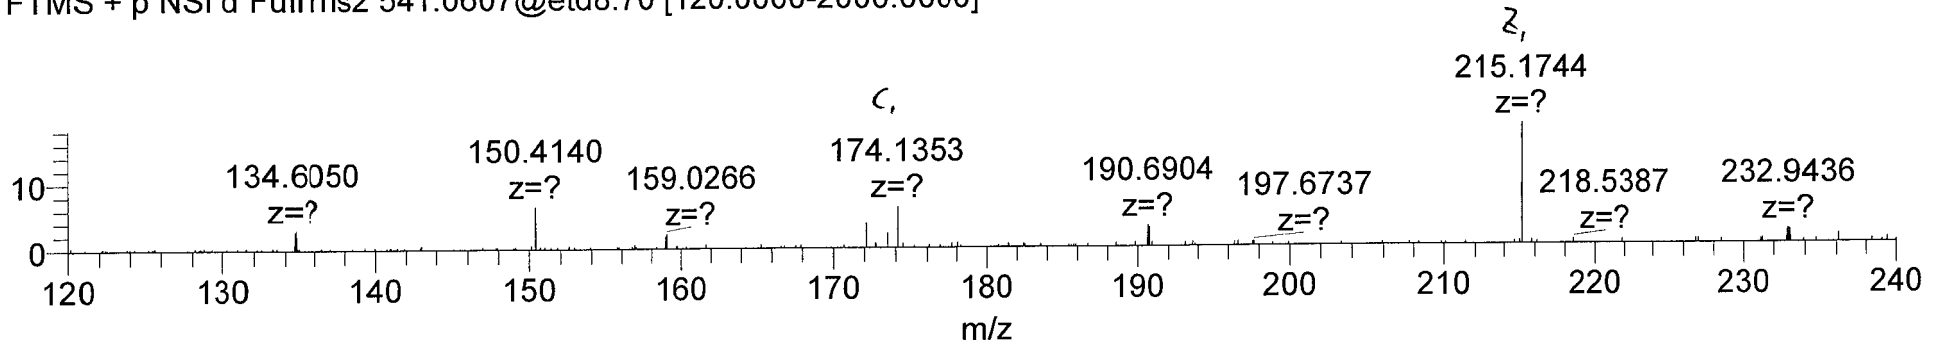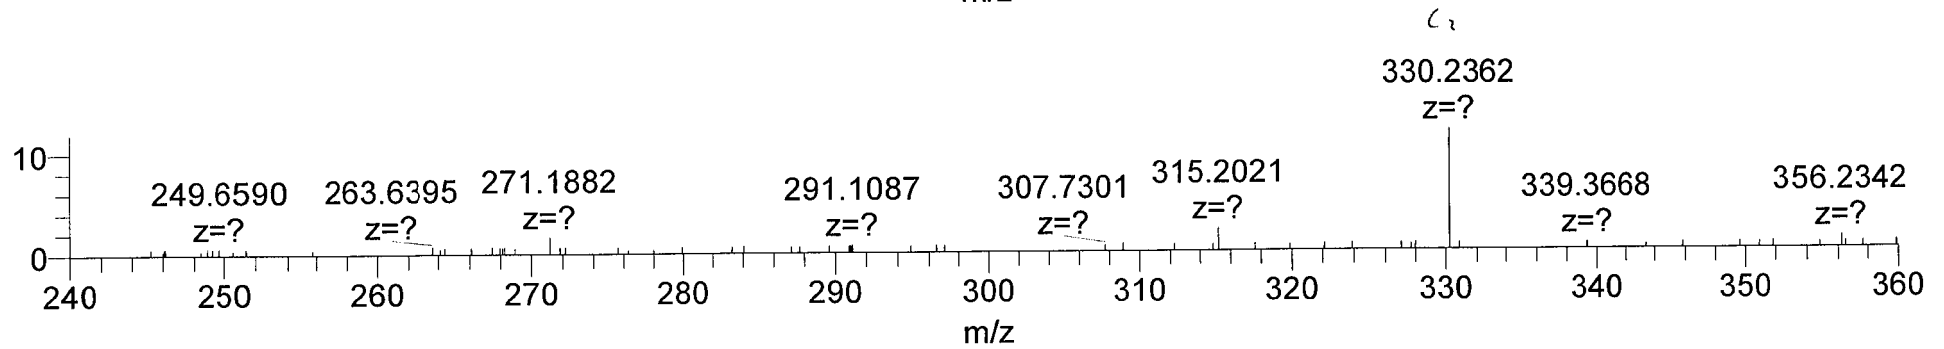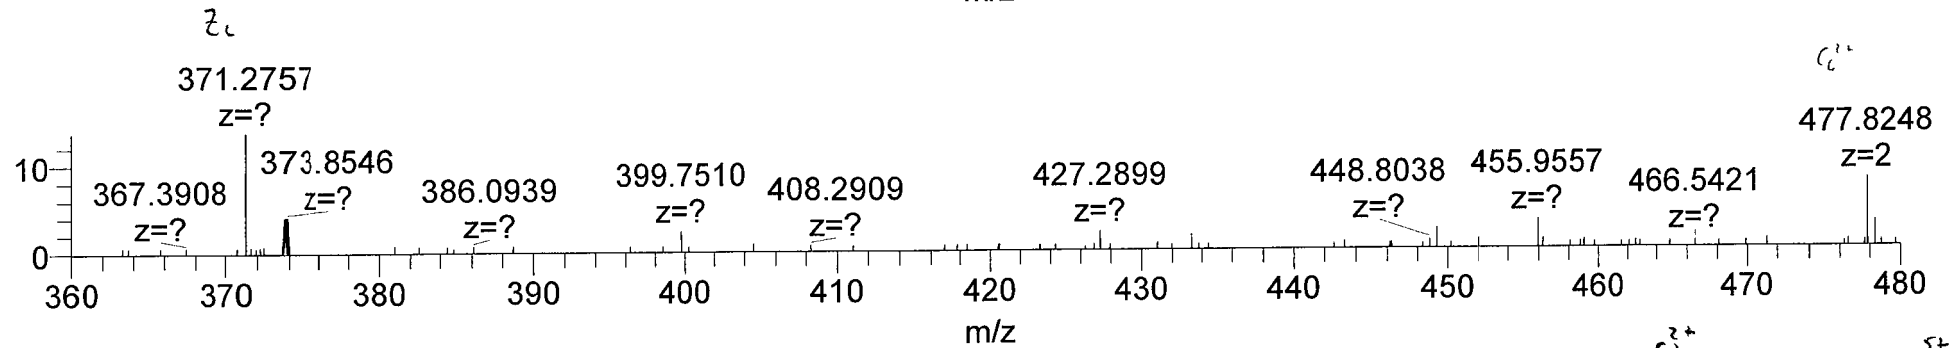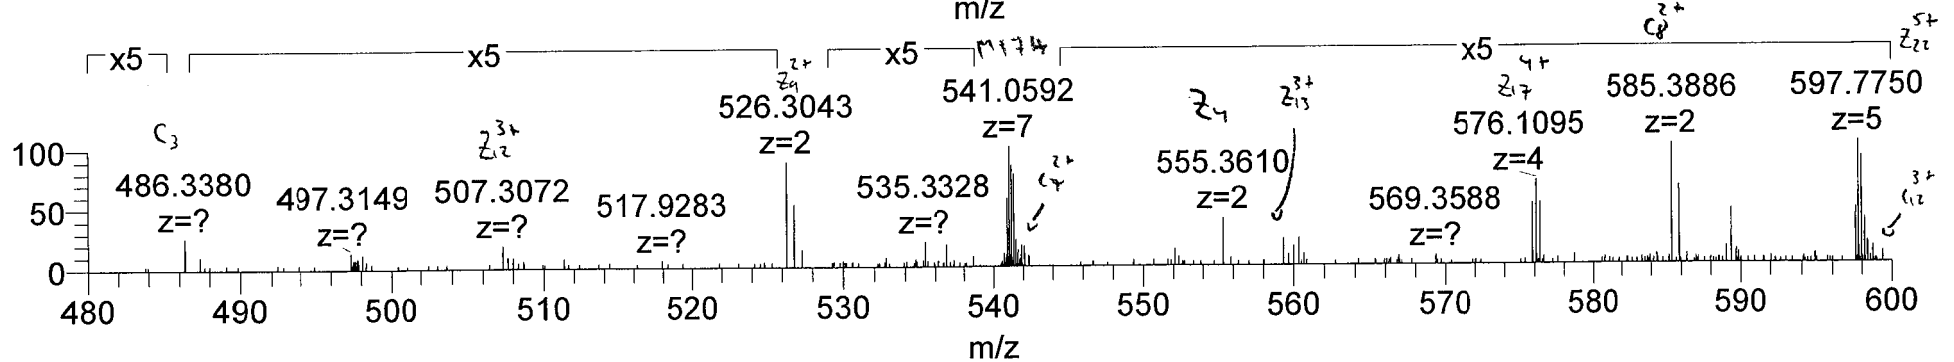



# Fragment Masses

| +6 c ions | +5 c ions | +4 c ions | +3 c ions | +2 c ions | +1 c ions | Sequence     | +1 z ions | +2 z ions | +3 z ions | +4 z ions | +5 z ions | +6 z ions |          |          |
|-----------|-----------|-----------|-----------|-----------|-----------|--------------|-----------|-----------|-----------|-----------|-----------|-----------|----------|----------|
| 29.8619   | 35.6328   | 44.2892   | 58.7165   | 87.5711   | 174.1349  | 1            | R         | 27        | 3780.3630 | 1890.6851 | 1260.7925 | 945.8462  | 756.8784 | 630.8999 |
| 55.8787   | 66.8530   | 83.3145   | 110.7502  | 165.6217  | 330.2360  | 2            | R         | 26        | 3608.2432 | 1804.6252 | 1203.4192 | 902.8163  | 722.4545 | 602.2133 |
| 81.8956   | 98.0733   | 122.3397  | 162.7839  | 243.6722  | 486.3372  | 3            | R         | 25        | 3452.1421 | 1726.5747 | 1151.3855 | 863.7910  | 691.2342 | 576.1964 |
| 107.9124  | 129.2935  | 161.3650  | 214.8176  | 321.7228  | 642.4383  | 4            | R         | 24        | 3295.0410 | 1648.5241 | 1099.3518 | 824.7657  | 660.0140 | 550.1796 |
| 133.9293  | 160.5137  | 200.3903  | 266.8513  | 399.7733  | 798.5394  | 5            | R         | 23        | 3139.9399 | 1570.4736 | 1047.3181 | 785.7404  | 628.7938 | 524.1627 |
| 159.9461  | 191.7339  | 239.4156  | 318.8850  | 477.8239  | 954.6405  | 6            | R         | 22        | 2983.8387 | 1492.4230 | 995.2844  | 746.7151  | 597.5736 | 498.1459 |
| 181.2953  | 217.3529  | 271.4393  | 361.5833  | 541.8714  | 1082.7355 | 7            | K         | 21        | 2827.7376 | 1414.3725 | 943.2507  | 707.6899  | 566.3533 | 472.1290 |
| 195.8006  | 234.7593  | 293.1973  | 390.5940  | 585.3874  | 1169.7675 | 8            | S         | 20        | 2699.6427 | 1350.3250 | 900.5524  | 675.6661  | 540.7344 | 450.7798 |
| 221.8175  | 265.9795  | 332.2226  | 442.6277  | 663.4379  | 1325.8686 | 9            | R         | 19        | 2612.6106 | 1306.8090 | 871.5417  | 653.9081  | 523.3279 | 436.2745 |
| 247.8343  | 297.1998  | 371.2479  | 494.6614  | 741.4885  | 1481.9697 | 10           | R         | 18        | 2456.5095 | 1228.7584 | 819.5080  | 614.8828  | 492.1077 | 410.2577 |
| 273.8512  | 328.4200  | 410.2732  | 546.8951  | 819.5390  | 1638.0708 | 11           | R         | 17        | 2300.4084 | 1150.7078 | 767.4743  | 575.8576  | 460.8875 | 384.2408 |
| 299.8681  | 359.6402  | 449.2984  | 598.7288  | 897.5896  | 1794.1719 | 12           | R         | 16        | 2144.3073 | 1072.6573 | 715.4406  | 536.8323  | 429.6873 | 358.2239 |
| 325.8849  | 390.8604  | 488.3237  | 650.7625  | 975.6402  | 1950.2730 | 13           | R         | 15        | 1988.2062 | 994.6067  | 663.4069  | 497.8070  | 398.4471 | 332.2071 |
| 351.9018  | 422.0807  | 527.3490  | 702.7962  | 1053.6907 | 2106.3741 | 14           | R         | 14        | 1832.1051 | 916.5562  | 611.3732  | 458.7817  | 367.2268 | 306.1902 |
| 377.9186  | 453.3009  | 566.3743  | 754.8299  | 1131.7413 | 2262.4753 | 15           | R         | 13        | 1676.0040 | 838.5056  | 559.3395  | 419.7565  | 336.0066 | 280.1734 |
| 403.9355  | 484.5211  | 605.3995  | 806.8636  | 1209.7918 | 2418.5764 | 16           | R         | 12        | 1519.9029 | 760.4551  | 507.3058  | 380.7312  | 304.7864 | 254.1565 |
| 429.9523  | 515.7413  | 644.4248  | 858.8973  | 1287.8424 | 2574.6775 | 17           | R         | 11        | 1363.8018 | 682.4045  | 455.2721  | 341.7059  | 273.5662 | 228.1397 |
| 455.9692  | 546.9615  | 683.4501  | 910.9310  | 1365.8929 | 2730.7786 | 18           | R         | 10        | 1207.7006 | 604.3540  | 403.2384  | 302.6806  | 242.3459 | 202.1228 |
| 470.4745  | 564.3679  | 705.2081  | 939.9417  | 1409.4089 | 2817.8106 | 19           | S         | 9         | 1051.5995 | 526.3034  | 351.2047  | 263.6553  | 211.1257 | 176.1060 |
| 491.8237  | 589.9889  | 737.2319  | 982.6400  | 1473.4564 | 2945.9056 | 20           | K         | 8         | 964.5675  | 482.7874  | 322.1940  | 241.8973  | 193.7193 | 161.6006 |
| 501.3272  | 601.3912  | 751.4872  | 1001.6472 | 1501.9672 | 3002.9270 | 21           | G         | 7         | 836.4725  | 418.7399  | 279.4957  | 209.8736  | 168.1003 | 140.2515 |
| 515.8326  | 618.7976  | 773.2452  | 1030.6579 | 1545.4832 | 3089.9591 | 22           | S         | 6         | 779.4511  | 390.2292  | 260.4885  | 195.6182  | 156.6860 | 130.7479 |
| 538.6757  | 646.2084  | 807.5100  | 1076.3442 | 1614.0126 | 3227.0180 | 23           | H         | 5         | 692.4190  | 346.7132  | 231.4779  | 173.8602  | 139.2896 | 116.2426 |
| 553.1811  | 663.6158  | 829.2680  | 1105.3549 | 1657.5288 | 3314.0580 | 24           | S         | 4         | 555.3601  | 278.1837  | 185.7916  | 139.5955  | 111.8778 | 93.3994  |
| 569.3565  | 683.0264  | 853.5312  | 1137.7058 | 1706.0550 | 3411.1028 | 25           | P         | 3         | 468.3281  | 234.6677  | 136.7869  | 117.8675  | 94.4744  | 78.8941  |
| 595.3734  | 714.2466  | 892.5584  | 1189.7395 | 1784.1056 | 3567.2039 | 26           | R         | 2         | 371.2753  | 186.1413  | 124.4300  | 93.5743   | 75.0609  | 62.7186  |
| 630.9999  | 756.8784  | 945.8462  | 1260.7925 | 1890.6851 | 3780.3630 | 27           | R         | 1         | 215.1742  | 108.0908  | 72.3963   | 54.5490   | 43.8407  | 36.7018  |
|           |           |           |           |           |           | (clerm + 56. |           |           |           |           |           |           |          |          |

021519\_0p2perYellowTube\_Gradient\_DD\_Heat15 #2887-3608 RT: 11.77-13.95 AV: 13 NL: 1.61E4  
T: FTMS + p NSI d Full ms2 691.2317@etd11.84 [120.0000-2000.0000]

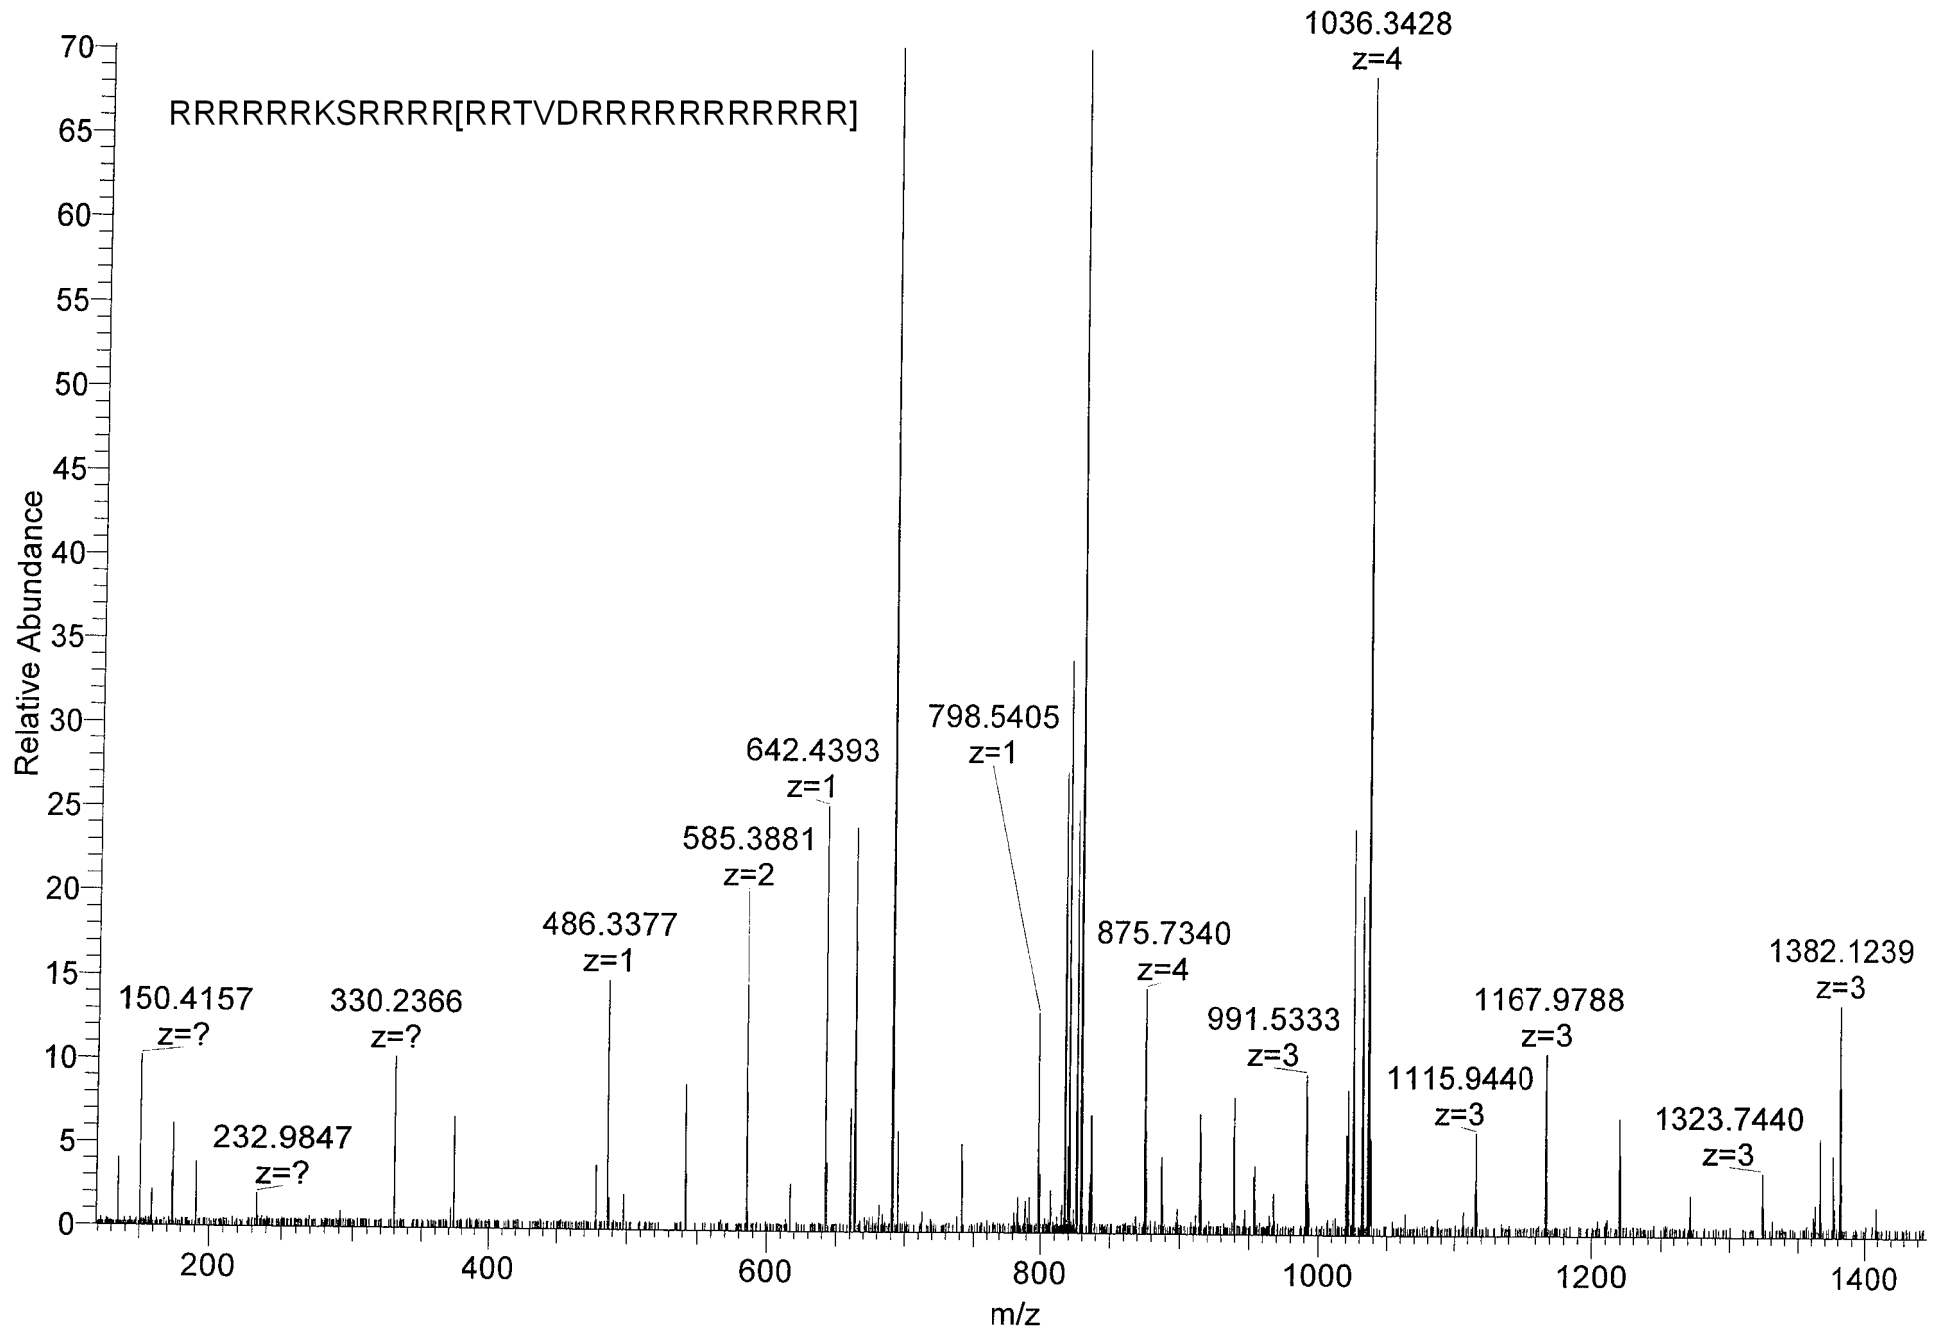

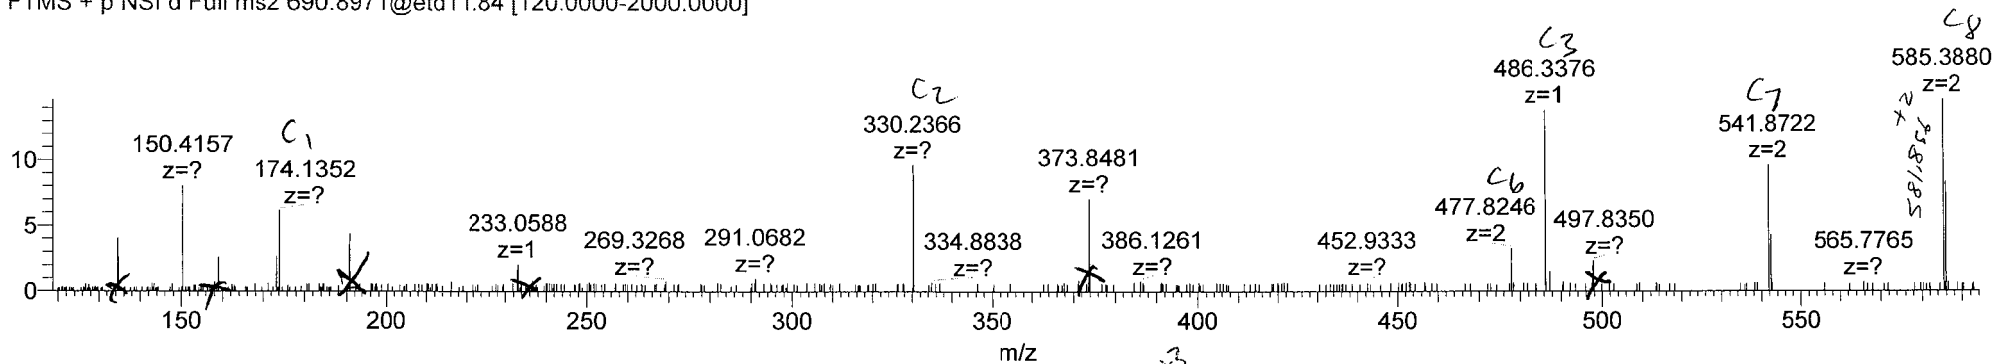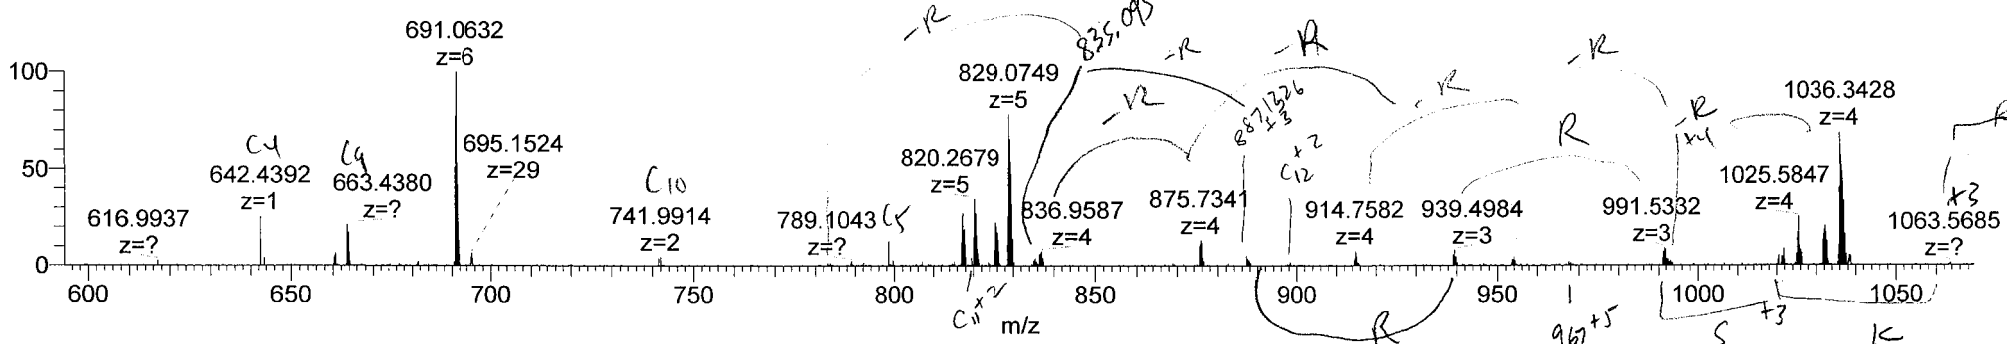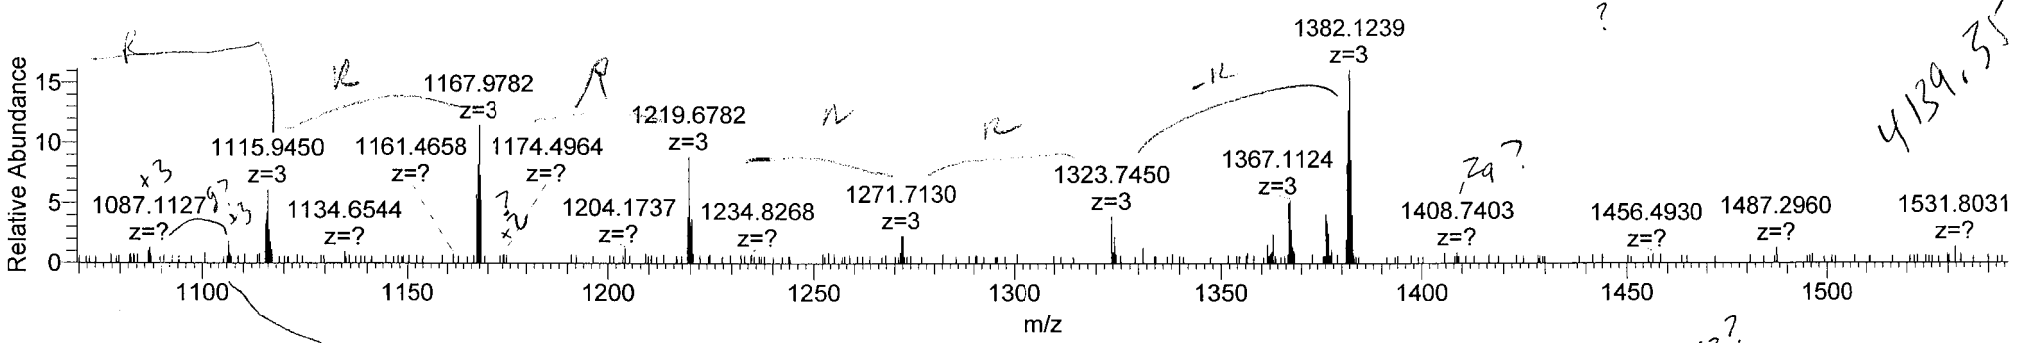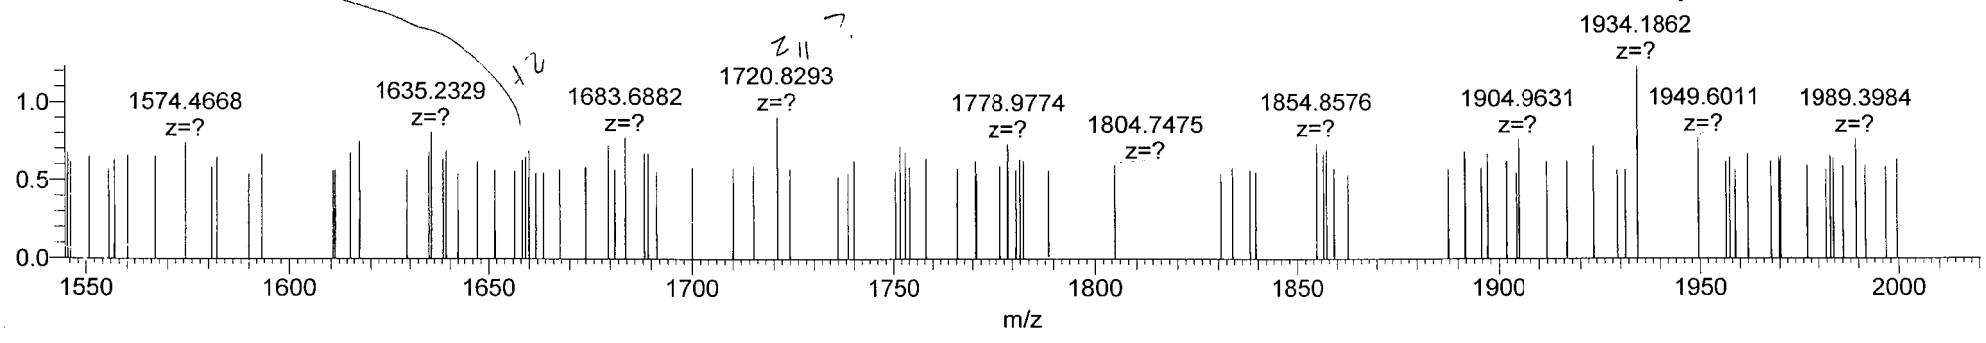

# Fragment Masses

| +4 c ions | +3 c ions | +2 c ions  | +1 c ions  |    | Sequence |    | +1 z ions | +2 z ions   | +3 z ions   | +4 z ions  |
|-----------|-----------|------------|------------|----|----------|----|-----------|-------------|-------------|------------|
| 44.2892   | 58.7165   | 87.5711    | 174.1349 ✓ | 1  | R        | 28 | 4139.6134 | 2070.3103   | 1380.5427   | 1035.6588  |
| 83.3145   | 110.7502  | 165.6217   | 330.2360 ✓ | 2  | R        | 27 | 3967.4936 | 1984.2504   | 1323.1694 ✓ | 992.6289 ✓ |
| 122.3397  | 162.7839  | 243.6722   | 486.3372 ✓ | 3  | R        | 26 | 3811.3925 | 1906.1999   | 1271.1357 ✓ | 953.6036 ✓ |
| 161.3650  | 214.8176  | 321.7228   | 642.4383 ✓ | 4  | R        | 25 | 3655.2914 | 1828.1493   | 1219.1020 ✓ | 914.5783 ✓ |
| 200.3903  | 266.8513  | 399.7733   | 798.5394 ✓ | 5  | R        | 24 | 3499.1903 | 1750.0988   | 1167.0683 ✓ | 875.5530 ✓ |
| 239.4156  | 318.8850  | 477.8239   | 954.6405 ✓ | 6  | R        | 23 | 3343.0891 | 1672.0482   | 1115.0346 ✓ | 836.5277 ✓ |
| 271.4393  | 361.5833  | 541.8714 ✓ | 1082.7355  | 7  | K        | 22 | 3186.9880 | 1593.9977   | 1063.0009 ✓ | 797.5025   |
| 293.1973  | 390.5940  | 585.3874 ✓ | 1169.7675  | 8  | S        | 21 | 3058.8931 | 1529.9502   | 1020.3025 ✓ | 765.4787   |
| 332.2226  | 442.6277  | 663.4379 ✓ | 1325.8686  | 9  | R        | 20 | 2971.8610 | 1486.4342   | 991.2919 ✓  | 743.7207   |
| 371.2479  | 494.6614  | 741.4885 ✓ | 1481.9697  | 10 | R        | 19 | 2815.7599 | 1408.3836   | 939.2582 ✓  | 704.6954   |
| 410.2732  | 546.6951  | 819.5390 ✓ | 1638.0708  | 11 | R        | 18 | 2659.6588 | 1330.3330   | 887.2245 ✓  | 665.6702   |
| 449.2984  | 598.7288  | 897.5896 ✓ | 1794.1719  | 12 | R        | 17 | 2503.5577 | 1252.2825   | 835.1908 ✓  | 626.6449   |
| 488.3237  | 650.7625  | 975.6402   | 1950.2730  | 13 | R        | 16 | 2347.4566 | 1174.2319 ✓ | 783.1570 ✓  | 587.6196   |
| 527.3490  | 702.7962  | 1053.6907  | 2106.3741  | 14 | R        | 15 | 2191.3555 | 1096.1814   | 731.1233    | 548.5943   |
| 552.6109  | 736.4788  | 1104.2146  | 2207.4218  | 15 | T        | 14 | 2035.2544 | 1018.1308   | 679.0896    | 509.5691   |
| 577.3780  | 769.5016  | 1153.7488  | 2306.4902  | 16 | V        | 13 | 1934.2067 | 967.6070    | 645.4071    | 484.3071   |
| 606.1348  | 807.8439  | 1211.2622  | 2421.5172  | 17 | D        | 12 | 1835.1383 | 918.0728    | 612.3843    | 459.5400   |
| 645.1600  | 859.8776  | 1289.3128  | 2577.6183  | 18 | R        | 11 | 1720.1113 | 860.5593    | 574.0420    | 430.7833   |
| 684.1853  | 911.9113  | 1367.3633  | 2733.7194  | 19 | R        | 10 | 1564.0102 | 782.5088    | 522.0083    | 391.7580   |
| 723.2106  | 963.9450  | 1445.4139  | 2889.8205  | 20 | R        | 9  | 1407.9091 | 704.4582    | 469.9746    | 352.7327   |
| 762.2359  | 1015.9787 | 1523.4645  | 3045.9216  | 21 | R        | 8  | 1251.8080 | 626.4076    | 417.9409    | 313.7075   |
| 801.2611  | 1068.0124 | 1601.5150  | 3202.0227  | 22 | R        | 7  | 1095.7069 | 548.3571    | 365.9071    | 274.6822   |
| 840.2864  | 1120.0461 | 1679.5656  | 3358.1239  | 23 | R        | 6  | 939.6058  | 470.3065    | 313.8734    | 235.6569   |
| 879.3117  | 1172.0798 | 1757.6161  | 3514.2250  | 24 | R        | 5  | 783.5047  | 392.2560    | 261.8397    | 196.6316   |
| 918.3370  | 1224.1135 | 1835.6667  | 3670.3261  | 25 | R        | 4  | 627.4036  | 314.2054    | 209.8060    | 157.6063   |
| 957.3623  | 1276.1472 | 1913.7172  | 3826.4272  | 26 | R        | 3  | 471.3024  | 236.1549    | 157.7723    | 118.5811   |
| 996.3875  | 1328.1809 | 1991.7678  | 3982.5283  | 27 | R        | 2  | 315.2013  | 158.1043    | 105.7386    | 79.5558    |
| 1035.6588 | 1380.5427 | 2070.3103  | 4139.6134  | 28 | R        | 1  | 159.1002  | 80.0538     | 53.7049     | 40.5305    |

021519\_0p2perYellowTube\_Gradient\_DD\_Heat15 #2617-4457 RT: 11.06-15.59 AV: 11 NL: 1.22E4  
T: FTMS + p NSI d Full ms2 547.0918@etd6.66 [120.0000-2000.0000]

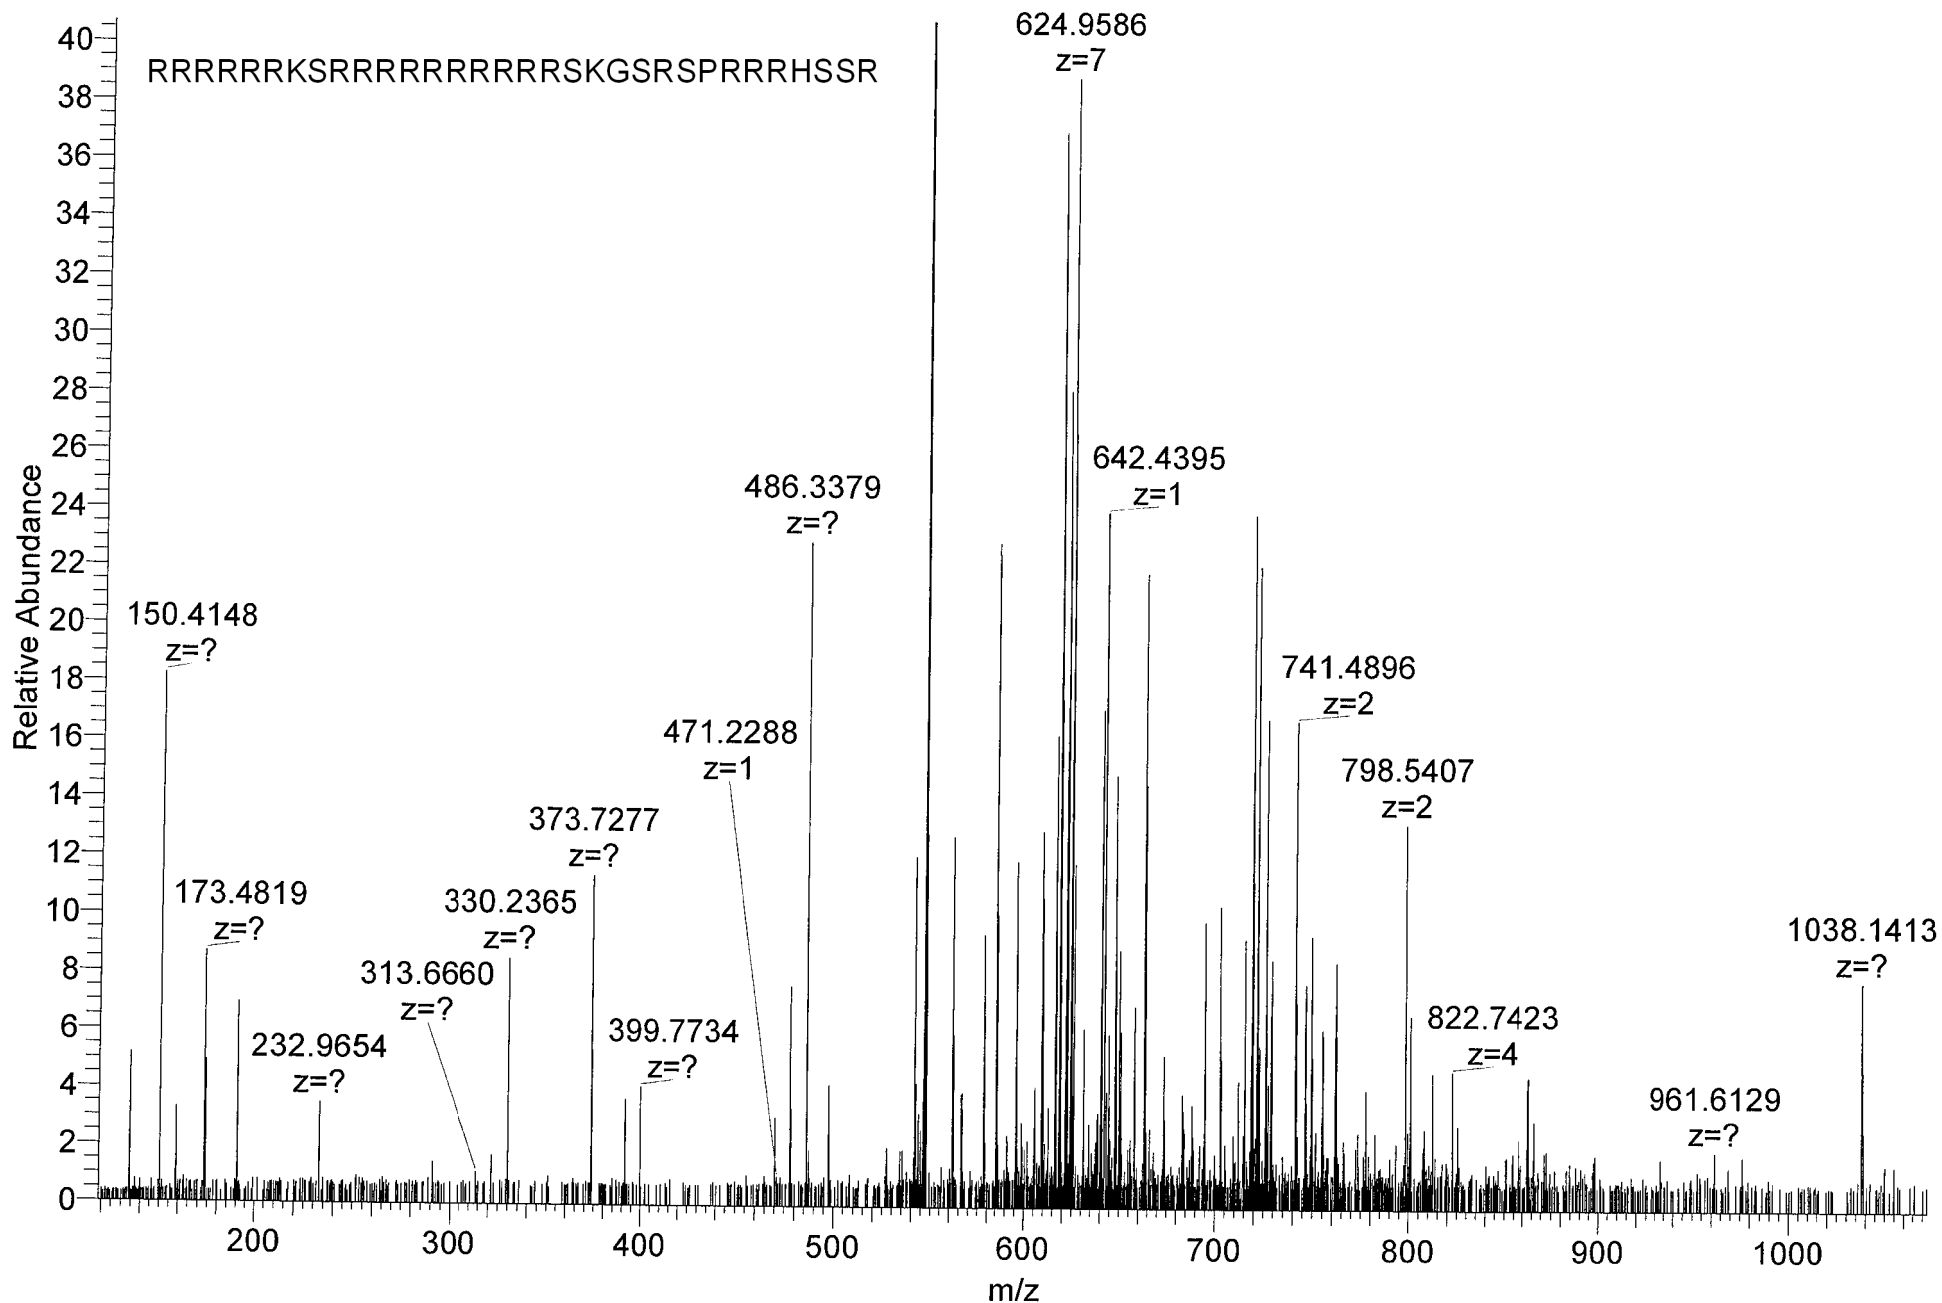

021519\_0p2perYellowTube\_Gradient\_DD\_Heat15 #2617-4458 RT: 11.06-15.59 AV: 11 NL: 1.22E4  
T: FTMS + p NSI d Full ms2 547.0918@etd6.66 [120.0000-2000.0000]

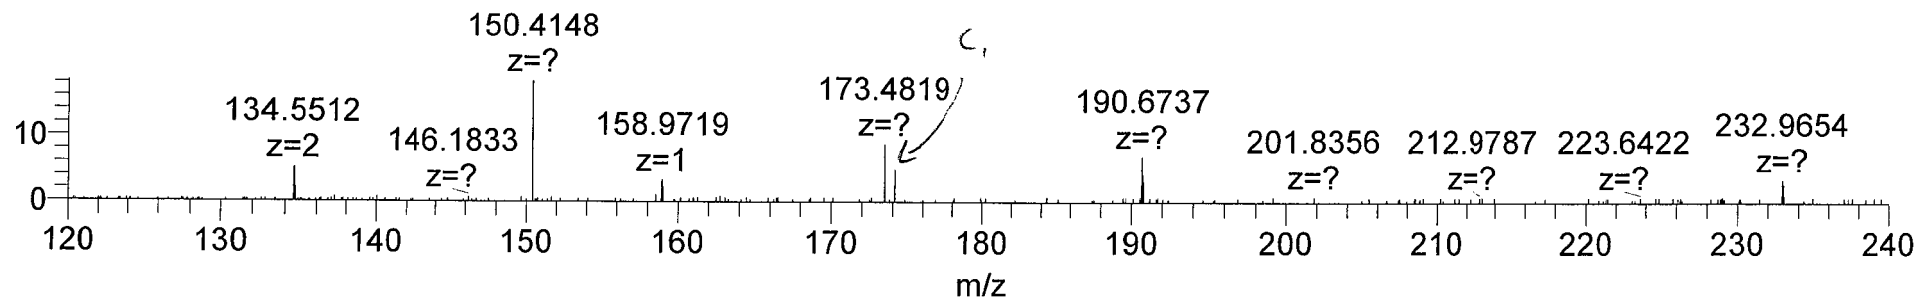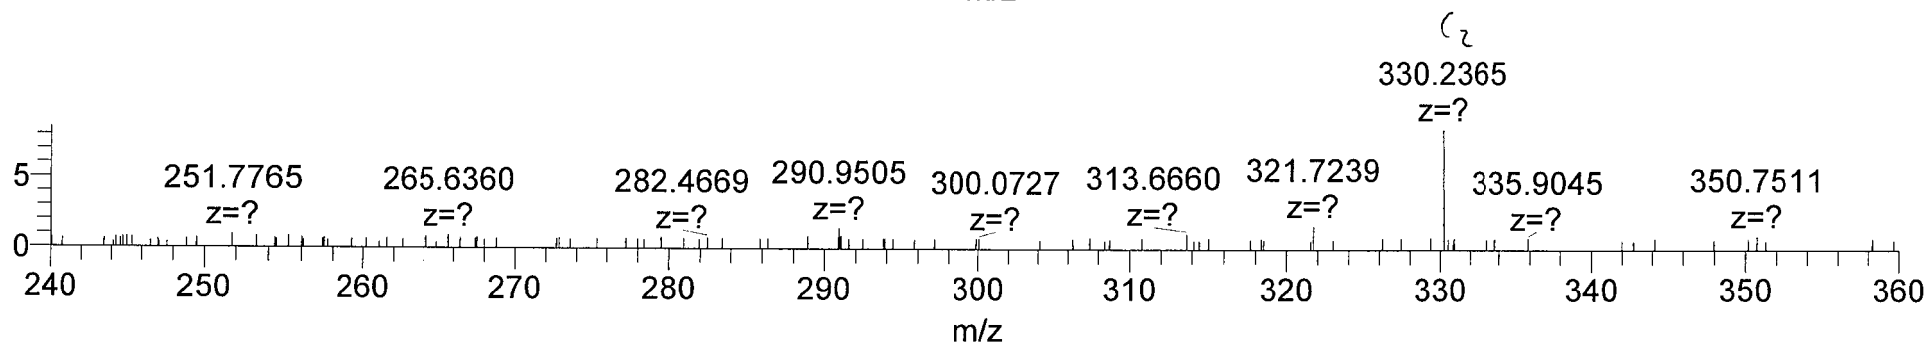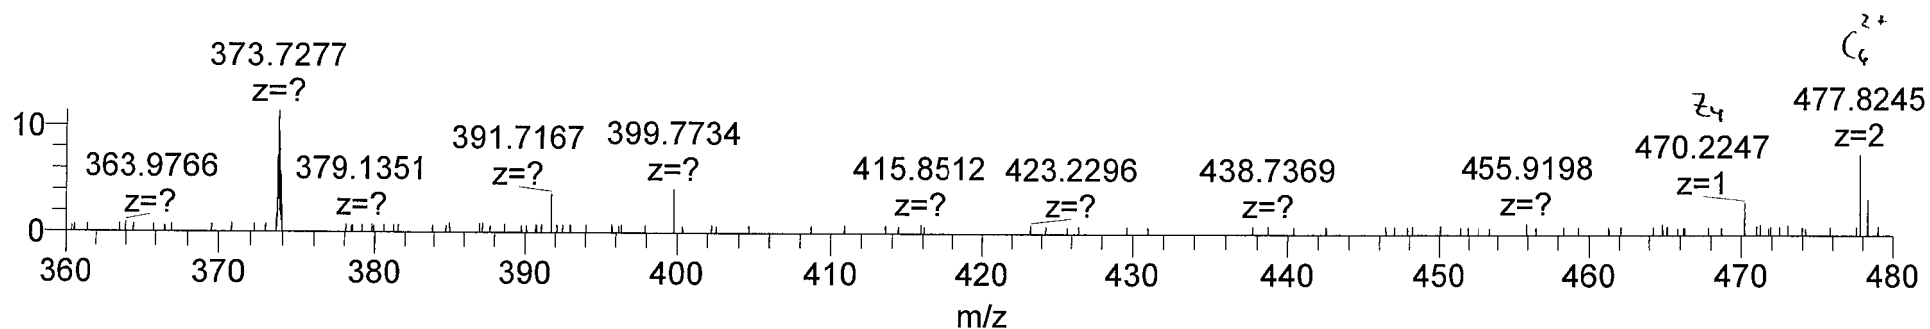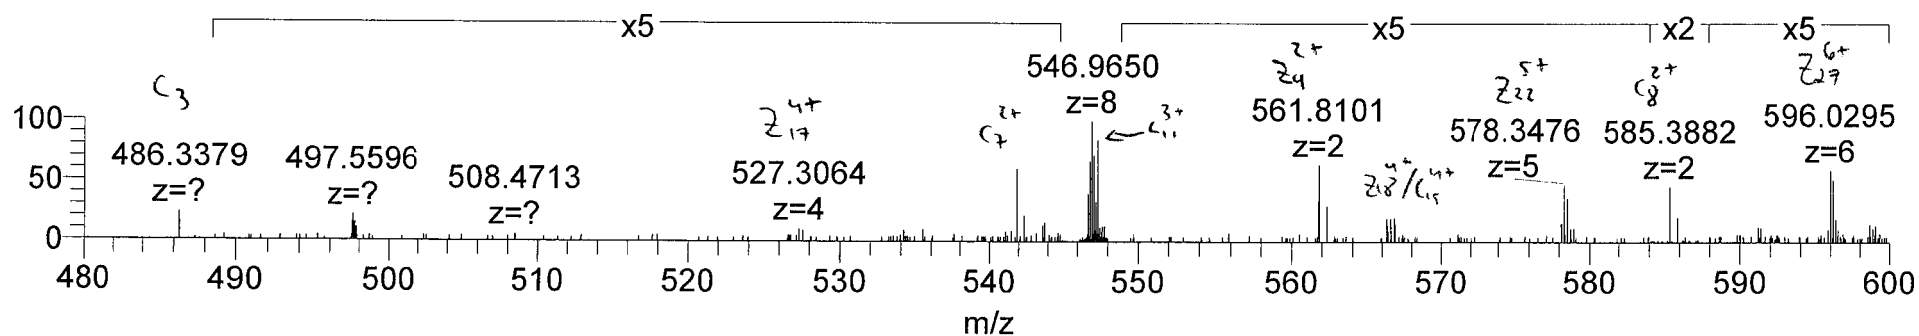

021519\_0p2perYellowTube\_Gradient\_DD\_Heat15 #2617-4458 RT: 11.06-15.59 AV: 11 NL: 4.73E3  
T: FTMS + p NSI d Full ms2 547.0918@etd6.66 [120.0000-2000.0000]

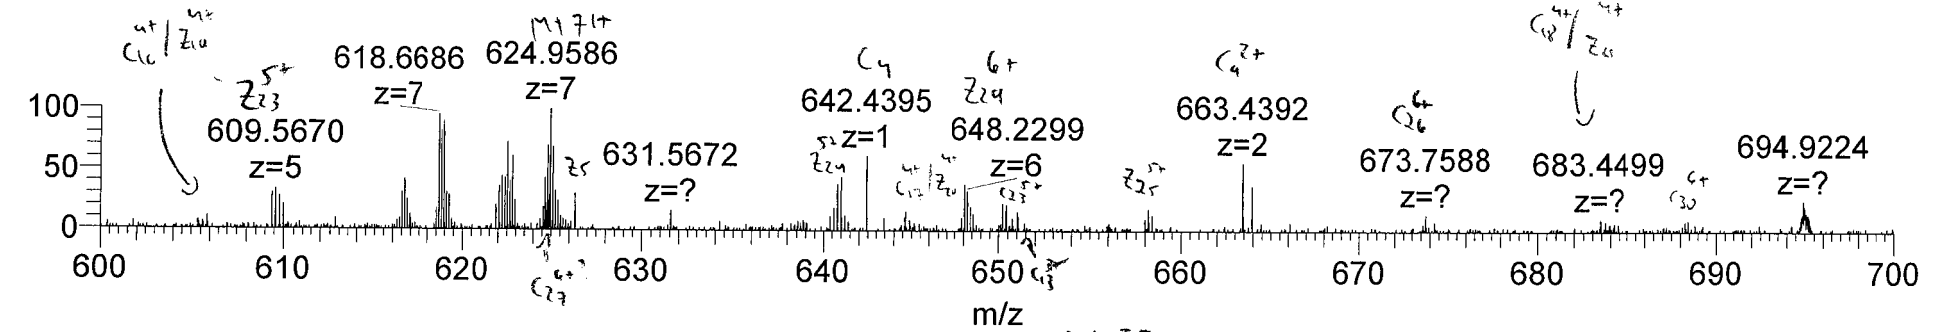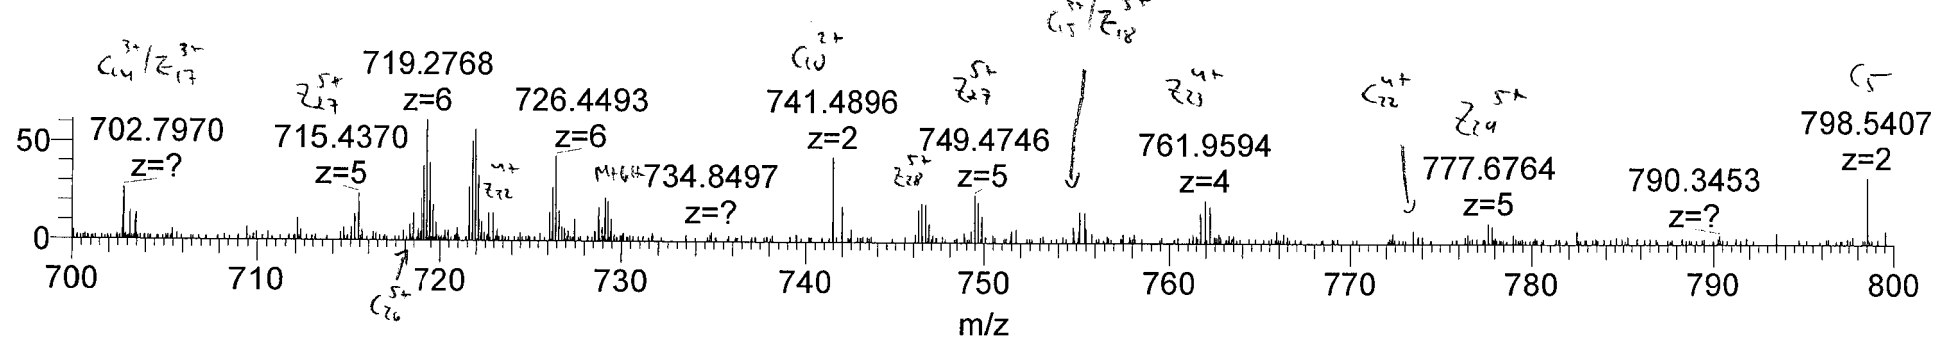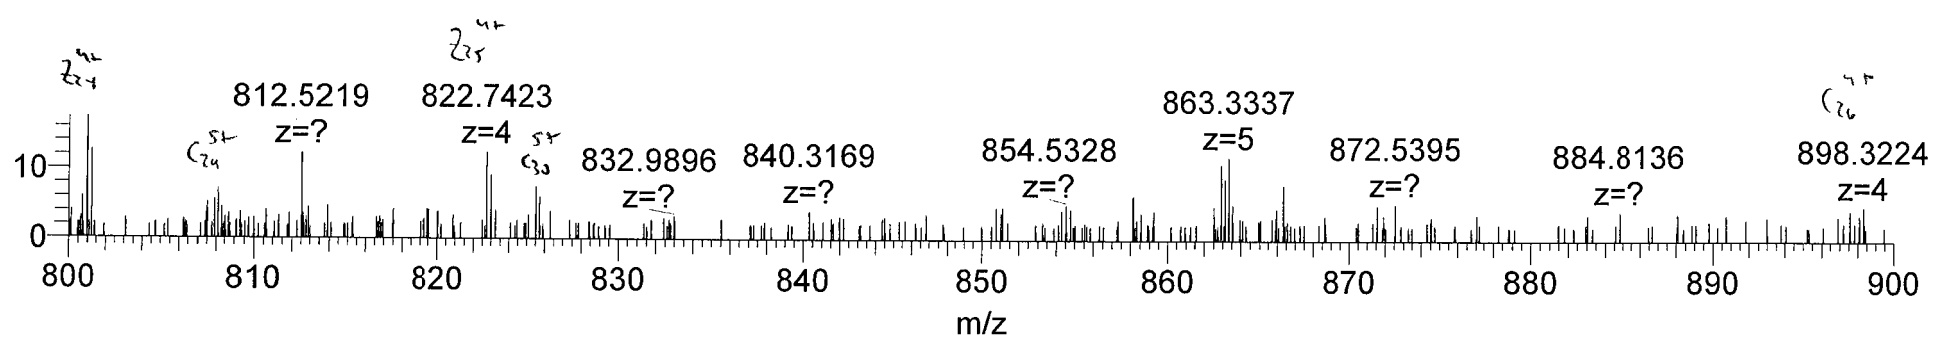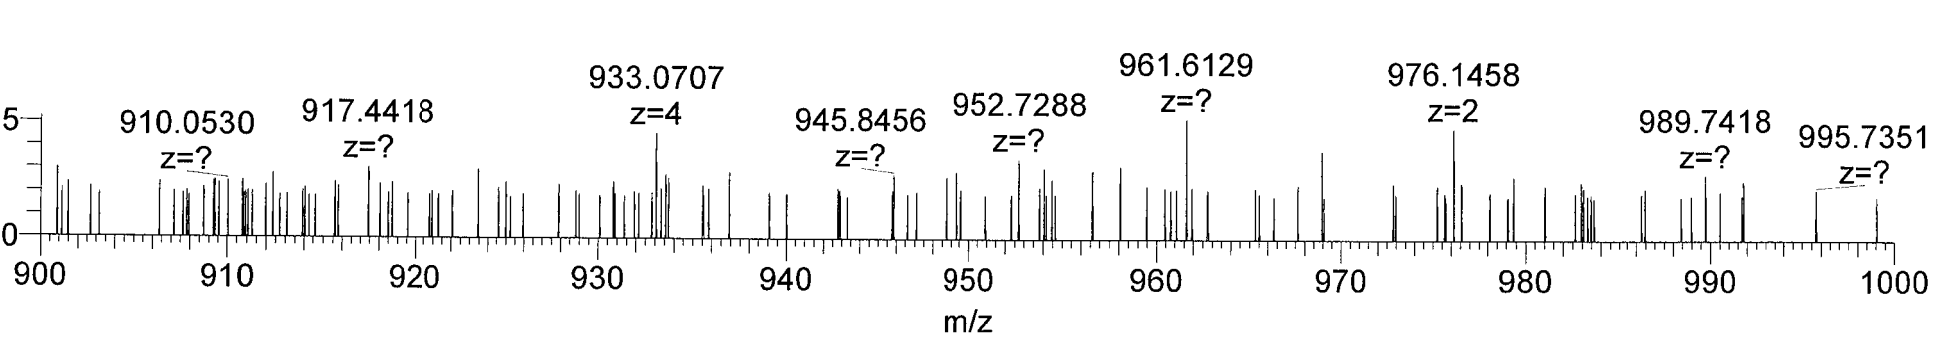

# Fragment Masses

| +7 c ions | +6 c ions | +5 c ions | +4 c ions | +3 c ions | +2 c ions | +1 c ions | Sequence | +1 z ions | +2 z ions | +3 z ions | +4 z ions | +5 z ions | +6 z ions | +7 z ions |          |          |
|-----------|-----------|-----------|-----------|-----------|-----------|-----------|----------|-----------|-----------|-----------|-----------|-----------|-----------|-----------|----------|----------|
| 25.7398   | 29.8619   | 35.6328   | 44.2892   | 58.7165   | 87.5711   | 174.1349  | 1        | R         | 32        | 4366.6564 | 2183.8318 | 1456.2237 | 1092.4196 | 874.1371  | 728.6155 | 624.6714 |
| 48.0400   | 55.8787   | 66.8530   | 83.3145   | 110.7502  | 165.6217  | 330.2360  | 2        | R         | 31        | 4194.5366 | 2097.7719 | 1398.8504 | 1049.3896 | 839.7131  | 699.9288 | 600.0829 |
| 70.3401   | 81.8956   | 98.0733   | 122.3397  | 162.7839  | 243.6722  | 486.3372  | 3        | R         | 30        | 4038.4355 | 2019.7214 | 1346.8167 | 1010.3643 | 808.4929  | 673.9120 | 577.7827 |
| 92.6403   | 107.9124  | 129.2935  | 161.3650  | 214.8176  | 321.7228  | 642.4383  | 4        | R         | 29        | 3882.3344 | 1941.6708 | 1294.7830 | 971.3390  | 777.2727  | 647.8951 | 555.4826 |
| 114.9404  | 133.8293  | 160.5137  | 200.3903  | 268.8513  | 399.7733  | 798.5394  | 5        | R         | 28        | 3726.2332 | 1863.6203 | 1242.7493 | 932.3138  | 746.0525  | 621.8783 | 533.1824 |
| 137.2406  | 159.9461  | 191.7339  | 239.4156  | 318.8850  | 477.8239  | 954.6405  | 6        | R         | 27        | 3570.1321 | 1785.5697 | 1190.7156 | 893.2885  | 714.8322  | 595.8614 | 510.8823 |
| 155.5399  | 181.2953  | 217.9529  | 271.4393  | 361.5833  | 541.8714  | 1082.7355 | 7        | K         | 26        | 3414.0310 | 1707.5191 | 1138.6819 | 854.2632  | 683.6120  | 569.8446 | 488.5821 |
| 167.9730  | 195.8006  | 234.7593  | 293.1973  | 390.5940  | 585.3874  | 1169.7675 | 8        | S         | 25        | 3285.9361 | 1643.4717 | 1095.9835 | 822.2395  | 657.9930  | 548.4954 | 470.2828 |
| 190.2732  | 221.8175  | 263.9795  | 332.2226  | 442.5277  | 663.4379  | 1325.8688 | 9        | R         | 24        | 3198.9040 | 1599.9557 | 1066.9729 | 800.4815  | 640.5868  | 533.9801 | 457.8487 |
| 212.5733  | 247.8343  | 297.1898  | 371.2479  | 494.6614  | 741.4885  | 1481.9697 | 10       | R         | 23        | 3042.8029 | 1521.9051 | 1014.9392 | 761.4562  | 609.3664  | 507.9732 | 435.5495 |
| 234.8735  | 273.8512  | 328.4200  | 410.2732  | 546.6851  | 819.5390  | 1638.0708 | 11       | R         | 22        | 2886.7018 | 1443.8545 | 962.9055  | 722.4309  | 578.1462  | 481.9564 | 413.2494 |
| 257.1737  | 299.8681  | 359.6402  | 449.2984  | 598.7288  | 897.5896  | 1794.1719 | 12       | R         | 21        | 2730.6007 | 1365.8040 | 910.8717  | 683.4056  | 546.9260  | 458.9395 | 390.9492 |
| 279.4738  | 325.8849  | 390.8804  | 488.3237  | 650.7825  | 975.8402  | 1950.2730 | 13       | R         | 20        | 2574.4996 | 1287.7534 | 858.8380  | 644.3804  | 515.7057  | 429.9227 | 368.6490 |
| 301.7740  | 351.9018  | 422.0807  | 527.3490  | 702.7969  | 1053.6907 | 2106.3741 | 14       | R         | 19        | 2418.3985 | 1209.7029 | 806.8043  | 606.3651  | 484.4866  | 403.9058 | 346.3489 |
| 324.0741  | 377.9186  | 453.3009  | 566.3743  | 754.8298  | 1131.7413 | 2262.4753 | 15       | R         | 18        | 2262.2874 | 1131.6523 | 754.7708  | 566.3298  | 453.2653  | 377.8890 | 324.0487 |
| 346.3743  | 403.9355  | 484.5211  | 605.3995  | 806.8636  | 1209.7918 | 2418.5764 | 16       | R         | 17        | 2106.1863 | 1059.6018 | 702.7369  | 527.3045  | 422.0451  | 351.8721 | 301.7486 |
| 368.6744  | 429.9523  | 515.7413  | 644.4248  | 858.8973  | 1287.8424 | 2574.6775 | 17       | R         | 16        | 1950.0951 | 975.5512  | 650.7032  | 488.2792  | 390.8248  | 325.8553 | 279.4484 |
| 390.9746  | 455.9692  | 546.9615  | 683.4501  | 910.9310  | 1365.8929 | 2730.7786 | 18       | R         | 15        | 1793.9940 | 897.5007  | 598.6895  | 449.2540  | 359.8046  | 299.8384 | 257.1482 |
| 403.4078  | 470.4745  | 564.3679  | 705.2081  | 939.9417  | 1409.4089 | 2817.8106 | 19       | S         | 14        | 1637.8929 | 819.4501  | 546.6358  | 410.2287  | 328.3844  | 273.8216 | 234.8481 |
| 421.7070  | 491.8237  | 589.9869  | 737.2319  | 982.6400  | 1473.4564 | 2945.9056 | 20       | K         | 13        | 1550.8609 | 775.9341  | 517.6251  | 388.4707  | 310.9780  | 259.3162 | 222.4149 |
| 429.8530  | 501.3272  | 601.3912  | 751.4872  | 1001.6472 | 1501.9672 | 3002.9270 | 21       | G         | 12        | 1422.7659 | 711.8866  | 474.9268  | 358.4469  | 285.3590  | 237.9671 | 204.1157 |
| 442.2861  | 515.8326  | 618.7976  | 773.2452  | 1030.6579 | 1545.4832 | 3089.9591 | 22       | S         | 11        | 1365.7445 | 683.3759  | 455.9197  | 342.1916  | 273.8547  | 228.4635 | 195.9697 |
| 464.5863  | 541.8494  | 650.0179  | 812.2705  | 1082.6916 | 1623.5337 | 3246.0602 | 23       | R         | 10        | 1278.7124 | 639.8599  | 428.9090  | 320.4336  | 258.5483  | 213.9581 | 183.5366 |
| 477.0194  | 556.3548  | 687.4243  | 834.0285  | 1111.7023 | 1687.0497 | 3333.0922 | 24       | S         | 9         | 1122.6113 | 561.8093  | 374.8753  | 281.4083  | 225.3281  | 187.9413 | 161.2364 |
| 490.8841  | 572.5302  | 686.8348  | 858.2917  | 1144.0532 | 1715.5761 | 3430.1450 | 25       | P         | 8         | 1035.5793 | 518.2933  | 345.8846  | 259.6503  | 207.6247  | 173.4369 | 148.6032 |
| 513.1843  | 598.5471  | 718.0550  | 897.3170  | 1196.0869 | 1793.6267 | 3586.2461 | 26       | R         | 7         | 938.5265  | 469.7669  | 313.5137  | 235.3871  | 188.5111  | 157.2605 | 134.6386 |
| 535.4844  | 624.5639  | 749.2753  | 936.3423  | 1248.1206 | 1871.6772 | 3742.3472 | 27       | R         | 6         | 782.4254  | 391.7163  | 261.4800  | 196.3618  | 157.2909  | 131.2426 | 112.6384 |
| 557.7846  | 650.5808  | 780.4955  | 975.3675  | 1300.1543 | 1949.7278 | 3898.4483 | 28       | R         | 5         | 626.3243  | 313.6658  | 209.4463  | 157.3365  | 126.0707  | 105.2268 | 90.3383  |
| 577.3644  | 673.4239  | 807.9073  | 1009.6323 | 1345.8406 | 2018.2573 | 4035.5072 | 29       | H         | 4         | 470.2232  | 235.6152  | 157.4126  | 118.3113  | 94.8505   | 79.2099  | 68.0381  |
| 589.7976  | 687.9293  | 825.3137  | 1031.3903 | 1374.8513 | 2061.7733 | 4122.5393 | 30       | S         | 3         | 333.1643  | 167.0858  | 111.7263  | 84.0465   | 67.4387   | 56.3668  | 48.4583  |
| 602.2307  | 702.4346  | 842.7201  | 1053.1483 | 1403.8619 | 2105.2893 | 4209.5713 | 31       | S         | 2         | 246.1323  | 123.5698  | 82.7156   | 62.2885   | 50.0323   | 41.8614  | 36.0251  |
| 624.6714  | 728.6155  | 874.1371  | 1092.4196 | 1456.2237 | 2183.8318 | 4366.6564 | 32       | R         | 1         | 159.1002  | 80.0538   | 53.7049   | 40.5305   | 32.6259   | 27.3561  | 23.5920  |



021519\_0p2perYellowTube\_Gradient\_DD\_Heat15 #2864-5591 RT: 11.80-20.45 AV: 21 NL: 1.55E4  
T: FTMS + p NSI d Full ms2 602.9250@etd2.52 [120.0000-2000.0000]

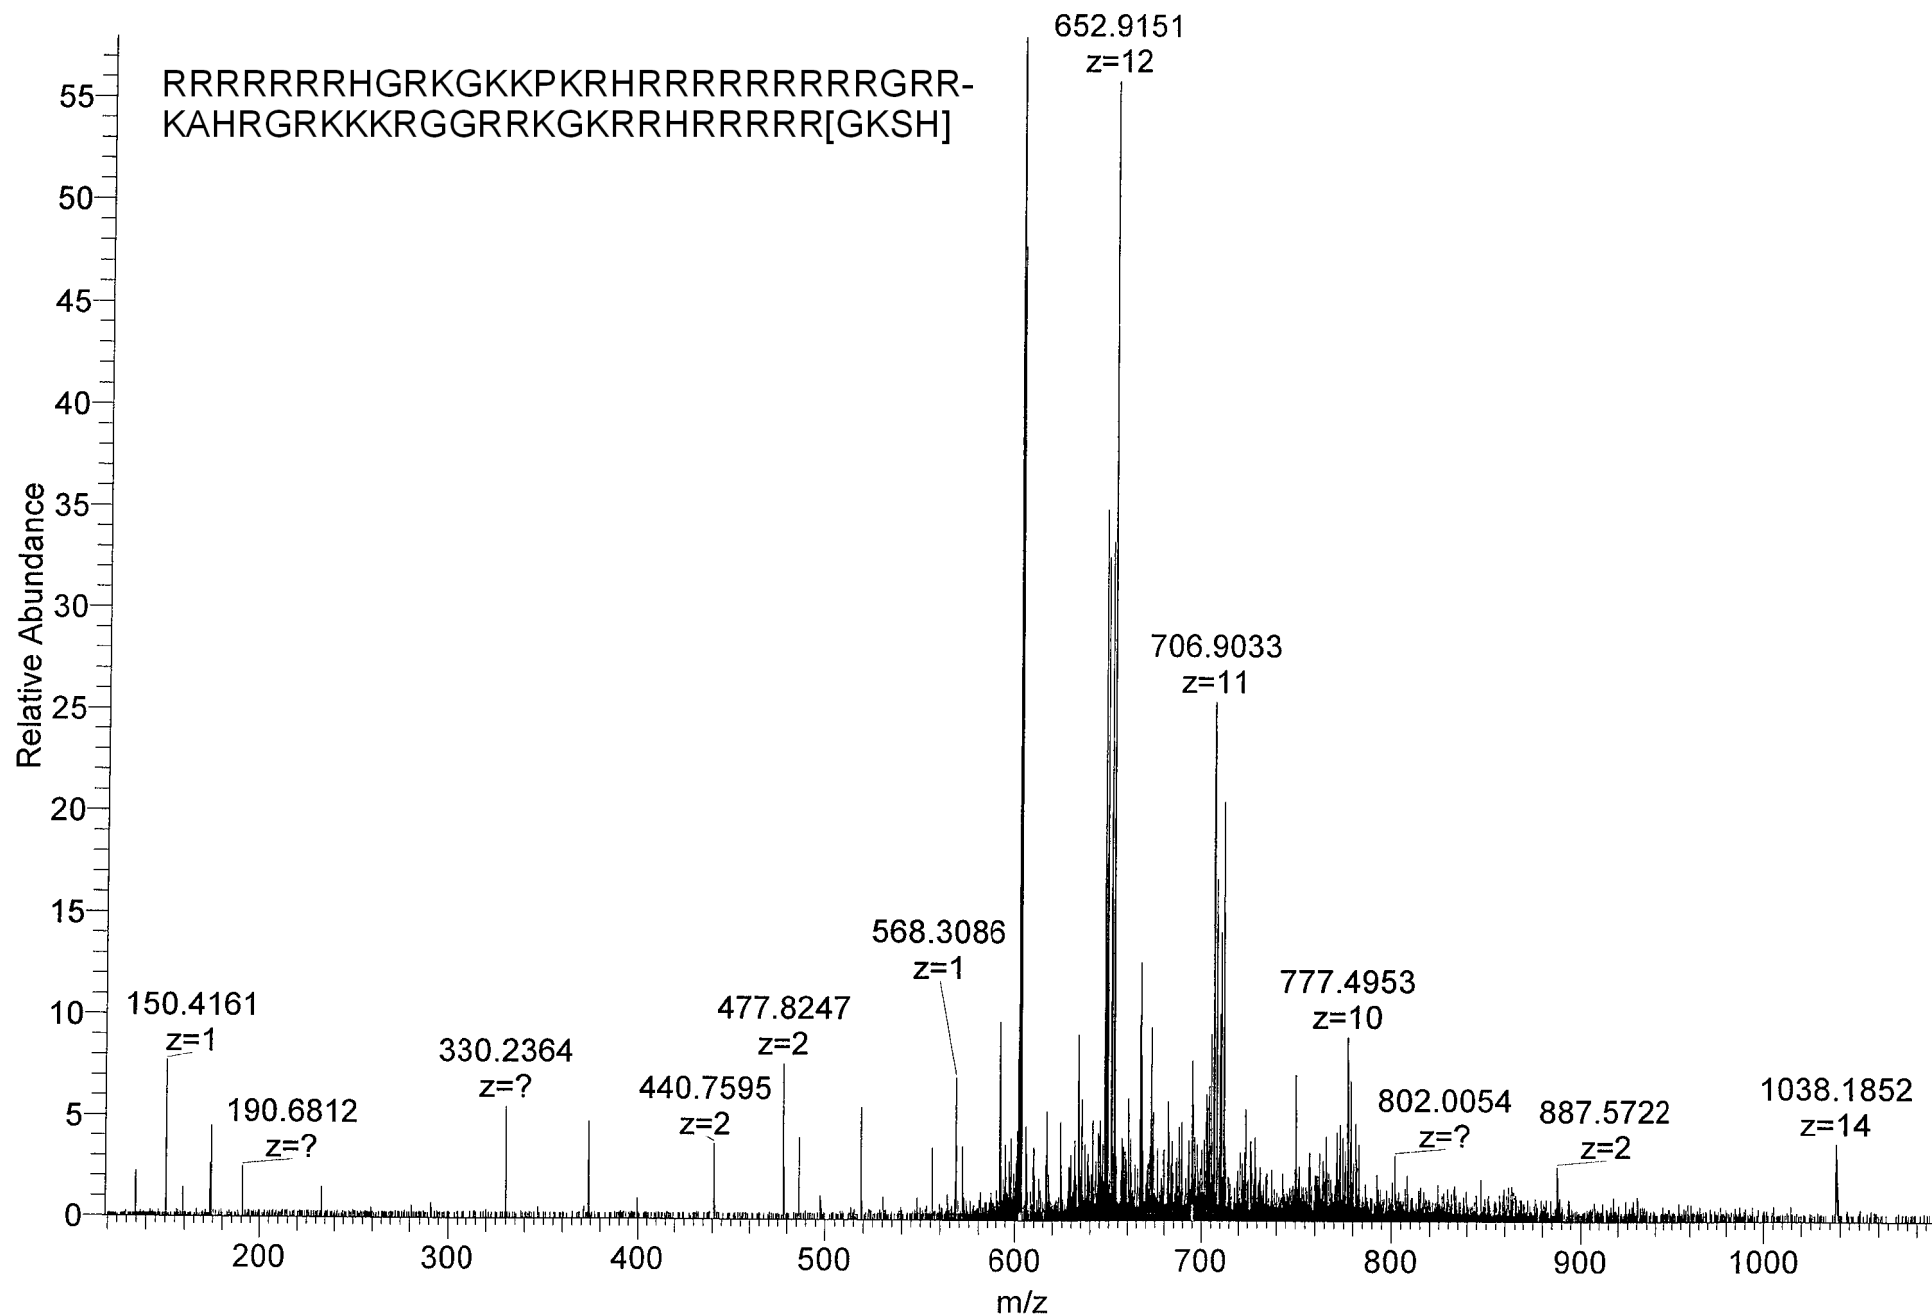

021519\_0p2perYellowTube\_Gradient\_DD\_Heat15 #2865-5592 RT: 11.80-20.45 AV: 21 NL: 1.53E3  
T: FTMS + p NSI d Full ms2 602.9250@etd2.52 [120.0000-2000.0000]

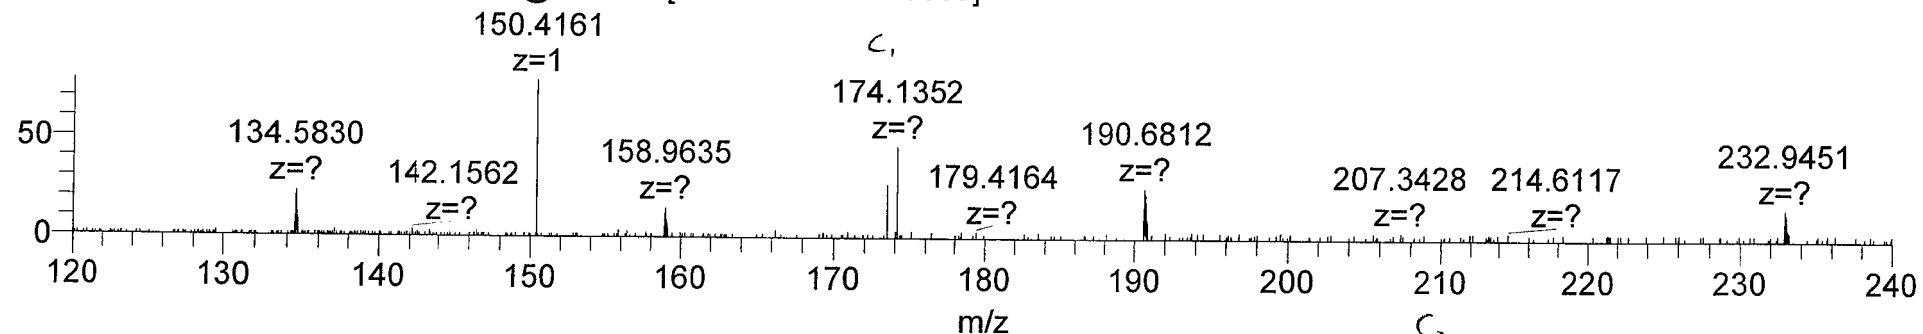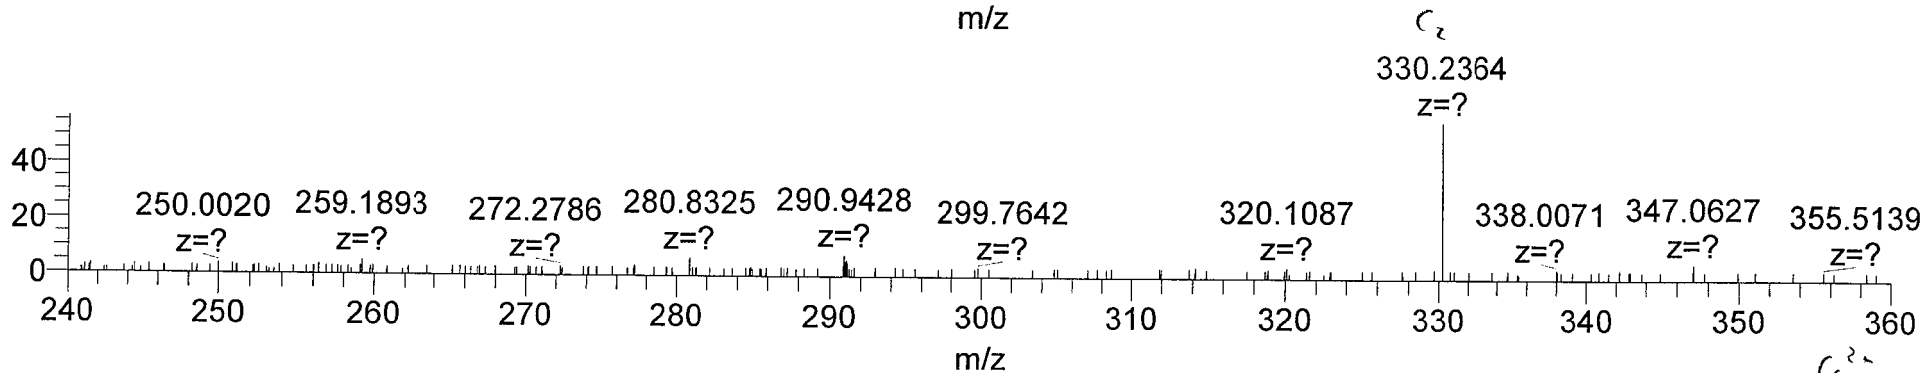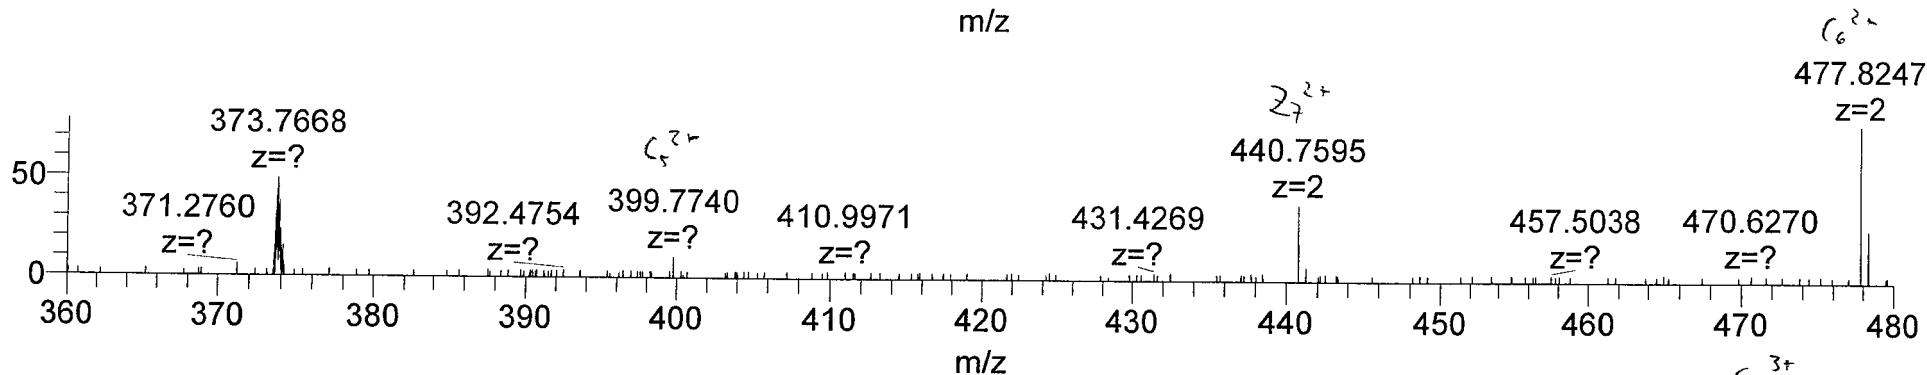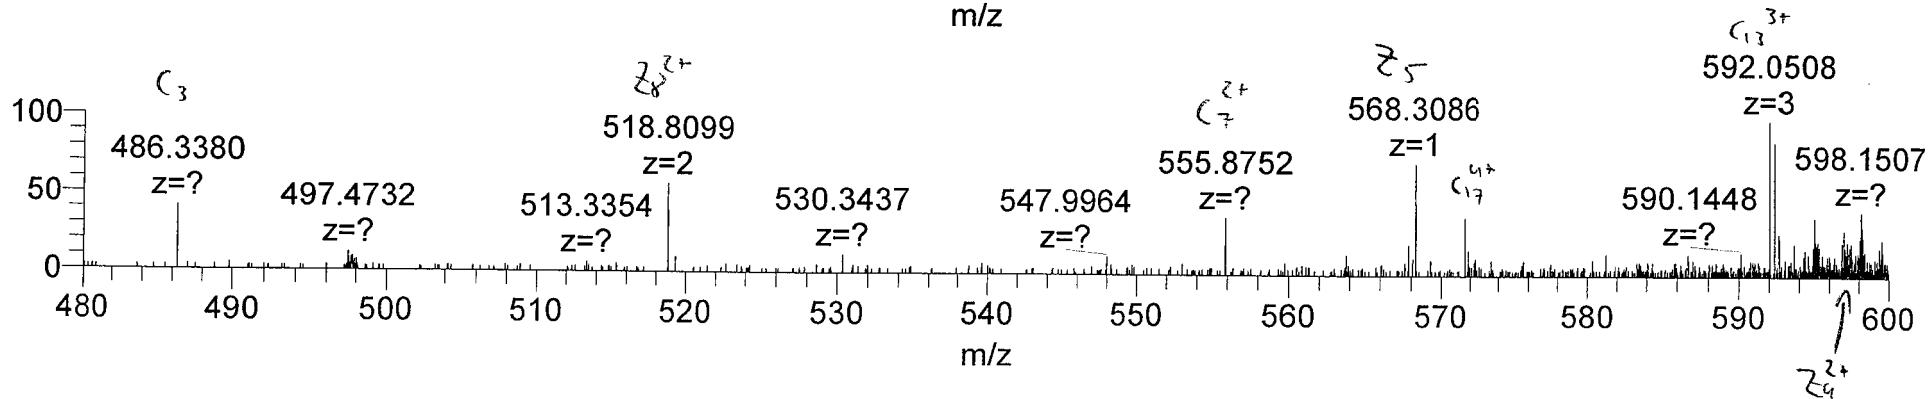

021519\_0p2perYellowTube\_Gradient\_DD\_Heat15 #2865-5592 RT: 11.80-20.45 AV: 21 NL: 1.55E4  
T: FTMS + p NSI d Full ms2 602.9250@etd2.52 [120.0000-2000.0000]

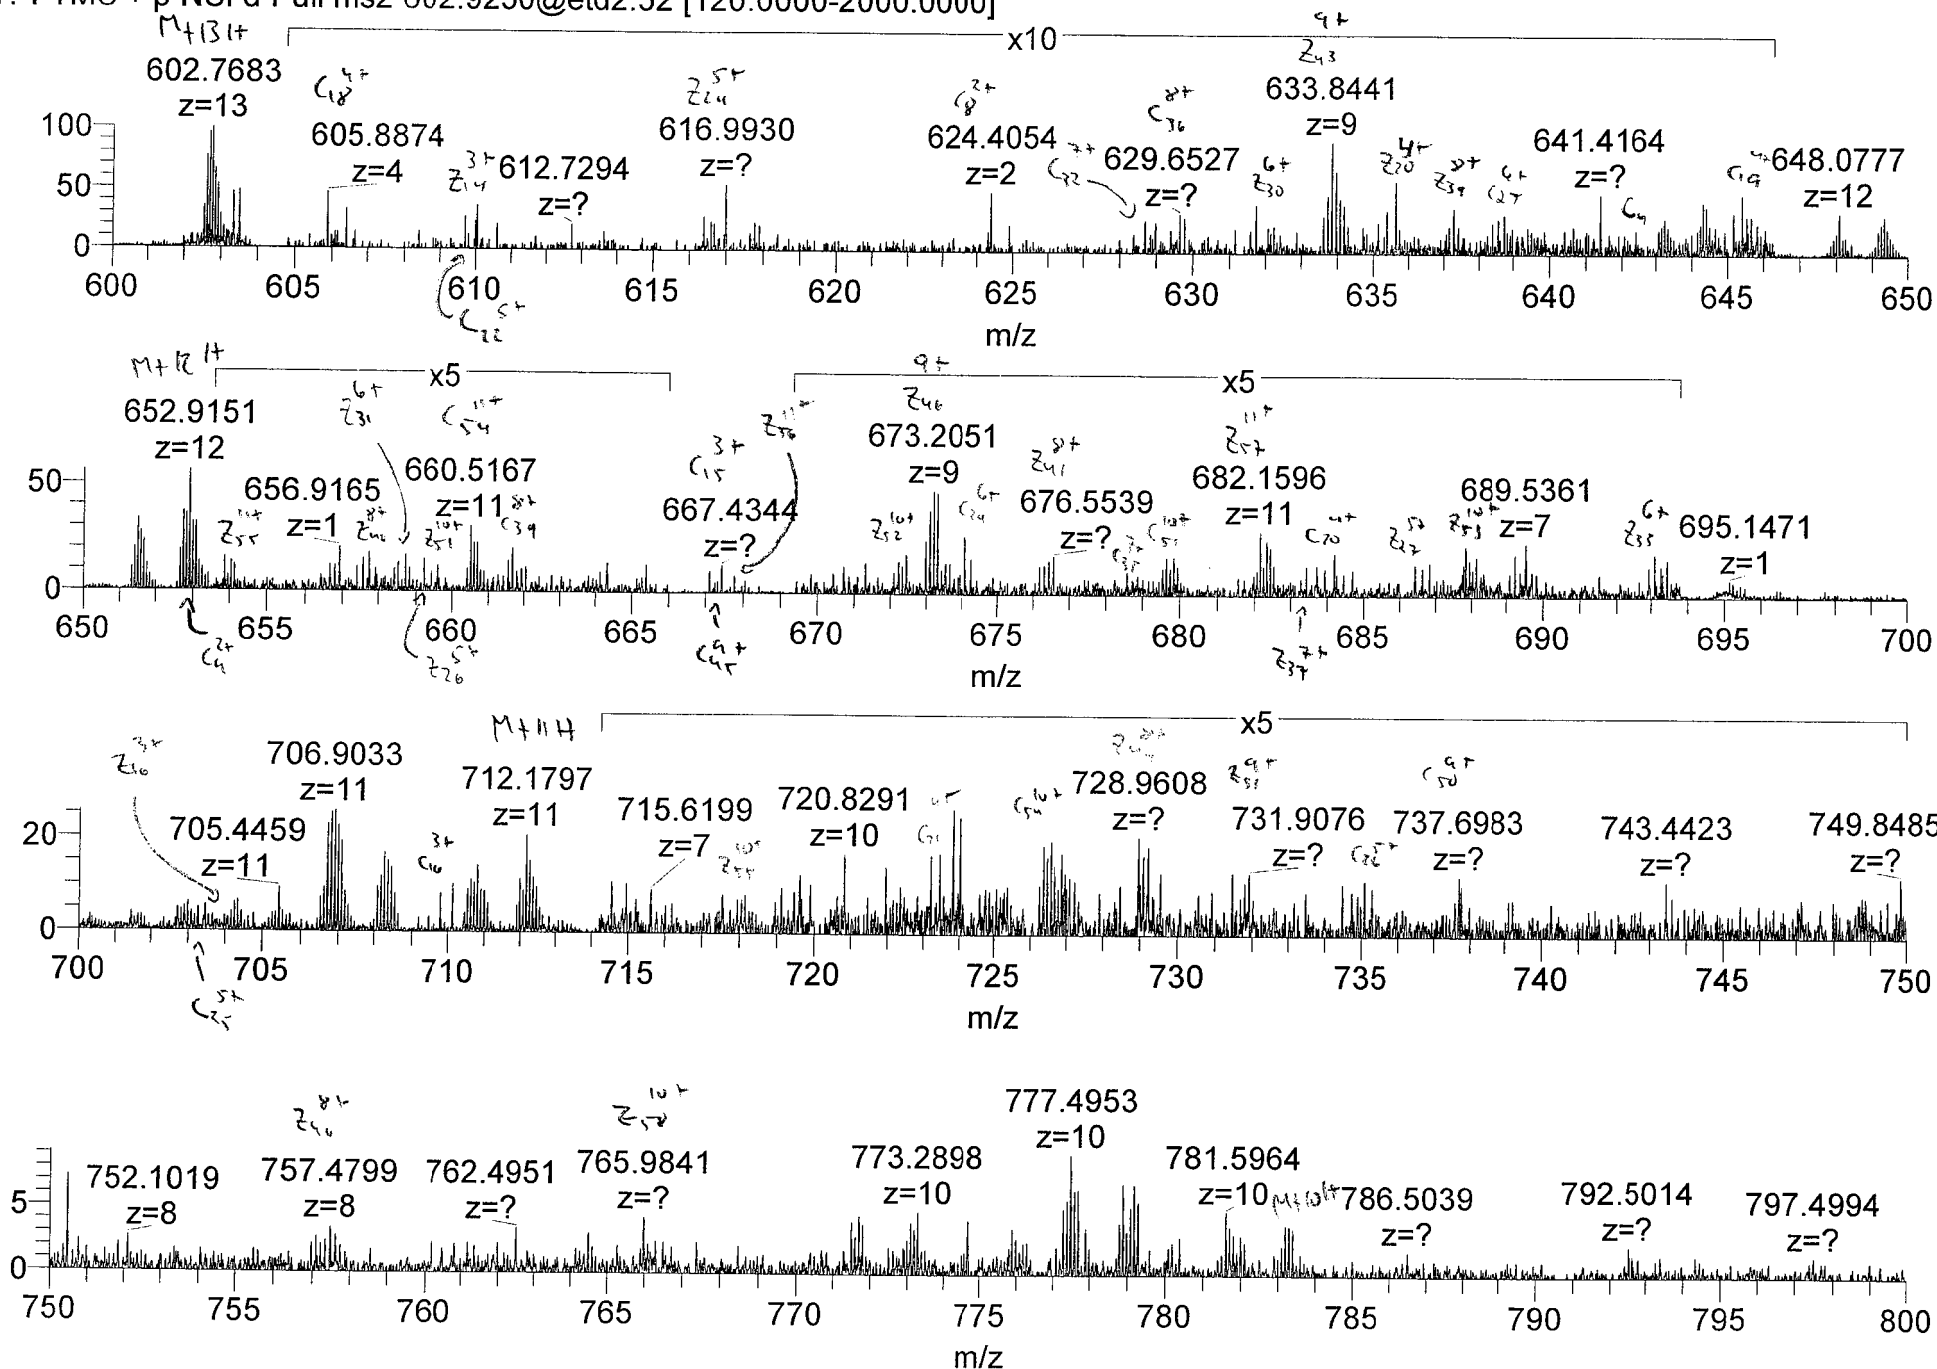

021519\_0p2perYellowTube\_Gradient\_DD\_Heat15 #2865-5592 RT: 11.80-20.45 AV: 21 NL: 5.99E2  
T: FTMS + p NSI d Full ms2 602.9250@etd2.52 [120.0000-2000.0000]

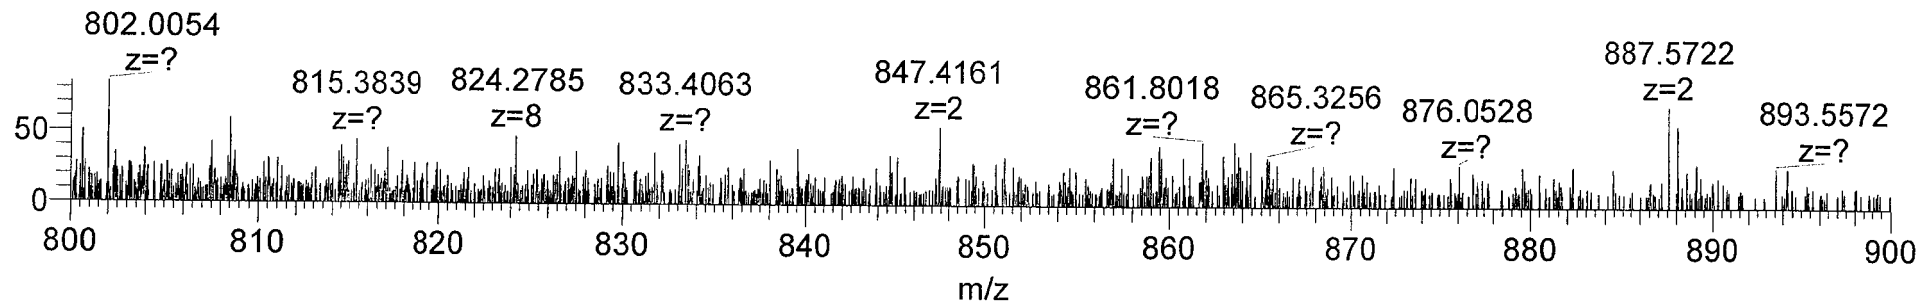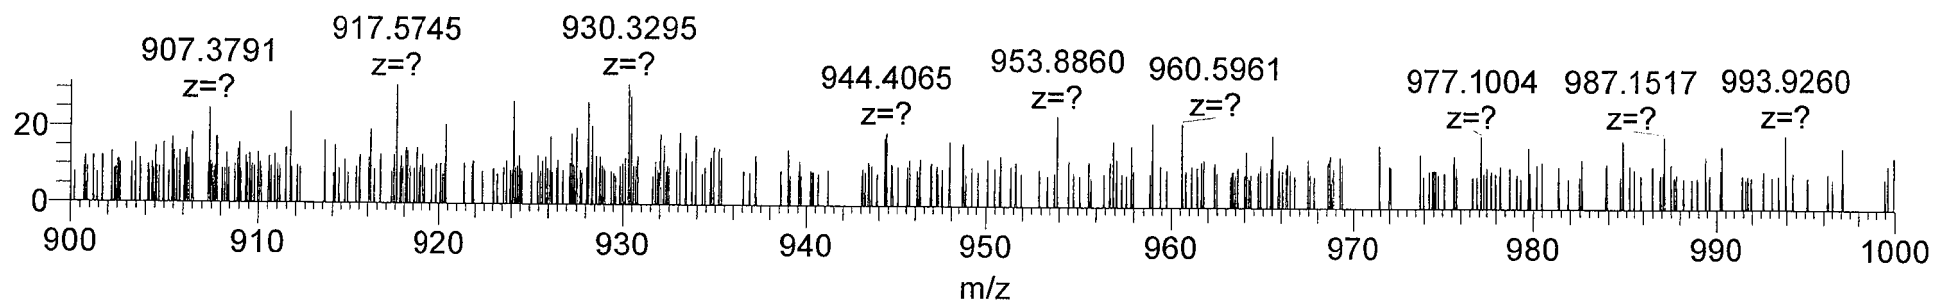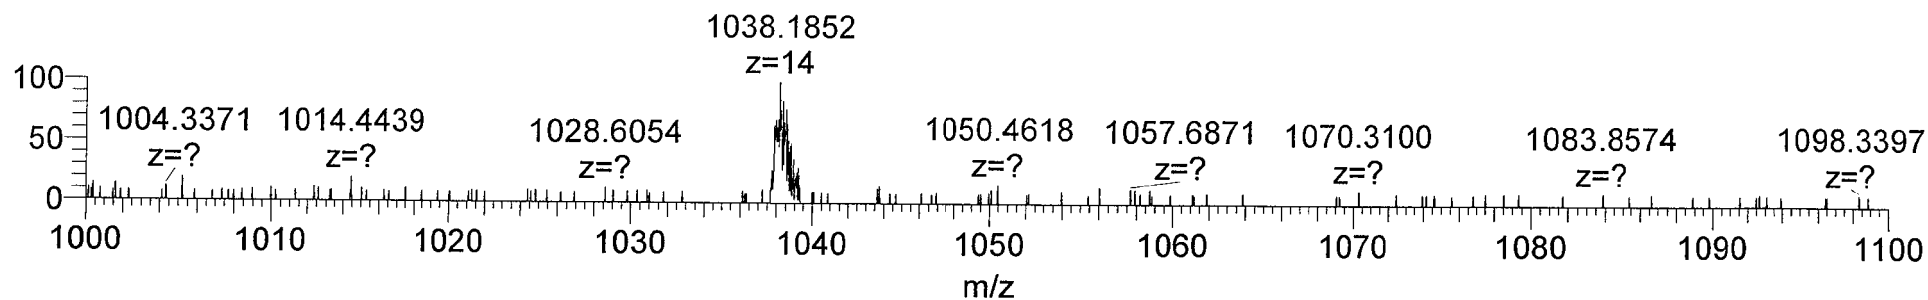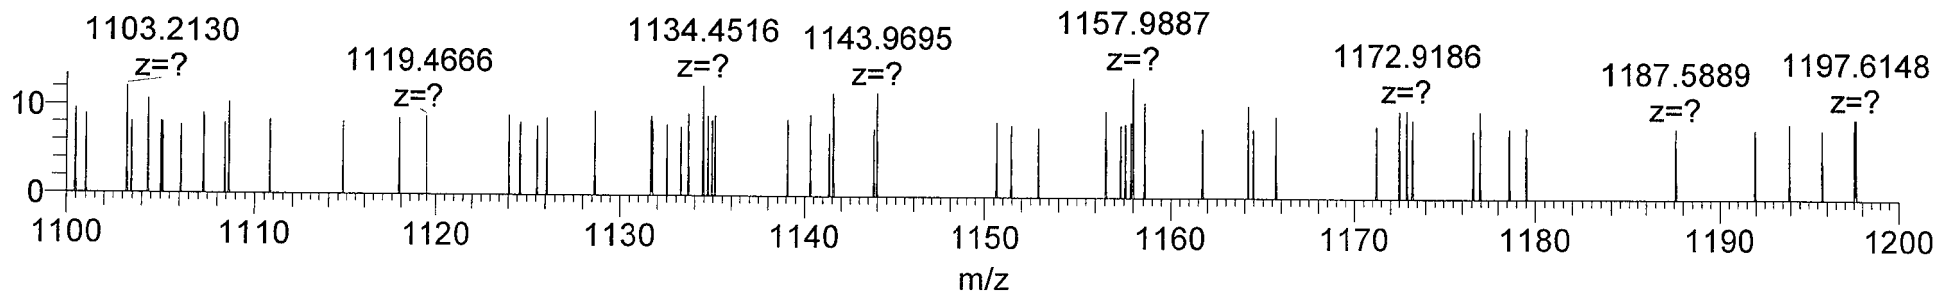

# Fragment Masses

| +11 c ions | +10 c ions | +9 c ions | +8 c ions | +7 c ions | +6 c ions | +5 c ions | +4 c ions | +3 c ions | +2 c ions | +1 c ions |   | Sequence |
|------------|------------|-----------|-----------|-----------|-----------|-----------|-----------|-----------|-----------|-----------|---|----------|
| 16.7462    | 18.3200    | 20.2437   | 22.6482   | 25.7398   | 29.8619   | 35.6328   | 44.2892   | 58.7165   | 87.5711   | 174.1349  | ✓ | R        |
| 30.9372    | 33.9302    | 37.5883   | 42.1609   | 48.0400   | 55.8787   | 66.8530   | 83.3145   | 110.7502  | 165.6217  | 330.2360  | ✓ | R        |
| 45.1282    | 49.5403    | 54.9328   | 61.6735   | 70.3401   | 81.8956   | 98.0733   | 122.3397  | 162.7839  | 243.6722  | 486.3372  | ✓ | R        |
| 59.3192    | 65.1504    | 72.2774   | 81.1862   | 92.6403   | 107.9124  | 129.2935  | 161.3650  | 214.8176  | 321.7228  | 642.4383  | ✓ | R        |
| 73.5102    | 80.7605    | 89.6220   | 100.6988  | 114.9404  | 133.9293  | 160.5137  | 200.3903  | 266.8513  | 399.7733  | 798.5394  | ✓ | R        |
| 87.7012    | 96.3706    | 106.9665  | 120.2114  | 137.2406  | 159.9461  | 191.7339  | 239.4156  | 318.8850  | 477.8239  | 954.6405  | ✓ | R        |
| 101.8922   | 111.9807   | 124.3111  | 139.7241  | 159.5408  | 185.9630  | 222.9541  | 278.4409  | 370.9187  | 555.8744  | 1110.7416 | ✓ | R        |
| 114.3521   | 125.6866   | 139.5399  | 156.8564  | 179.1206  | 208.8061  | 250.3659  | 312.7056  | 416.6050  | 624.4039  | 1247.8005 | ✓ | H        |
| 119.5359   | 131.3887   | 145.8756  | 163.9841  | 187.2665  | 218.3097  | 261.7702  | 326.9610  | 435.6122  | 652.9146  | 1304.8220 | ✓ | G        |
| 133.7269   | 146.9989   | 163.2201  | 183.4968  | 209.5667  | 244.3266  | 292.9804  | 365.9862  | 487.6459  | 730.9652  | 1460.9231 | ✓ | R        |
| 145.3719   | 159.8004   | 177.4529  | 199.5086  | 227.8660  | 265.6757  | 318.6094  | 398.0100  | 530.3442  | 795.0127  | 1589.0181 | ✓ | K        |
| 150.5557   | 165.5105   | 183.7886  | 206.6363  | 236.0119  | 275.1793  | 330.0137  | 412.2653  | 549.3514  | 823.5234  | 1646.0395 | ✓ | G        |
| 162.2007   | 178.3200   | 198.0214  | 222.6482  | 254.3112  | 296.5285  | 355.6327  | 444.2891  | 592.0497  | 887.5709  | 1774.1345 | ✓ | K        |
| 173.8457   | 191.1295   | 212.2542  | 238.6600  | 272.6104  | 317.8776  | 381.2517  | 476.3128  | 634.7480  | 951.6184  | 1902.2294 | ✓ | K        |
| 182.6686   | 200.8348   | 223.0378  | 250.7916  | 286.4751  | 334.0531  | 400.6623  | 500.5760  | 667.0989  | 1000.1447 | 1999.2822 | ✓ | P        |
| 194.3136   | 213.6443   | 237.2706  | 266.8035  | 304.7744  | 355.4023  | 426.2813  | 532.5997  | 709.7972  | 1064.1922 | 2127.3772 | ✓ | K        |
| 208.5046   | 229.2544   | 254.6152  | 286.3162  | 327.0746  | 381.4191  | 457.5015  | 571.6250  | 761.8309  | 1142.2428 | 2283.4783 | ✓ | R        |
| 220.9645   | 242.9603   | 269.8439  | 303.4485  | 346.6544  | 404.2623  | 484.9133  | 605.8898  | 807.5172  | 1210.7722 | 2420.5372 | ✓ | H        |
| 235.1556   | 258.5704   | 287.1885  | 322.9612  | 368.9546  | 430.2791  | 516.1335  | 644.9150  | 859.5510  | 1288.8228 | 2576.6383 | ✓ | R        |
| 249.3466   | 274.1805   | 304.5331  | 342.4738  | 391.2547  | 456.2960  | 547.3537  | 683.9403  | 911.5847  | 1366.8733 | 2732.7394 | ✓ | R        |
| 263.5376   | 289.7906   | 321.8776  | 361.9864  | 413.5549  | 482.3128  | 578.5739  | 722.9656  | 963.6184  | 1444.9239 | 2888.8405 | ✓ | R        |
| 277.7286   | 305.4007   | 339.2222  | 381.4991  | 435.8550  | 508.3297  | 609.7941  | 761.9909  | 1015.6521 | 1522.9745 | 3044.9416 | ✓ | R        |
| 291.9196   | 321.0108   | 356.6668  | 401.0117  | 458.1552  | 534.3465  | 641.0144  | 801.0181  | 1067.6858 | 1601.0250 | 3201.0427 | ✓ | R        |
| 306.1106   | 336.6209   | 373.9113  | 420.5243  | 480.4554  | 560.3634  | 672.2346  | 840.0414  | 1119.7195 | 1679.0756 | 3357.1439 | ✓ | R        |
| 320.3016   | 352.2310   | 391.2559  | 440.0370  | 502.7555  | 586.3802  | 703.4548  | 879.0667  | 1171.7532 | 1757.1261 | 3513.2450 | ✓ | R        |
| 334.4926   | 367.8412   | 408.6005  | 459.5496  | 525.0557  | 612.3971  | 734.6750  | 918.0920  | 1223.7869 | 1835.1767 | 3669.3461 | ✓ | R        |
| 348.6836   | 383.4513   | 425.9450  | 479.0623  | 547.3558  | 638.4139  | 765.8953  | 957.1173  | 1275.8206 | 1913.2272 | 3825.4472 | ✓ | R        |
| 353.8674   | 389.1534   | 432.2808  | 486.1899  | 555.5018  | 647.9175  | 777.2996  | 971.3726  | 1294.8277 | 1941.7380 | 3882.4687 | ✓ | G        |
| 368.0584   | 404.7635   | 449.6253  | 505.7026  | 577.8019  | 673.9344  | 808.5198  | 1010.3979 | 1346.8614 | 2019.7885 | 4038.5698 | ✓ | R        |
| 382.2494   | 420.3736   | 466.9699  | 525.2152  | 600.1021  | 699.9512  | 839.7400  | 1049.4232 | 1398.8951 | 2097.8391 | 4194.6709 | ✓ | R        |
| 393.8944   | 433.1831   | 481.2027  | 541.2271  | 618.4014  | 721.3004  | 865.3590  | 1081.4469 | 1441.5935 | 2161.8866 | 4322.7658 | ✓ | K        |
| 400.3523   | 440.2868   | 489.0957  | 550.1067  | 628.5495  | 733.1399  | 879.5664  | 1099.2062 | 1465.2725 | 2197.4051 | 4393.8030 | ✓ | A        |
| 412.8122   | 453.9927   | 504.3245  | 567.2391  | 648.1294  | 755.9830  | 906.9782  | 1133.4709 | 1510.9588 | 2265.9346 | 4530.8619 | ✓ | H        |
| 427.0032   | 469.6028   | 521.6690  | 586.7517  | 670.4295  | 781.9999  | 938.1984  | 1172.4962 | 1562.9925 | 2343.9851 | 4686.9630 | ✓ | R        |
| 432.1870   | 475.3050   | 528.0047  | 593.8794  | 678.5754  | 791.5035  | 949.6027  | 1186.7516 | 1581.9997 | 2372.4959 | 4743.9844 | ✓ | G        |
| 446.3780   | 490.9151   | 545.3493  | 613.3921  | 700.8756  | 817.5203  | 980.8229  | 1225.7768 | 1634.0334 | 2450.5464 | 4900.0856 | ✓ | R        |
| 458.0230   | 503.7246   | 559.5821  | 629.4039  | 719.1749  | 838.8695  | 1006.4419 | 1257.8006 | 1676.7317 | 2514.5939 | 5028.1805 | ✓ | K        |
| 469.6680   | 516.5341   | 573.8149  | 645.4158  | 737.4742  | 860.2186  | 1032.0609 | 1289.8243 | 1719.4300 | 2578.6414 | 5156.2755 | ✓ | K        |
| 481.3130   | 529.3436   | 588.0476  | 661.4277  | 755.7734  | 881.5678  | 1057.6799 | 1321.8481 | 1762.1283 | 2642.6889 | 5284.3704 | ✓ | K        |
| 495.5040   | 544.9537   | 605.3922  | 680.9403  | 778.0736  | 907.5847  | 1088.9001 | 1360.8733 | 1814.1620 | 2720.7394 | 5440.4716 | ✓ | R        |
| 500.6878   | 550.6559   | 611.7279  | 688.0680  | 786.2195  | 917.0882  | 1100.3044 | 1375.1287 | 1833.1692 | 2749.2501 | 5497.4930 | ✓ | G        |
| 505.8716   | 556.3580   | 618.0636  | 695.1957  | 794.3654  | 926.5918  | 1111.7087 | 1389.3841 | 1852.1763 | 2777.7609 | 5554.5145 | ✓ | G        |
| 520.0626   | 571.9681   | 635.4082  | 714.7083  | 816.6656  | 952.6087  | 1142.9289 | 1428.4094 | 1904.2100 | 2855.8114 | 5710.6156 | ✓ | R        |
| 534.2536   | 587.5782   | 652.7528  | 734.2210  | 838.9658  | 978.6255  | 1174.1492 | 1467.4346 | 1956.2438 | 2933.8620 | 5866.7167 | ✓ | R        |
| 545.8986   | 600.3877   | 666.9855  | 750.2328  | 857.2650  | 999.9747  | 1199.7682 | 1499.4584 | 1998.9421 | 2997.9095 | 5994.8117 | ✓ | K        |
| 551.0824   | 606.0899   | 673.3213  | 757.3605  | 865.4110  | 1009.4783 | 1211.1724 | 1513.7137 | 2017.9492 | 3026.4202 | 6051.8331 | ✓ | G        |
| 562.7274   | 618.8994   | 687.5540  | 773.3724  | 883.7102  | 1030.8274 | 1236.7914 | 1545.7375 | 2060.6475 | 3090.4677 | 6179.9281 | ✓ | K        |
| 576.9184   | 634.5095   | 704.8986  | 792.8850  | 906.0104  | 1056.8443 | 1268.0117 | 1584.7628 | 2112.6813 | 3168.5182 | 6336.0292 | ✓ | R        |
| 591.1094   | 650.1196   | 722.2432  | 812.3977  | 928.3106  | 1082.8611 | 1299.2319 | 1623.7880 | 2164.7150 | 3246.5688 | 6492.1303 | ✓ | R        |
| 603.5693   | 663.8255   | 737.4719  | 829.5300  | 947.8904  | 1105.7043 | 1326.6437 | 1658.0528 | 2210.4013 | 3315.0983 | 6629.1892 | ✓ | H        |
| 617.7603   | 679.4356   | 754.8165  | 849.0427  | 970.1906  | 1131.7211 | 1357.8639 | 1697.0780 | 2262.4350 | 3393.1488 | 6785.2903 | ✓ | R        |
| 631.9513   | 695.0457   | 772.1611  | 868.5553  | 992.4907  | 1157.7380 | 1389.0841 | 1736.1033 | 2314.4687 | 3471.1994 | 6941.3914 | ✓ | R        |
| 646.1423   | 710.6558   | 789.5056  | 888.0679  | 1014.7909 | 1183.7548 | 1420.3043 | 1775.1286 | 2366.5024 | 3549.2499 | 7097.4926 | ✓ | R        |
| 660.3333   | 726.2659   | 806.8502  | 907.5806  | 1037.0910 | 1209.7717 | 1451.5246 | 1814.1539 | 2418.5361 | 3627.3005 | 7253.5937 | ✓ | R        |
| 674.5243   | 741.8760   | 824.1948  | 927.0932  | 1059.3912 | 1235.7885 | 1482.7448 | 1853.1792 | 2470.5698 | 3705.3510 | 7409.6948 | ✓ | R        |
| 679.7081   | 747.5782   | 830.5305  | 934.2209  | 1067.5371 | 1245.2921 | 1494.1491 | 1867.4345 | 2489.5769 | 3733.8618 | 7486.7162 | ✓ | G        |
| 691.3531   | 760.3877   | 844.7633  | 950.2328  | 1085.8364 | 1266.6413 | 1519.7681 | 1899.4583 | 2532.2753 | 3797.9092 | 7594.8112 | ✓ | K        |
| 699.2651   | 769.0909   | 854.4335  | 961.1118  | 1098.2696 | 1281.1466 | 1537.1745 | 1921.2163 | 2561.2859 | 3841.4253 | 7681.8432 | ✓ | S        |
| 711.8144   | 782.8952   | 869.7716  | 978.3671  | 1117.9900 | 1304.1538 | 1564.7831 | 1955.2720 | 2607.3002 | 3910.4467 | 7819.8862 | ✓ | H        |

# Fragment Masses

| Sequence | +1 z ions            | +2 z ions            | +3 z ions            | +4 z ions            | +5 z ions            | +6 z ions           | +7 z ions           | +8 z ions           | +9 z ions           | +10 z ions          | +11 z ions          |
|----------|----------------------|----------------------|----------------------|----------------------|----------------------|---------------------|---------------------|---------------------|---------------------|---------------------|---------------------|
| R 59     | 7819.8862            | 3910.4467            | 2607.3002            | 1956.7270            | 1564.7831            | 1304.1538           | 1117.9900           | 978.3671            | 869.7716            | 782.8952            | 711.8144            |
| R 58     | 7647.7663            | 3824.3868            | 2549.9270            | 1912.6970            | 1530.3591            | 1275.4671           | 1093.4014           | 956.8522            | 850.6472            | 765.6832            | 696.1672            |
| R 57     | 7491.6652            | 3746.3362            | 2497.8933            | 1873.6718            | 1499.1389            | 1249.4503           | 1071.1013           | 937.3395            | 833.3026            | 750.0731            | 681.9762            |
| R 56     | 7335.5641            | 3668.2857            | 2445.8596            | 1834.6465            | 1467.9186            | 1223.4334           | 1048.8011           | 917.8269            | 815.9580            | 734.4630            | 667.7852            |
| R 55     | 7179.4630            | 3590.2351            | 2393.8258            | 1795.6212            | 1436.6984            | 1197.4166           | 1026.5010           | 898.3142            | 798.6135            | 718.8528            | 653.5942            |
| R 54     | 7023.3619            | 3512.1846            | 2341.7921            | 1756.5959            | 1405.4782            | 1171.3997           | 1004.2008           | 878.8016            | 781.2689            | 703.2427            | 639.4031            |
| R 53     | 6867.2608            | 3434.1340            | 2289.7584            | 1717.5707            | 1374.2580            | 1145.3829           | 981.9006            | 859.2890            | 763.9243            | 683.6236            | 625.2121            |
| H 52     | 6711.1597            | 3356.0835            | 2237.7247            | 1678.5454            | 1343.0378            | 1119.3660           | 959.6005            | 839.7763            | 746.5798            | 672.0225            | 611.0211            |
| G 51     | 6574.1008            | 3287.5540            | 2192.0384            | 1644.2806            | 1315.6260            | 1096.5229           | 940.0206            | 822.6440            | 731.3510            | 658.3166            | 598.5612            |
| R 50     | 6517.0793            | 3259.0433            | 2173.0313            | 1630.0253            | 1304.2217            | 1087.0193           | 931.8747            | 815.5163            | 725.0153            | 652.6145            | 593.3775            |
| K 49     | 6380.9782            | 3180.8927            | 2120.9976            | 1591.0000            | 1273.0015            | 1061.0024           | 909.5745            | 796.0036            | 707.6707            | 637.0044            | 579.1864            |
| G 48     | 6232.8832            | 3116.9452            | 2078.2993            | 1558.9763            | 1247.3825            | 1039.6533           | 891.2753            | 779.9918            | 693.4379            | 624.1949            | 567.5415            |
| K 47     | 6175.8617            | 3088.4345            | 2059.2921            | 1544.7209            | 1235.9782            | 1030.1497           | 883.1293            | 772.8641            | 687.1022            | 618.4927            | 562.3577            |
| K 46     | 6047.7668            | 3024.3870            | 2016.5938            | 1512.6972            | 1210.3592            | 1008.8005           | 864.8301            | 756.8522            | 672.8694            | 605.6832            | 550.7127            |
| P 45     | <del>6918.6718</del> | <del>2960.3386</del> | <del>1973.8955</del> | <del>1480.6734</del> | <del>1184.7402</del> | <del>987.4514</del> | <del>846.5308</del> | <del>740.8403</del> | <del>658.6367</del> | <del>582.8737</del> | <del>539.0677</del> |
| K 44     | 5822.6191            | 2911.8132            | 1941.5445            | 1456.4102            | 1165.3296            | 971.2759            | 832.6661            | 728.7087            | 647.8530            | 583.1685            | 530.2447            |
| R 43     | 5694.5241            | 2847.7657            | 1898.8462            | 1424.3865            | 1139.7106            | 949.9267            | 814.3668            | 712.6969            | 633.6203            | 570.3590            | 518.5997            |
| H 42     | 5538.4230            | 2769.7151            | 1846.8125            | 1385.3612            | 1108.4904            | 923.9099            | 792.0667            | 693.1842            | 616.2757            | 554.7488            | 504.4087            |
| R 41     | 5401.3641            | 2701.1857            | 1801.1262            | 1351.0965            | 1081.0786            | 901.0667            | 772.4868            | 676.0519            | 601.0469            | 541.0430            | 491.9488            |
| R 40     | 5245.2630            | 2623.1351            | 1749.0925            | 1312.0712            | 1049.8584            | 875.0499            | 750.1867            | 656.5392            | 583.7024            | 525.4328            | 477.7578            |
| R 39     | 5089.1619            | 2545.0846            | 1697.0588            | 1273.0459            | 1018.6382            | 849.0330            | 727.8865            | 637.0266            | 566.3578            | 509.8227            | 463.5668            |
| R 38     | 4933.0607            | 2467.0340            | 1645.0251            | 1234.0206            | 987.4180             | 823.0162            | 705.5863            | 617.5140            | 549.0132            | 494.2126            | 449.3758            |
| R 37     | 4776.9596            | 2388.9835            | 1592.9914            | 1194.9954            | 956.1977             | 796.9993            | 683.2862            | 598.0013            | 531.6666            | 478.6025            | 435.1848            |
| R 36     | 4620.8585            | 2310.9329            | 1540.9577            | 1155.9701            | 924.9775             | 770.9825            | 660.9860            | 578.4887            | 514.3241            | 462.9924            | 420.9938            |
| R 35     | 4464.7574            | 2232.8823            | 1488.9240            | 1116.9448            | 893.7573             | 744.9656            | 638.6859            | 558.9760            | 496.9795            | 447.3823            | 406.8027            |
| R 34     | 4308.6563            | 2154.8318            | 1436.8903            | 1077.9195            | 862.5371             | 718.9488            | 616.3857            | 539.4634            | 479.6349            | 431.7722            | 392.6117            |
| R 33     | 4152.5552            | 2076.7812            | 1384.8566            | 1038.8943            | 831.3169             | 692.9319            | 594.0855            | 519.9508            | 462.2904            | 416.1621            | 378.4207            |
| R 32     | 3996.4541            | 1998.7307            | 1332.8229            | 999.8690             | 800.0966             | 666.9151            | 571.7854            | 500.4381            | 444.9458            | 400.5520            | 364.2297            |
| R 31     | 3939.4326            | 1970.2199            | 1313.8157            | 985.6136             | 788.6923             | 657.4115            | 563.6395            | 493.3104            | 438.6101            | 394.8498            | 359.0459            |
| R 30     | 3783.3315            | 1892.1694            | 1261.7820            | 946.5883             | 757.4721             | 631.3946            | 541.3393            | 473.7978            | 421.2655            | 379.2397            | 344.8549            |
| K 29     | 3627.2304            | 1814.1188            | 1209.7483            | 907.5631             | 726.2519             | 605.3778            | 519.0391            | 454.2852            | 403.9210            | 363.6296            | 330.6639            |
| A 28     | 3499.1354            | 1750.0714            | 1167.0500            | 875.5393             | 700.6329             | 584.0286            | 500.7399            | 438.2733            | 389.6882            | 350.8201            | 319.0189            |
| H 27     | 3428.0983            | 1714.5528            | 1143.3710            | 857.7800             | 686.4255             | 572.1891            | 490.5917            | 429.3937            | 381.7952            | 343.7164            | 312.5610            |
| R 26     | 3291.0394            | 1646.0233            | 1097.6847            | 823.5153             | 659.0137             | 549.3460            | 471.0119            | 412.2613            | 366.5684            | 330.0105            | 300.1011            |
| G 25     | 3134.9383            | 1567.9728            | 1045.6509            | 784.4900             | 627.7935             | 523.3291            | 448.7117            | 392.7487            | 349.2218            | 314.4004            | 285.9101            |
| R 24     | 3077.9168            | 1539.4621            | 1026.6438            | 770.2347             | 616.3892             | 513.8255            | 440.5658            | 385.6210            | 342.8861            | 308.6982            | 280.7263            |
| K 23     | 2921.8157            | 1461.4115            | 974.6101             | 731.2094             | 585.1690             | 487.8087            | 418.2656            | 366.1083            | 325.5415            | 293.0881            | 266.5353            |
| K 22     | 2793.7208            | 1397.3640            | 931.9118             | 699.1856             | 559.5500             | 466.4595            | 399.9663            | 350.0965            | 311.3088            | 280.2786            | 254.8903            |
| K 21     | 2665.6258            | 1333.3165            | 889.2134             | 667.1619             | 533.9310             | 445.1104            | 381.6671            | 334.0846            | 297.0760            | 267.4691            | 243.2453            |
| R 20     | 2537.5308            | 1269.2691            | 846.5151             | 635.1382             | 508.3120             | 423.7612            | 363.3678            | 318.0727            | 282.8432            | 254.6596            | 231.6003            |
| G 19     | 2381.4297            | 1191.2185            | 794.4814             | 596.1129             | 477.0918             | 397.7443            | 341.0676            | 298.5601            | 265.4987            | 239.0495            | 217.4093            |
| G 18     | 2324.4082            | 1162.7078            | 775.4743             | 581.8575             | 465.6875             | 388.2408            | 332.9217            | 291.4324            | 259.1629            | 233.3474            | 212.2255            |
| R 17     | 2267.3868            | 1134.1970            | 756.4671             | 567.6022             | 454.2832             | 378.7372            | 324.7758            | 284.3047            | 252.8272            | 227.6452            | 207.0418            |
| R 16     | 2111.2857            | 1056.1465            | 704.4334             | 528.5769             | 423.0630             | 352.7203            | 302.4756            | 264.7921            | 235.4827            | 212.0351            | 192.8508            |
| K 15     | 1955.1846            | 978.0959             | 652.3997             | 489.5516             | 391.8427             | 326.7035            | 280.1755            | 245.2794            | 218.1381            | 196.4250            | 178.6598            |
| G 14     | 1827.0896            | 914.0484             | 609.7014             | 457.5279             | 366.2237             | 305.3543            | 261.8762            | 229.2676            | 203.9053            | 183.6155            | 167.0148            |
| K 13     | 1770.0681            | 885.5377             | 590.6942             | 443.2725             | 354.8194             | 295.8508            | 253.7303            | 222.1399            | 197.5696            | 177.9134            | 161.8310            |
| R 12     | 1641.9732            | 821.4902             | 547.9959             | 411.2488             | 329.2005             | 274.6016            | 235.4310            | 206.1280            | 183.3368            | 165.1039            | 150.1860            |
| R 11     | 1485.8721            | 743.4397             | 495.9622             | 372.2235             | 297.9802             | 248.4847            | 213.1308            | 186.6154            | 165.9923            | 149.4938            | 135.9950            |
| H 10     | 1329.7710            | 665.3891             | 443.9285             | 333.1982             | 266.7600             | 222.4679            | 190.8307            | 167.1027            | 148.6477            | 133.8836            | 121.8040            |
| R 9      | 1192.7120            | 596.8597             | 398.2422             | 298.9335             | 239.3482             | 199.6247            | 171.2508            | 149.9704            | 133.4189            | 120.1778            | 109.3441            |
| R 8      | 1036.6109            | 518.8091             | 346.2085             | 259.9082             | 208.1280             | 173.6079            | 148.9507            | 130.4577            | 116.0743            | 104.5676            | 95.1531             |
| R 7      | 880.5098             | 440.7585             | 294.1748             | 220.8829             | 178.9078             | 147.5910            | 126.6505            | 110.9451            | 98.7298             | 88.9575             | 80.9621             |
| R 6      | 724.4087             | 362.7080             | 242.1411             | 181.8576             | 145.6876             | 121.5742            | 104.3503            | 91.4325             | 81.3852             | 73.3474             | 66.7710             |
| R 5      | 568.3076             | 284.6574             | 190.1074             | 142.8324             | 114.4673             | 95.5573             | 82.0502             | 71.9198             | 64.0406             | 57.3733             | 52.5800             |
| G 4      | 412.2065             | 206.6069             | 138.0737             | 103.8071             | 83.2471              | 69.5405             | 59.7500             | 52.4072             | 46.6961             | 42.1272             | 38.3890             |
| K 3      | 355.1850             | 178.0961             | 119.0665             | 89.5517              | 71.8428              | 60.0369             | 51.6041             | 45.2795             | 40.3604             | 36.4251             | 33.2053             |
| S 2      | 227.0901             | 114.0487             | 76.3682              | 57.5280              | 46.2238              | 38.6877             | 33.3048             | 29.2676             | 26.1276             | 23.6156             | 21.5603             |
| H 1      | 140.0580             | 70.5327              | 47.3575              | 35.7700              | 28.8174              | 24.1824             | 20.8717             | 18.3886             | 16.4574             | 14.9124             | 13.6483             |
